# Supplementary material for: Epididymal Region-Specific miRNA Expression and DNA Methylation and Their Roles in Controlling Gene Expression in Rats
Source: PLoS One. 2015 Apr 22;10(4):e0124450. doi: 10.1371/journal.pone.0124450 (PMC4406618; doi:10.1371/journal.pone.0124450)
Supplement: S1 Table — (XLS) [file pone.0124450.s005.xls]

## Sheet: Peaks for CpG Islands
SampleName	PeakID	PeakChromosome	PeakStart	PeakEnd	PeakLength	PeakScore	CpGName	GeneName	PromoterType	Strand	RelativeLocation	CpGRelativeDistanceToTSS	CpGRelativeDistanceToTSE	ProteinName	ProteinID	mRNADescription	Accession	TransStart	TransEnd	TranscriptsLength	CpGLength	cpgNum	gcNum	perCpg	perGc	CpGStart	CpGEnd
IS	12148	chr8	12504092	12505298	1206	2	chr8:12504572-12505073	Slc36a4	HCP	+	Promoter	6	-29960	solute carrier family 36 (proton/amino acid	NP_001101597		NM_001108127	12504816	12534782	29966	501	65	343	25.9	68.5	12504572	12505073
IS	12290	chr9	63387446	63387683	237	2	chr9:63387063-63390119	Fzd5	ICP	-	Promoter	156	-1602	frizzled 5	NP_776210	forms a receptor complex with Lpr6 that binds Wnt7A proteins [RGD].	NM_173838	63388747	63386989	1758	3056	226	1910	14.8	62.5	63387063	63390119
IS	12480	chrX	60838979	60839267	288	2	chrX:60838894-60839108				Unknown										214	16	121	15	56.5	60838894	60839108
IS	9466	chr10	92068255	92069707	1452	2.02	chr10:92068297-92068548	Gfap	LCP	-	Promoter	133	-8542	glial fibrillary acidic protein	NP_058705	intermediate filament protein specific for astrocytes [RGD]. Publication Note: This RefSeq record includes a subset of the publications that are available for this gene. Please see the Entrez Gene record to access additional publications.	NM_017009	92068555	92059880	8675	251	20	156	15.9	62.2	92068297	92068548
IS	10625	chr2	231036642	231036886	244	2.03	chr2:231036541-231036876				Unknown										335	22	178	13.1	53.1	231036541	231036876
IS	12437	chrUn	20144576	20144810	234	2.03	chrUn:20144521-20144852	Stk24	HCP	-	Promoter	-139	-1489	serine/threonine kinase 24	NP_001120966		NM_001127494	20144547	20143197	1350	331	46	257	27.8	77.6	20144521	20144852
IS	10523	chr19	25931046	25931386	340	2.04	chr19:25930757-25932248	Lphn1	HCP	-	Promoter	-374	-40342	latrophilin 1	NP_075251	G protein-coupled receptor for alpha-Latrotoxin [RGD].	NM_022962	25931128	25891160	39968	1491	145	918	19.5	61.6	25930757	25932248
IS	9299	chr10	15941322	15941561	239	2.06	chr10:15941140-15941529	RGD1311343	ICP	-	Promoter	199	-13222	hypothetical protein LOC360506	NP_001101740		NM_001108270	15941533	15928112	13421	389	33	266	17	68.4	15941140	15941529
IS	11920	chr7	137837888	137838323	435	2.06	chr7:137837795-137838102	Prph	ICP	+	Intragenic	1797	-1983	peripherin	NP_036765	contributes to the formation of intermediate filament networks [RGD]. Publication Note: This RefSeq record includes a subset of the publications that are available for this gene. Please see the Entrez Gene record to access additional publications.	NM_012633	137836151	137839931	3780	307	25	193	16.3	62.9	137837795	137838102
IS	10980	chr3	74935131	74935556	425	2.07	chr3:74934744-74935766	Ptprj	HCP	-	Promoter	285	-138492	protein tyrosine phosphatase, receptor type, J	NP_058965	protein tyrosine phosphatase expressed in smooth muscle cells; may be involved in cell adhesion or cell-cell signaling [RGD].	NM_017269	74935540	74796763	138777	1022	120	759	23.5	74.3	74934744	74935766
IS	11242	chr4	75838719	75838999	280	2.07	chr4:75838752-75838969				Unknown										217	18	127	16.6	58.5	75838752	75838969
IS	10132	chr16	19446003	19446246	243	2.08	chr16:19445918-19446395	Crlf1	HCP	-	Promoter	-3409	-14685	cytokine receptor-like factor 1	NP_001099544		NM_001106074	19442747	19431471	11276	477	39	286	16.4	60	19445918	19446395
IS	9635	chr12	33842685	33842924	239	2.09	chr12:33842734-33842954				Unknown										220	22	136	20	61.8	33842734	33842954
IS	12450	chrUn	57617906	57618145	239	2.09	chrUn:57617850-57618080				Unknown										230	21	144	18.3	62.6	57617850	57618080
IS	10583	chr2	42999616	43000039	423	2.1	chr2:42999036-43000907				Unknown										1871	144	1063	15.4	56.8	42999036	43000907
IS	10802	chr20	6357374	6357818	444	2.1	chr20:6357349-6357553				Unknown										204	18	118	17.6	57.8	6357349	6357553
IS	10613	chr2	190469121	190469552	431	2.11	chr2:190469005-190469354	Hormad1	ICP	+	Promoter	71	-35600	HORMA domain containing 1	NP_001102419		NM_001108949	190469108	190504779	35671	349	25	191	14.3	54.7	190469005	190469354
IS	11020	chr3	161390559	161390987	428	2.11	chr3:161390776-161391024	Bcas1	LCP	-	Downstream	84755	4161	breast carcinoma amplified sequence 1	NP_663703		NM_145670	161475655	161395061	80594	248	22	140	17.7	56.5	161390776	161391024
IS	11457	chr5	128230477	128231001	524	2.11	chr5:128230645-128230990				Unknown										345	28	210	16.2	60.9	128230645	128230990
IS	11902	chr7	127875670	127876009	339	2.11	chr7:127875610-127876052	Acr	ICP	+	Promoter	-9567	-15721	acrosin	NP_036622	acrosomal serine protease; plays a role in fertilization [RGD].	NM_012490	127885398	127891552	6154	442	39	296	17.6	67	127875610	127876052
IS	10330	chr18	3425610	3425945	335	2.12	chr18:3425317-3426848	Cables1	LCP	+	Promoter	193	-103916	Cdk5 and Abl enzyme substrate 1	NP_001100874		NM_001107404	3425889	3529998	104109	1531	136	958	17.8	62.6	3425317	3426848
IS	9230	chr10	77691169	77691599	430	2.13	chr10:77689976-77691638	Nog	HCP	-	Promoter	64	-1564	noggin	NP_037122	secreted protein; involved in dorsal fate specification [RGD]. Sequence Note: The RefSeq transcript and protein were derived from genomic sequence to make the sequence consistent with the reference genome assembly. The genomic coordinates used for the transcript record were based on alignments.	NM_012990	77690871	77689243	1628	1662	151	1100	18.2	66.2	77689976	77691638
IS	10339	chr18	29466323	29466650	327	2.13	chr18:29466312-29466639	Dnd1	HCP	-	Degenerate_Downstream	16562	1172	dead end homolog 1	NP_001020585		NM_001025414	29483037	29467647	15390	327	31	200	19	61.2	29466312	29466639
IS	10339	chr18	29466323	29466650	327	2.13	chr18:29466312-29466639	Wdr55	ICP	+	Degenerate_Downstream	5156	1644	WD repeat domain 55	NP_001017932		NM_001017932	29461319	29464831	3512	327	31	200	19	61.2	29466312	29466639
IS	11502	chr5	166861224	166861658	434	2.13	chr5:166860842-166861713	LOC691431	HCP	-	Promoter	248	-24721	hypothetical protein LOC691431	NP_001121046		NM_001127574	166861525	166836556	24969	871	108	622	24.8	71.4	166860842	166861713
IS	10616	chr2	198164275	198164609	334	2.14	chr2:198164148-198164720	Sycp1	ICP	-	Promoter	177	-174818	synaptonemal complex protein 1	NP_036942	component of the transverse filaments of synaptonemal complexes (SCs) that are formed between homologous chromosomes during meiotic prophase; may be involved in chromosome pairing and recombination [RGD].	NM_012810	198164611	197989616	174995	572	43	367	15	64.2	198164148	198164720
IS	11271	chr4	177634572	177635026	454	2.14	chr4:177634706-177634932				Unknown										226	16	129	14.2	57.1	177634706	177634932
IS	10317	chr18	109135	109572	437	2.15	chr18:109160-109810				Unknown										650	45	394	13.8	60.6	109160	109810
IS	11027	chr3	167901446	167901874	428	2.15	chr3:167901390-167901619				Unknown										229	18	137	15.7	59.8	167901390	167901619
IS	11272	chr4	177873779	177874106	327	2.15	chr4:177873688-177873976	Aebp2	LCP	+	Intragenic	52618	-2841	AE binding protein 2	NP_001100096		NM_001106626	177821214	177876673	55459	288	22	171	15.3	59.4	177873688	177873976
IS	12296	chr9	74750838	74751267	429	2.15	chr9:74750768-74751017	Accn4	ICP	+	Downstream	22602	1231	amiloride-sensitive cation channel 4	NP_071570		NM_022234	74728290	74749661	21371	249	21	164	16.9	65.9	74750768	74751017
IS	12443	chrUn	25345288	25345527	239	2.16	chrUn:25345313-25345578	Ptprd	HCP	+	Intragenic	45760	-14822	protein tyrosine phosphatase, receptor type, D	NP_062013	has protein tyrosine phosphatase activity; may regulate receptor tyrosine kinases [RGD].	NM_019140	25299685	25360267	60582	265	23	170	17.4	64.2	25345313	25345578
IS	11458	chr5	129126677	129126918	241	2.17	chr5:129126631-129126849	Slc1a7_predicted	LCP	+	Downstream	51630	7928	solute carrier family 1 (glutamate transporter),	NP_001102443		NM_001108973	129075110	129118812	43702	218	15	134	13.8	61.5	129126631	129126849
IS	11456	chr5	127715655	127715989	334	2.17	chr5:127715769-127716046	Ttc22	LCP	+	Intragenic	15785	-1020	tetratricopeptide repeat domain 22	NP_001100141		NM_001106671	127700122	127716927	16805	277	21	172	15.2	62.1	127715769	127716046
IS	8760	chr1	95950342	95950772	430	2.18	chr1:95950363-95950621	Tulp2	LCP	+	Promoter	-4843	-43040	tubby-like protein 2	NP_001012168		NM_001012168	95955335	95993532	38197	258	19	163	14.7	63.2	95950363	95950621
IS	10603	chr2	175941187	175941521	334	2.18	chr2:175941029-175941648				Unknown										619	48	367	15.5	59.3	175941029	175941648
IS	9617	chr12	15505588	15505827	239	2.19	chr12:15505610-15505885				Unknown										275	27	157	19.6	57.1	15505610	15505885
IS	9630	chr12	32211388	32211623	235	2.19	chr12:32211123-32211384				Unknown										261	20	164	15.3	62.8	32211123	32211384
IS	10475	chr19	49882972	49883306	334	2.19	chr19:49883107-49883340				Unknown										233	20	154	17.2	66.1	49883107	49883340
IS	8763	chr1	96308509	96308956	447	2.2	chr1:96308737-96308968	Grwd1	ICP	-	Promoter	-1707	-7293	glutamate-rich WD repeat containing 1	NP_001012067		NM_001012067	96307145	96301559	5586	231	17	147	14.7	63.6	96308737	96308968
IS	10027	chr15	32531766	32532000	234	2.2	chr15:32531791-32532045	Rem2	ICP	+	Promoter	-8202	-11882	rad and gem related GTP binding protein 2	NP_073176	a Ras-related small GTP-binding protein that is found in high levels in neuronal tissues [RGD].	NM_022685	32540120	32543800	3680	254	24	167	18.9	65.7	32531791	32532045
IS	12113	chr8	80279983	80280228	245	2.2	chr8:80279925-80280169	Leo1	HCP	+	Intragenic	13888	-10498	Leo1, Paf1/RNA polymerase II complex component,	NP_001005548		NM_001005548	80266159	80290545	24386	244	24	148	19.7	60.7	80279925	80280169
IS	12444	chrUn	25346128	25346457	329	2.2	chrUn:25346244-25346506	Ptprd	HCP	+	Intragenic	46690	-13892	protein tyrosine phosphatase, receptor type, D	NP_062013	has protein tyrosine phosphatase activity; may regulate receptor tyrosine kinases [RGD].	NM_019140	25299685	25360267	60582	262	30	194	22.9	74	25346244	25346506
IS	9665	chr12	46724962	46726721	1759	2.21	chr12:46721957-46728297				Unknown										6340	470	3912	14.8	61.7	46721957	46728297
IS	10956	chr3	4082884	4083408	524	2.21	chr3:4083111-4083341	Kcnt1	ICP	+	Intragenic	32887	-4802	potassium channel, subfamily T, member 1	NP_068625	Na(+)-activated potassium channel; may be involved in regulating the firing properties of neurons [RGD].	NM_021853	4050339	4088028	37689	230	17	157	14.8	68.3	4083111	4083341
IS	10347	chr18	29730020	29730312	292	2.22	chr18:29729821-29730542	Pcdha12	ICP	+	Promoter	-4331	-197849	protocadherin alpha 12	NP_446392	member of the cadherin superfamily of cell adhesion molecules; may play a role in spermatogenesis [RGD].	NM_053940	29734512	29928030	193518	721	64	449	17.8	62.3	29729821	29730542
IS	10622	chr2	218981477	218981906	429	2.22	chr2:218981482-218981841				Unknown										359	25	198	13.9	55.2	218981482	218981841
IS	10963	chr3	7377149	7377385	236	2.22	chr3:7377108-7377312				Unknown										204	18	118	17.6	57.8	7377108	7377312
IS	11255	chr4	117622943	117623371	428	2.22	chr4:117622843-117623166				Unknown										323	22	209	13.6	64.7	117622843	117623166
IS	12107	chr8	48644975	48645396	421	2.22	chr8:48645070-48645373	Dscaml1	ICP	+	Intragenic	238849	-78554	Down syndrome cell adhesion molecule-like 1	NP_001101611		NM_001108141	48406372	48723775	317403	303	29	198	19.1	65.3	48645070	48645373
IS	12476	chrX	22707038	22707462	424	2.22	chrX:22707099-22707470				Unknown										371	26	225	14	60.6	22707099	22707470
IS	9198	chr10	17030292	17030626	334	2.23	chr10:17030194-17030708				Unknown										514	58	346	22.6	67.3	17030194	17030708
IS	10329	chr18	2498200	2498527	327	2.23	chr18:2498188-2498514	Gata6	HCP	+	Promoter	-5912	-36297	GATA binding protein 6	NP_062058	zinc-finger transcription factor that binds DNA at GATA regions; involved in gene regulation in the stomach [RGD].	NM_019185	2504263	2534648	30385	326	30	213	18.4	65.3	2498188	2498514
IS	11108	chr3	89479471	89480186	715	2.23	chr3:89479060-89479793	Fbxo3	ICP	-	Promoter	224	-32703	F-box protein 3	NP_001103076		NM_001109606	89479650	89446723	32927	733	48	463	13.1	63.2	89479060	89479793
IS	12099	chr8	21085153	21085575	422	2.23	chr8:21085284-21085505				Unknown										221	25	152	22.6	68.8	21085284	21085505
IS	12447	chrUn	51181644	51182183	539	2.23	chrUn:51181499-51182591				Unknown										1092	95	715	17.4	65.5	51181499	51182591
IS	8801	chr1	187231819	187232248	429	2.24	chr1:187231971-187232172				Unknown										201	17	132	16.9	65.7	187231971	187232172
IS	11265	chr4	170285430	170285808	378	2.24	chr4:170285360-170285576				Unknown										216	18	130	16.7	60.2	170285360	170285576
IS	8896	chr1	78449357	78449796	439	2.25	chr1:78449241-78449460	Dmpk	ICP	+	Promoter	27	-1228	dystrophia myotonica-protein kinase	NP_001100954		NM_001107484	78449323	78450578	1255	219	17	150	15.5	68.5	78449241	78449460
IS	10993	chr3	141545444	141545913	469	2.25	chr3:141545650-141545923	Gins1	ICP	+	Intragenic	10600	-7144	GINS complex subunit 1 (Psf1 homolog)	NP_001102677		NM_001109207	141535186	141552930	17744	273	21	159	15.4	58.2	141545650	141545923
IS	11455	chr5	120089743	120090077	334	2.25	chr5:120089735-120090057				Unknown										322	22	209	13.7	64.9	120089735	120090057
IS	8792	chr1	164435493	164435917	424	2.26	chr1:164435426-164435840				Unknown										414	32	278	15.5	67.1	164435426	164435840
IS	8765	chr1	96966829	96967168	339	2.26	chr1:96966846-96967088	Kcnc1	HCP	+	Intragenic	38693	-3095	Shaw-related voltage-gated potassium channel	NP_036988	voltage gated potassium channel; functions as a delayed rectifier K+ channel [RGD].	NM_012856	96928274	96970062	41788	242	22	159	18.2	65.7	96966846	96967088
IS	9213	chr10	43425084	43425820	736	2.26	chr10:43425180-43425671	Hand1	LCP	-	Promoter	508	-2056	heart and neural crest derivatives expressed	NP_067603	basic Helix-Loop-Helix (bHLH) transcription factor; essential for normal cardiac and extraembryonic development [RGD].	NM_021592	43425933	43423369	2564	491	34	308	13.8	62.7	43425180	43425671
IS	9259	chr10	105955364	105955886	522	2.26	chr10:105955256-105955779	Llgl2	HCP	+	Intragenic	30206	-5033	lethal giant larvae homolog 2	NP_001121021		NM_001127549	105925311	105960550	35239	523	39	349	14.9	66.7	105955256	105955779
IS	9659	chr12	45546118	45546540	422	2.26	chr12:45546183-45546738				Unknown										555	37	345	13.3	62.2	45546183	45546738
IS	9631	chr12	32725096	32725525	429	2.26	chr12:32725041-32725273	Ncor2	LCP	+	Intragenic	162365	-596	nuclear receptor co-repressor 2	NP_001101804		NM_001108334	32562792	32725753	162961	232	16	150	13.8	64.7	32725041	32725273
IS	10806	chr20	7384459	7384793	334	2.26	chr20:7384404-7384778	Cdkn1a	ICP	+	Intragenic	8267	-2187	cyclin-dependent kinase inhibitor 1A (p21,	NP_542960	a Cdk inhibitor; involved in negative regulation of the cell cycle [RGD]. Publication Note: This RefSeq record includes a subset of the publications that are available for this gene. Please see the Entrez Gene record to access additional publications.	NM_080782	7376324	7386778	10454	374	29	246	15.5	65.8	7384404	7384778
IS	11235	chr4	8597915	8598249	334	2.26	chr4:8598060-8598273	Reln	LCP	+	Intragenic	447294	-10975	reelin	NP_536319	regulates neuronal cell migration during development; plays a role in locomotor behavior [RGD]. Publication Note: This RefSeq record includes a subset of the publications that are available for this gene. Please see the Entrez Gene record to access additional publications.	NM_080394	8150872	8609141	458269	213	15	125	14.1	58.7	8598060	8598273
IS	10467	chr19	47363828	47364257	429	2.27	chr19:47363797-47364162				Unknown										365	52	260	28.5	71.2	47363797	47364162
IS	10719	chr2	190151781	190152691	910	2.27	chr2:190151358-190151776	RGD1359334	ICP	-	Promoter	134	-3458	hypothetical protein LOC295265	NP_001007639		NM_001007638	190151701	190148109	3592	418	29	274	13.9	65.6	190151358	190151776
IS	10796	chr20	5391243	5391577	334	2.27	chr20:5391284-5391520				Unknown										236	20	152	16.9	64.4	5391284	5391520
IS	11704	chr6	42486078	42486412	334	2.27	chr6:42485404-42486655	Mboat2	HCP	+	Promoter	-82	-121975	membrane bound O-acyltransferase domain	NP_001101486		NM_001108016	42486111	42608004	121893	1251	116	828	18.5	66.2	42485404	42486655
IS	11881	chr7	114747086	114747607	521	2.27	chr7:114747045-114747441	Mfsd3	LCP	+	Promoter	-3627	-5630	major facilitator superfamily domain containing	NP_001020079		NM_001024908	114750870	114752873	2003	396	32	249	16.2	62.9	114747045	114747441
IS	8758	chr1	95848242	95848576	334	2.28	chr1:95848110-95848677	Lin7b	ICP	-	Promoter	-7037	-9612	lin-7 homolog b	NP_068526	one of several homologs of C.elegans lin-7; localizes to junctional complexes and synaptic junctions; may play a role in formation of cell-cell junctions [RGD].	NM_021758	95841356	95838781	2575	567	50	346	17.6	61	95848110	95848677
IS	9190	chr10	13756684	13757019	335	2.28	chr10:13756662-13757008	Caskin1	LCP	+	Intragenic	16243	-3650	CASK interacting protein 1	NP_542421	brain-specific adaptor protein; binds to Cask [RGD]. Sequence Note: This RefSeq record was created from transcript and genomic sequence data because no single transcript was available for the full length of the gene. The extent of this transcript is supported by transcript alignments and orthologous data.	NM_080690	13740592	13760485	19893	346	25	223	14.5	64.5	13756662	13757008
IS	9534	chr11	84368022	84368446	424	2.28	chr11:84367952-84368206	Gp1bb	ICP	+	Promoter	-1715	-2892	platelet glycoprotein Ib beta	NP_446382	forms GP1b, a receptor for von Willebrand factor, when linked by a disulfide bond to platelet glycoprotein GP1alpha; may be involved in platelet aggregation [RGD].	NM_053930	84369794	84370971	1177	254	21	162	16.5	63.8	84367952	84368206
IS	9648	chr12	42139235	42139567	332	2.28	chr12:42137887-42139701				Unknown										1814	157	963	17.3	53.1	42137887	42139701
IS	9646	chr12	39397325	39397561	236	2.28	chr12:39397244-39397480				Unknown										236	21	125	17.8	53	39397244	39397480
IS	9661	chr12	46105800	46106229	429	2.28	chr12:46106046-46106247	Ep400	HCP	+	Intragenic	69694	-37280	E1A binding protein p400	NP_001100619		NM_001107149	46036452	46143426	106974	201	15	147	14.9	73.1	46106046	46106247
IS	10996	chr3	143399358	143399697	339	2.28	chr3:143399367-143399661	Xkr7	ICP	+	Intragenic	22785	-1007	X Kell blood group precursor related family	NP_001012092		NM_001012092	143376729	143400521	23792	294	22	184	15	62.6	143399367	143399661
IS	11504	chr5	168159654	168160273	619	2.28	chr5:168159855-168160133				Unknown										278	22	164	15.8	59	168159855	168160133
IS	12114	chr8	93757410	93757645	235	2.28	chr8:93756044-93757995				Unknown										1951	212	1270	21.7	65.1	93756044	93757995
IS	9613	chr12	13086084	13086613	529	2.29	chr12:13086116-13086361				Unknown										245	21	147	17.1	60	13086116	13086361
IS	10133	chr16	19580230	19580896	666	2.29	chr16:19580134-19581638	Gdf1	LCP	-	Downstream	8093	-75	growth differentiation factor 1	NP_001037705		NM_001044240	19588979	19580811	8168	1504	125	942	16.6	62.6	19580134	19581638
IS	10332	chr18	3849332	3849664	332	2.29	chr18:3849237-3849736				Unknown										499	45	286	18	57.3	3849237	3849736
IS	11462	chr5	139863706	139864039	333	2.29	chr5:139863762-139863963				Unknown										201	16	111	15.9	55.2	139863762	139863963
IS	11892	chr7	118455239	118455956	717	2.29	chr7:118454928-118455481	Mgat3	LCP	+	Intragenic	25455	-1921	mannoside acetyl glucosaminyltransferase 3	NP_062112	enzyme that catalyzes the addition of N-acetylglucosamine to the beta-linked mannose of the trimannosyl core of N-linked sugar chains [RGD]. Sequence Note: The RefSeq transcript and protein were derived from genomic sequence to make the sequence consistent with the reference genome assembly. The genomic coordinates used for the transcript record were based on alignments.	NM_019239	118429749	118457125	27376	553	42	346	15.2	62.6	118454928	118455481
IS	11892	chr7	118455239	118455956	717	2.29	chr7:118455640-118455914	Mgat3	LCP	+	Intragenic	26028	-1348	mannoside acetyl glucosaminyltransferase 3	NP_062112	enzyme that catalyzes the addition of N-acetylglucosamine to the beta-linked mannose of the trimannosyl core of N-linked sugar chains [RGD]. Sequence Note: The RefSeq transcript and protein were derived from genomic sequence to make the sequence consistent with the reference genome assembly. The genomic coordinates used for the transcript record were based on alignments.	NM_019239	118429749	118457125	27376	274	21	167	15.3	60.9	118455640	118455914
IS	8822	chr1	241298158	241298397	239	2.3	chr1:241298403-241298608				Unknown										205	15	124	14.6	60.5	241298403	241298608
IS	10127	chr16	19020047	19021425	1378	2.3	chr16:19020226-19021641				Unknown										1415	98	924	13.9	65.3	19020226	19021641
IS	10127	chr16	19020047	19021425	1378	2.3	chr16:19019899-19020120				Unknown										221	17	143	15.4	64.7	19019899	19020120
IS	11240	chr4	62313812	62314236	424	2.3	chr4:62313837-62314281	Wdr91	HCP	-	Promoter	-10048	-48863	WD repeat domain 91	NP_001120770		NM_001127298	62304011	62265196	38815	444	31	245	14	55.2	62313837	62314281
IS	11503	chr5	168035204	168035638	434	2.3	chr5:168035413-168035693	Errfi1	HCP	+	Downstream	22871	9592	mitogen-inducible gene 6 protein	NP_001014093		NM_001014071	168012682	168025961	13279	280	23	165	16.4	58.9	168035413	168035693
IS	12140	chr8	125034345	125034776	431	2.3	chr8:125034234-125034523				Unknown										289	24	169	16.6	58.5	125034234	125034523
IS	8694	chr1	29493753	29494110	357	2.31	chr1:29493559-29494562				Unknown										1003	86	657	17.1	65.5	29493559	29494562
IS	8793	chr1	170030104	170030528	424	2.31	chr1:170030058-170030644				Unknown										586	55	417	18.8	71.2	170030058	170030644
IS	8813	chr1	208343107	208343441	334	2.31	chr1:208343118-208343402				Unknown										284	23	182	16.2	64.1	208343118	208343402
IS	9193	chr10	14361308	14361737	429	2.31	chr10:14361446-14361668				Unknown										222	16	136	14.4	61.3	14361446	14361668
IS	10021	chr15	21156340	21156579	239	2.31	chr15:21156546-21156834				Unknown										288	24	199	16.7	69.1	21156546	21156834
IS	10453	chr19	31388911	31389150	239	2.31	chr19:31388847-31389275				Unknown										428	36	286	16.8	66.8	31388847	31389275
IS	10827	chr20	19290966	19291300	334	2.31	chr20:19290961-19291284				Unknown										323	24	189	14.9	58.5	19290961	19291284
IS	11509	chr5	168292318	168292742	424	2.31	chr5:168292427-168292642				Unknown										215	17	132	15.8	61.4	168292427	168292642
IS	12126	chr8	113382996	113383520	524	2.31	chr8:113383074-113383350				Unknown										276	24	176	17.4	63.8	113383074	113383350
IS	12112	chr8	69640333	69640659	326	2.31	chr8:69640228-69641445	Rasl12	ICP	+	Promoter	-6904	-20968	RAS-like, family 12	NP_001101632		NM_001108162	69647740	69661804	14064	1217	116	789	19.1	64.8	69640228	69641445
IS	8789	chr1	162037850	162038526	676	2.32	chr1:162038086-162038296	Olr150	LCP	-	Promoter	-4990	-5921	olfactory receptor Olr150	NP_001000739	Olfactory receptors interact with odorant molecules in the nose, to initiate a neuronal response that triggers the perception of a smell. The olfactory receptor proteins are members of a large family of G-protein-coupled receptors (GPCR) arising from single coding-exon genes. Olfactory receptors share a 7-transmembrane domain structure with many neurotransmitter and hormone receptors and are resp…	NM_001000739	162033201	162032270	931	210	19	132	18.1	62.9	162038086	162038296
IS	10569	chr1_random	601265	601501	236	2.32	chr1_random:601214-601428				Unknown										214	16	122	15	57	601214	601428
IS	9233	chr10	88237461	88237892	431	2.32	chr10:88237392-88237646				Unknown										254	21	141	16.5	55.5	88237392	88237646
IS	11888	chr7	116956783	116957117	334	2.32	chr7:116956919-116957138				Unknown										219	18	132	16.4	60.3	116956919	116957138
IS	12495	chrX	160446996	160447921	925	2.32	chrX:160447291-160450453				Unknown										3162	282	1878	17.8	59.4	160447291	160450453
IS	12495	chrX	160446996	160447921	925	2.32	chrX:160446632-160446925				Unknown										293	25	190	17.1	64.8	160446632	160446925
IS	9209	chr10	35050062	35050411	349	2.33	chr10:35050001-35050415				Unknown										414	42	261	20.3	63	35050001	35050415
IS	9223	chr10	56468923	56469249	326	2.33	chr10:56468935-56469213	Sox15	ICP	+	Promoter	-3981	-6971	SRY-box containing gene 15	NP_001102300		NM_001108830	56473055	56476045	2990	278	23	160	16.5	57.6	56468935	56469213
IS	9911	chr14	13632878	13633344	466	2.33	chr14:13632998-13633457	LOC289482	ICP	+	Promoter	173	-9863	ARD1 homolog B	NP_001019913		NM_001024742	13633054	13643090	10036	459	38	297	16.6	64.7	13632998	13633457
IS	10995	chr3	143273641	143273885	244	2.33	chr3:143273390-143273637	Foxs1	LCP	-	Promoter	263	-1007	forkhead box S1	NP_001012091		NM_001012091	143273776	143272506	1270	247	19	151	15.4	61.1	143273390	143273637
IS	11230	chr4	6058809	6059142	333	2.33	chr4:6058827-6059093				Unknown										266	24	192	18	72.2	6058827	6059093
IS	11700	chr6	26341412	26341837	425	2.33	chr6:26341593-26341913	Kif3c	ICP	+	Promoter	-634	-39480	kinesin family member 3C	NP_445938	may be a vesicle associated microtubule motor protein involved in muscle cell function [RGD].	NM_053486	26342387	26381233	38846	320	33	216	20.6	67.5	26341593	26341913
IS	12481	chrX	63923397	63923731	334	2.33	chrX:63923279-63923630	LOC367808	HCP	-	Promoter	-8551	-17823	hypothetical protein LOC367808	NP_001014294		NM_001014272	63914903	63905631	9272	351	27	218	15.4	62.1	63923279	63923630
IS	8759	chr1	95887383	95887813	430	2.34	chr1:95887513-95887937	Lhb	LCP	+	Promoter	-5273	-6262	luteinizing hormone beta isoform 1	NP_036990	subunit of luteinizing hormone; involved in spermatogenesis and oogenesis [RGD]. Publication Note: This RefSeq record includes a subset of the publications that are available for this gene. Please see the Entrez Gene record to access additional publications.	NM_012858	95892998	95893987	989	424	42	289	19.8	68.2	95887513	95887937
IS	8812	chr1	208319317	208319751	434	2.34	chr1:208319258-208319503	Map3k11	ICP	+	Intragenic	6426	-6906	mitogen-activated protein kinase kinase kinase	NP_001013168		NM_001013150	208312954	208326286	13332	245	31	168	25.3	68.6	208319258	208319503
IS	11227	chr3_random	1609619	1610713	1094	2.34	chr3_random:1609989-1611358	Gnas	HCP	+	Promoter	425	-686	GNAS (guanine nucleotide binding protein, alpha	NP_068617	This gene encodes two alternated gene products, the extra-long form of the alpha-subunit of the Gs G protein (XLalphas) and Alex protein, which are derived from two different ORFs. The Alex interacts with the XL domain of the XLalphas and inhibits its adenylyl cyclase-stimulating function. The XLalphas may play a role in cholera toxin mediated induction of secretory vesicle formation.	NM_021845	1610248	1611359	1111	1369	101	831	14.8	60.7	1609989	1611358
IS	8710	chr1	68995752	68995994	242	2.35	chr1:68995731-68995933				Unknown										202	22	137	21.8	67.8	68995731	68995933
IS	8692	chr1	24185726	24186185	459	2.35	chr1:24185763-24185997				Unknown										234	19	148	16.2	63.2	24185763	24185997
IS	9780	chr13	93346863	93347295	432	2.35	chr13:93347075-93347339	Zfp238	LCP	+	Intragenic	1303	-261	zinc finger protein 238	NP_073169	mouse homolog is a sequence-specific transcriptional repressor [RGD].	NM_022678	93345904	93347468	1564	264	19	164	14.4	62.1	93347075	93347339
IS	10335	chr18	12427060	12427400	340	2.35	chr18:12427002-12427428				Unknown										426	30	222	14.1	52.1	12427002	12427428
IS	11029	chr3	169528937	169529264	327	2.35	chr3:169528951-169529225	Slco4a1	HCP	+	Intragenic	8501	-10489	solute carrier organic anion transporter family,	NP_598292	transports 3,3',5-triiodo-L-thyronine; may play a role in thyroid hormone metabolism [RGD].	NM_133608	169520587	169539577	18990	274	21	162	15.3	59.1	169528951	169529225
IS	11493	chr5	160987668	160988057	389	2.35	chr5:160987564-160988076				Unknown										512	52	357	20.3	69.7	160987564	160988076
IS	12128	chr8	115386426	115386668	242	2.35	chr8:115386615-115386824	Lrrc2	HCP	+	Intragenic	31362	-402	leucine rich repeat containing 2	NP_001012001		NM_001012001	115355357	115387121	31764	209	18	106	17.2	50.7	115386615	115386824
IS	8736	chr1	83845356	83845783	427	2.36	chr1:83845486-83845716	Sars2	ICP	+	Promoter	-2648	-14273	seryl-aminoacyl-tRNA synthetase 2	NP_001099710		NM_001106240	83848249	83859874	11625	230	18	152	15.7	66.1	83845486	83845716
IS	10038	chr15	2511169	2511988	819	2.36	chr15:2512048-2512345	Comtd1	ICP	+	Promoter	-7	-3119	catechol-O-methyltransferase domain containing	NP_001100719		NM_001107249	2512203	2515315	3112	297	28	201	18.9	67.7	2512048	2512345
IS	10362	chr18	72013741	72014187	446	2.36	chr18:72013831-72014158	Dym	HCP	+	Intragenic	124942	-174257	dymeclin	NP_001099603		NM_001106133	71889052	72188251	299199	327	24	173	14.7	52.9	72013831	72014158
IS	10627	chr2	244176373	244176801	428	2.36	chr2:244176587-244176839				Unknown										252	22	154	17.5	61.1	244176587	244176839
IS	10826	chr20	19179886	19180320	434	2.36	chr20:19180117-19180349				Unknown										232	18	137	15.5	59.1	19180117	19180349
IS	10846	chr20	49113148	49113528	380	2.36	chr20:49113278-49113514	Prep	HCP	+	Intragenic	88480	-31274	prolyl endopeptidase	NP_112614	may play a role in neuropeptide catabolism; expressed in brain; most enzyme activity is localized to the cytosolic fraction [RGD].	NM_031324	49024916	49144670	119754	236	17	133	14.4	56.4	49113278	49113514
IS	10967	chr3	11326258	11326878	620	2.36	chr3:11326391-11326803				Unknown										412	31	273	15	66.3	11326391	11326803
IS	11476	chr5	153972540	153973061	521	2.36	chr5:153972629-153973131	Runx3	LCP	+	Intragenic	22765	-260	runt-related transcription factor 3	NP_569109	mouse homolog is a transcription factor required for establishing epigenetic silencing in cytotoxic lineage thymocytes [RGD].	NM_130425	153950115	153973140	23025	502	38	344	15.1	68.5	153972629	153973131
IS	12288	chr9	42295143	42295577	434	2.36	chr9:42295337-42295644	RGD1310553	HCP	+	Promoter	-6537	-17205	ashwin	NP_001008517		NM_001008517	42302027	42312695	10668	307	31	209	20.2	68.1	42295337	42295644
IS	12493	chrX	159249712	159250234	522	2.36	chrX:159249680-159250233	Zfp275	ICP	+	Intragenic	12062	-4858	zinc finger protein 275	NP_001099813		NM_001106343	159237894	159254814	16920	553	38	342	13.7	61.8	159249680	159250233
IS	9514	chr11	4159430	4159673	243	2.37	chr11:4159181-4159447				Unknown										266	18	144	13.5	54.1	4159181	4159447
IS	9769	chr13	46189808	46190342	534	2.37	chr13:46190050-46190266				Unknown										216	17	146	15.7	67.6	46190050	46190266
IS	10322	chr18	155458	155697	239	2.37	chr18:155494-155739	F8	LCP	+	Intragenic	34483	-6392	coagulation factor VIII	NP_899160	human homolog is a cofactor for factor IXa; involved in blood coagulation [RGD].	NM_183331	121133	162008	40875	245	24	163	19.6	66.5	155494	155739
IS	10800	chr20	6198774	6199210	436	2.37	chr20:6198708-6198970	Anks1	HCP	+	Intragenic	77532	-75983	ankyrin repeat and SAM domain containing 1	NP_001101083		NM_001107613	6121307	6274822	153515	262	24	165	18.3	63	6198708	6198970
IS	10837	chr20	43516986	43517415	429	2.37	chr20:43517118-43517348	Fyn	HCP	+	Intragenic	15381	-178333	fyn proto-oncogene	NP_036887	may mediate tyrosine phosphorylation of Cbl protein in cerebellum in response to ethanol administration [RGD]. Publication Note: This RefSeq record includes a subset of the publications that are available for this gene. Please see the Entrez Gene record to access additional publications.	NM_012755	43501852	43695566	193714	230	19	128	16.5	55.7	43517118	43517348
IS	11157	chr3	143273474	143273705	231	2.37	chr3:143273390-143273637	Foxs1	LCP	-	Promoter	263	-1007	forkhead box S1	NP_001012091		NM_001012091	143273776	143272506	1270	247	19	151	15.4	61.1	143273390	143273637
IS	11510	chr5	168550041	168550475	434	2.37	chr5:168549998-168550203				Unknown										205	22	111	21.5	54.1	168549998	168550203
IS	11849	chr7	11353364	11353606	242	2.37	chr7:11353393-11353651	Prg-2	HCP	+	Intragenic	9360	-1796	plasticity-related gene 2	NP_853665		NM_181634	11344162	11355318	11156	258	20	154	15.5	59.7	11353393	11353651
IS	12279	chr9	19676836	19677170	334	2.37	chr9:19676836-19677137	Paqr8	LCP	+	Intragenic	15959	-1022	progestin and adipoQ receptor family member	NP_001014121		NM_001014099	19661027	19678008	16981	301	24	189	15.9	62.8	19676836	19677137
IS	9765	chr13	32178045	32178469	424	2.38	chr13:32177448-32178628				Unknown										1180	104	788	17.6	66.8	32177448	32178628
IS	10358	chr18	61458038	61458571	533	2.38	chr18:61458284-61458492				Unknown										208	16	119	15.4	57.2	61458284	61458492
IS	10623	chr2	220085736	220086175	439	2.38	chr2:220085781-220086008	Sec24d	HCP	+	Intragenic	100084	-10903	SEC24 related gene family, member D	NP_001101193		NM_001107723	219985810	220096797	110987	227	16	134	14.1	59	220085781	220086008
IS	10789	chr20	4039903	4040529	626	2.38	chr20:4040035-4040274	Ehmt2	LCP	-	Promoter	-6445	-18473	euchromatic histone lysine N-methyltransferase	NP_997628	mouse homolog may act as a histone methyltransferase and may be involved in genetic imprinting [RGD].	NM_212463	4033709	4021681	12028	239	19	143	15.9	59.8	4040035	4040274
IS	11723	chr6	135718072	135718595	523	2.38	chr6:135718159-135718678				Unknown										519	59	356	22.7	68.6	135718159	135718678
IS	11882	chr7	114805292	114805536	244	2.38	chr7:114805246-114805655				Unknown										409	33	256	16.1	62.6	114805246	114805655
IS	12470	chrUn_random	192555	192789	234	2.38	chrUn_random:192099-192768				Unknown										669	64	469	19.1	70.1	192099	192768
IS	9235	chr10	90989777	90990106	329	2.39	chr10:90989811-90990051				Unknown										240	22	166	18.3	69.2	90989811	90990051
IS	9602	chr12	2687120	2687739	619	2.39	chr12:2687239-2687689	RGD1563425	LCP	-	Promoter	289	-10672	hypothetical protein LOC498129	NP_001102529		NM_001109059	2687753	2676792	10961	450	39	278	17.3	61.8	2687239	2687689
IS	9782	chr13	100513192	100513526	334	2.39	chr13:100513194-100513509				Unknown										315	24	164	15.2	52.1	100513194	100513509
IS	10363	chr18	74224667	74225097	430	2.39	chr18:74224522-74224940	St8sia5	HCP	+	Intragenic	60743	-237	ST8 alpha-N-acetyl-neuraminide	NP_998793	mouse homolog plays a role in ganglioside biosynthesis [RGD].	NM_213628	74163988	74224968	60980	418	35	261	16.7	62.4	74224522	74224940
IS	10469	chr19	47905220	47905739	519	2.39	chr19:47905269-47905480				Unknown										211	17	131	16.1	62.1	47905269	47905480
IS	10624	chr2	228448544	228448975	431	2.39	chr2:228448680-228448906				Unknown										226	17	122	15	54	228448680	228448906
IS	12297	chr9	74758264	74758504	240	2.39	chr9:74757943-74758317	Chpf	ICP	-	Promoter	-3491	-8186	chondroitin polymerizing factor	NP_001005906		NM_001005906	74754639	74749944	4695	374	26	249	13.9	66.6	74757943	74758317
IS	9239	chr10	91779647	91779889	242	2.4	chr10:91779267-91780287				Unknown										1020	85	686	16.7	67.3	91779267	91780287
IS	9909	chr14	11123818	11124058	240	2.4	chr14:11123535-11123849				Unknown										314	23	179	14.6	57	11123535	11123849
IS	10331	chr18	3663399	3663855	456	2.4	chr18:3663318-3663603	Riok3	ICP	+	Promoter	-9499	-35073	RIO kinase 3	NP_001101893		NM_001108423	3672959	3698533	25574	285	30	196	21.1	68.8	3663318	3663603
IS	10582	chr2	31890318	31890657	339	2.4	chr2:31890295-31890637				Unknown										342	31	176	18.1	51.5	31890295	31890637
IS	10739	chr2	200709055	200709724	669	2.4	chr2:200708874-200710148	Kcnd3	HCP	+	Promoter	-266	-215053	potassium voltage gated channel, Shal-related	NP_113927	voltage-gated K+ channel that generates an A type K+ current [RGD]. Publication Note: This RefSeq record includes a subset of the publications that are available for this gene. Please see the Entrez Gene record to access additional publications.	NM_031739	200709777	200924564	214787	1274	129	857	20.3	67.3	200708874	200710148
IS	10841	chr20	46123072	46123506	434	2.4	chr20:46123157-46123489				Unknown										332	26	192	15.7	57.8	46123157	46123489
IS	11721	chr6	133968009	133968350	341	2.4	chr6:133967934-133968206				Unknown										272	20	162	14.7	59.6	133967934	133968206
IS	11903	chr7	129282371	129282902	531	2.4	chr7:129282355-129282669				Unknown										314	22	181	14	57.6	129282355	129282669
IS	12445	chrUn	30869664	30870033	369	2.4	chrUn:30868881-30870713				Unknown										1832	142	1180	15.5	64.4	30868881	30870713
IS	9764	chr13	22162167	22162597	430	2.41	chr13:22162292-22162544				Unknown										252	24	182	19	72.2	22162292	22162544
IS	9922	chr14	81765915	81766339	424	2.41	chr14:81766059-81766268				Unknown										209	16	119	15.3	56.9	81766059	81766268
IS	10237	chr17	12541015	12541436	421	2.41	chr17:12541004-12541328				Unknown										324	26	188	16	58	12541004	12541328
IS	10242	chr17	17737440	17737964	524	2.41	chr17:17737499-17738066				Unknown										567	43	348	15.2	61.4	17737499	17738066
IS	10792	chr20	4970911	4971156	245	2.41	chr20:4971117-4971392	Ring1	HCP	+	Intragenic	3004	-892	ring finger protein 1	NP_997714	maps within the major histocompatibility complex RT1 region [RGD].	NM_212549	4968250	4972146	3896	275	30	161	21.8	58.5	4971117	4971392
IS	10957	chr3	4239119	4239538	419	2.41	chr3:4239355-4239562				Unknown										207	20	130	19.3	62.8	4239355	4239562
IS	11498	chr5	166026258	166026686	428	2.41	chr5:166026139-166026489				Unknown										350	31	234	17.7	66.9	166026139	166026489
IS	8722	chr1	78587110	78587538	428	2.42	chr1:78587174-78587536	Opa3	HCP	+	Promoter	-5518	-23674	optic atrophy 3	NP_001100956		NM_001107486	78592873	78611029	18156	362	29	226	16	62.4	78587174	78587536
IS	9768	chr13	45273337	45273854	517	2.42	chr13:45273422-45273743				Unknown										321	26	218	16.2	67.9	45273422	45273743
IS	9912	chr14	17587766	17588417	651	2.42	chr14:17587913-17588116	G3bp2	HCP	+	Intragenic	31048	-242	GTPase activating protein (SH3 domain) binding	NP_001014011		NM_001013989	17556966	17588256	31290	203	15	122	14.8	60.1	17587913	17588116
IS	10965	chr3	10977631	10978255	624	2.42	chr3:10977699-10978062				Unknown										363	25	208	13.8	57.3	10977699	10978062
IS	11464	chr5	146438279	146438803	524	2.42	chr5:146438523-146438734				Unknown										211	15	137	14.2	64.9	146438523	146438734
IS	11950	chr7	10900298	10900825	527	2.42	chr7:10900006-10900236	Reep6	HCP	-	Degenerate_Promoter	-8185	-14855	receptor accessory protein 6	NP_001013236		NM_001013218	10891936	10885266	6670	230	18	156	15.7	67.8	10900006	10900236
IS	11950	chr7	10900298	10900825	527	2.42	chr7:10900006-10900236	RGD1359127	HCP	+	Degenerate_Promoter	-1472	-3599	hypothetical protein LOC299612	NP_001007658		NM_001007657	10901593	10903720	2127	230	18	156	15.7	67.8	10900006	10900236
IS	12490	chrX	112779626	112780110	484	2.42	chrX:112779751-112780124				Unknown										373	49	282	26.3	75.6	112779751	112780124
IS	12478	chrX	26614466	26615087	621	2.42	chrX:26614634-26614994	LOC679682	LCP	+	Downstream	6278	1891	hypothetical protein LOC679682	NP_001102845		NM_001109375	26608536	26612923	4387	360	31	235	17.2	65.3	26614634	26614994
IS	8733	chr1	82406531	82406952	421	2.43	chr1:82406731-82407015				Unknown										284	23	184	16.2	64.8	82406731	82407015
IS	8782	chr1	146623020	146623457	437	2.43	chr1:146623182-146623397				Unknown										215	16	135	14.9	62.8	146623182	146623397
IS	9257	chr10	105501665	105502098	433	2.43	chr10:105501906-105502112	Atp5h	HCP	-	Promoter	-2596	-7658	ATP synthase, H+ transporting, mitochondrial F0	NP_062256	subunit d of mitochondrial H(+)-ATP synthase [RGD].	NM_019383	105499413	105494351	5062	206	18	129	17.5	62.6	105501906	105502112
IS	9628	chr12	29032936	29033278	342	2.43	chr12:29032994-29033196				Unknown										202	15	127	14.9	62.9	29032994	29033196
IS	10261	chr17	92443882	92444377	495	2.43	chr17:92444021-92444254				Unknown										233	19	124	16.3	53.2	92444021	92444254
IS	11507	chr5	168234061	168234584	523	2.43	chr5:168234160-168234400				Unknown										240	19	126	15.8	52.5	168234160	168234400
IS	11691	chr6	8041044	8041471	427	2.43	chr6:8041224-8041545				Unknown										321	22	189	13.7	58.9	8041224	8041545
IS	11722	chr6	134102541	134103356	815	2.43	chr6:134102554-134102842				Unknown										288	25	165	17.4	57.3	134102554	134102842
IS	11722	chr6	134102541	134103356	815	2.43	chr6:134103109-134103436				Unknown										327	24	175	14.7	53.5	134103109	134103436
IS	12133	chr8	123168164	123168594	430	2.43	chr8:123168197-123168414				Unknown										217	18	111	16.6	51.2	123168197	123168414
IS	10144	chr16	54755022	54755462	440	2.44	chr16:54754966-54755205				Unknown										239	18	132	15.1	55.2	54754966	54755205
IS	10834	chr20	21885237	21885673	436	2.44	chr20:21885270-21885517	Ado	HCP	+	Downstream	8253	6781	2-aminoethanethiol (cysteamine) dioxygenase	NP_001101096		NM_001107626	21877140	21878612	1472	247	16	147	13	59.5	21885270	21885517
IS	12100	chr8	26354937	26355371	434	2.44	chr8:26355053-26355521	B3gat1	HCP	+	Intragenic	22070	-3781	beta-1,3-glucuronyltransferase 1	NP_446455	mediates cell-cell and cell-substrate interaction and recognition during the development of the nervous system [RGD].	NM_054003	26333217	26359068	25851	468	39	293	16.7	62.6	26355053	26355521
IS	12274	chr9	8573829	8574256	427	2.44	chr9:8574032-8574313	Foxp4	HCP	+	Intragenic	65145	-5425	forkhead box P4	NP_001102258		NM_001108788	8509027	8579597	70570	281	26	157	18.5	55.9	8574032	8574313
IS	8719	chr1	76658827	76659285	458	2.45	chr1:76657579-76659272				Unknown										1693	121	928	14.3	54.8	76657579	76659272
IS	8932	chr1	85259855	85260094	239	2.45	chr1:85260195-85260408	RGD1304580	LCP	+	Promoter	-846	-5059	hypothetical protein LOC292781	NP_001009283		NM_001009283	85261147	85265360	4213	213	24	148	22.5	69.5	85260195	85260408
IS	10137	chr16	31896472	31896711	239	2.45	chr16:31896199-31896855				Unknown										656	57	429	17.4	65.4	31896199	31896855
IS	11006	chr3	155915478	155915901	423	2.45	chr3:155915377-155916304	Pcif1	LCP	+	Intragenic	1614	-11319	PDX1 C-terminal inhibiting factor 1	NP_001102075		NM_001108605	155914226	155927159	12933	927	81	540	17.5	58.3	155915377	155916304
IS	11249	chr4	77346195	77346434	239	2.45	chr4:77346096-77347846				Unknown										1750	167	1116	19.1	63.8	77346096	77347846
IS	11932	chr7	141821530	141822061	531	2.45	chr7:141821560-141821818				Unknown										258	19	145	14.7	56.2	141821560	141821818
IS	11917	chr7	136097332	136097758	426	2.45	chr7:136097430-136097736	Fam113b	ICP	+	Intragenic	93958	-8348	hypothetical protein LOC315283	NP_001034543		NM_001039454	136003625	136105931	102306	306	25	203	16.3	66.3	136097430	136097736
IS	12122	chr8	111844996	111845515	519	2.45	chr8:111845133-111845348	Tex264	HCP	-	Downstream	34451	7553	testis expressed gene 264	NP_001007666		NM_001007665	111879691	111852793	26898	215	19	144	17.7	67	111845133	111845348
IS	8708	chr1	67646705	67647327	622	2.46	chr1:67646929-67647168	Nat14	ICP	-	Downstream	4270	2182	N-acetyltransferase 14	NP_001101936		NM_001108466	67651318	67649230	2088	239	18	166	15.1	69.5	67646929	67647168
IS	8830	chr1	263130853	263131414	561	2.46	chr1:263130803-263131208	Tdrd1	HCP	+	Promoter	29	-43225	tudor domain containing 1	NP_001099672		NM_001106202	263130976	263174230	43254	405	44	271	21.7	66.9	263130803	263131208
IS	9253	chr10	100450667	100451106	439	2.46	chr10:100450877-100451109				Unknown										232	37	165	31.9	71.1	100450877	100451109
IS	9779	chr13	93314911	93315445	534	2.46	chr13:93315053-93315275				Unknown										222	17	144	15.3	64.9	93315053	93315275
IS	10338	chr18	27173629	27174158	529	2.46	chr18:27173726-27174033				Unknown										307	26	210	16.9	68.4	27173726	27174033
IS	10440	chr19	10692758	10693315	557	2.46	chr19:10692959-10693167	Ccl22	LCP	-	Downstream	11066	4260	small inducible cytokine A22	NP_476551	chemoattractant for dendritic cells, natural killer (NK) cells, and the Th2 subset of peripheral blood T cells [RGD].	NM_057203	10704129	10697323	6806	208	17	130	16.3	62.5	10692959	10693167
IS	10437	chr19	275192	275711	519	2.46	chr19:275324-275557	Cdh16	LCP	+	Promoter	-3918	-14102	cadherin 16	NP_001012055		NM_001012055	279358	289542	10184	233	20	138	17.2	59.2	275324	275557
IS	10842	chr20	46184311	46184840	529	2.46	chr20:46184309-46185108				Unknown										799	65	511	16.3	64	46184309	46185108
IS	11450	chr5	61733412	61733932	520	2.46	chr5:61733547-61733767				Unknown										220	17	129	15.5	58.6	61733547	61733767
IS	8767	chr1	107217286	107217888	602	2.47	chr1:107217409-107217630				Unknown										221	22	137	19.9	62	107217409	107217630
IS	9225	chr10	56784232	56784756	524	2.47	chr10:56784375-56784578	Slc2a4	ICP	-	Downstream	7733	2228	solute carrier family 2 , member 4	NP_036883	transports glucose; may play a role in insulin response [RGD]. Publication Note: This RefSeq record includes a subset of the publications that are available for this gene. Please see the Entrez Gene record to access additional publications.	NM_012751	56792209	56786704	5505	203	18	133	17.7	65.5	56784375	56784578
IS	9642	chr12	35708151	35708775	624	2.47	chr12:35708292-35708515				Unknown										223	18	134	16.1	60.1	35708292	35708515
IS	10111	chr15	90214215	90214927	712	2.47	chr15:90214432-90214918	Trim52	ICP	+	Promoter	213	-1467	tripartite motif-containing 52	NP_001099526		NM_001106056	90214462	90216142	1680	486	39	304	16	62.6	90214432	90214918
IS	10787	chr20	1578306	1578643	337	2.47	chr20:1578317-1578603				Unknown										286	29	190	20.3	66.4	1578317	1578603
IS	10835	chr20	25530957	25531282	325	2.47	chr20:25530984-25531231				Unknown										247	17	148	13.8	59.9	25530984	25531231
IS	11482	chr5	156990785	156991250	465	2.47	chr5:156990657-156991147	Hp1bp3	HCP	+	Promoter	-5767	-33141	heterochromatin protein 1, binding protein 3	NP_954539	mouse homolog may play a role in chromatin structure and function [RGD].	NM_199108	156996669	157024043	27374	490	38	299	15.5	61	156990657	156991147
IS	11717	chr6	127305367	127305732	365	2.47	chr6:127305277-127305526				Unknown										249	18	146	14.5	58.6	127305277	127305526
IS	12059	chr7	138414350	138415162	812	2.47	chr7:138413892-138414604	Accn2	HCP	+	Promoter	-407	-29024	amiloride-sensitive cation channel 2, neuronal	NP_077068	forms a proton-gated ion channel that may play a role in sensory neuron function and pain perception [RGD]. Publication Note: This RefSeq record includes a subset of the publications that are available for this gene. Please see the Entrez Gene record to access additional publications.	NM_024154	138414655	138443272	28617	712	86	520	24.2	73	138413892	138414604
IS	12441	chrUn	24882813	24883332	519	2.47	chrUn:24882957-24883159	Acsbg2	LCP	+	Promoter	-7626	-37992	acyl-CoA synthetase bubblegum family member 2	NP_001073565		NM_001080096	24890684	24921050	30366	202	15	132	14.9	65.3	24882957	24883159
IS	9022	chr1	159586546	159587647	1101	2.48	chr1:159586909-159587245	Art5	HCP	-	Promoter	-128	-10088	ADP-ribosyltransferase 5	NP_001013057	mouse homolog is an ecto-ADP-ribosyltransferase that displays NAD-glycohydrolase activity [RGD].	NM_001013039	159586949	159576989	9960	336	31	223	18.5	66.4	159586909	159587245
IS	8717	chr1	76479486	76480102	616	2.48	chr1:76479587-76480077	Slc8a2	LCP	+	Intragenic	5895	-18792	solute carrier family 8 (sodium/calcium	NP_511174	isoform 2 of sodium/calcium exchanger; regulates intracellular calcium levels and maintains calcium homeostasis; may be important for the control of synaptic plasticity [RGD]. Publication Note: This RefSeq record includes a subset of the publications that are available for this gene. Please see the Entrez Gene record to access additional publications.	NM_078619	76473937	76498624	24687	490	40	310	16.3	63.3	76479587	76480077
IS	10028	chr15	33014342	33014776	434	2.48	chr15:33014247-33015201	Slc22a17	ICP	-	Promoter	460	-6034	solute carrier family 22 (organic cation	NP_803156	may act as a brain-specific organic ion transporter [RGD].	NM_177421	33015184	33008690	6494	954	85	636	17.8	66.7	33014247	33015201
IS	10593	chr2	115170310	115170845	535	2.48	chr2:115170355-115170630				Unknown										275	20	169	14.5	61.5	115170355	115170630
IS	10579	chr2	25702057	25702386	329	2.48	chr2:25701961-25702458	Zbed3	HCP	+	Intragenic	9489	-1454	zinc finger, BED domain containing 3	NP_001020900		NM_001025729	25692720	25703663	10943	497	41	344	16.5	69.2	25701961	25702458
IS	11263	chr4	149664728	149665252	524	2.48	chr4:149664903-149665249				Unknown										346	25	212	14.5	61.3	149664903	149665249
IS	11711	chr6	105856410	105856957	547	2.48	chr6:105856511-105856802				Unknown										291	22	168	15.1	57.7	105856511	105856802
IS	8688	chr1	15544819	15545153	334	2.49	chr1:15544849-15545106	Mtap7	LCP	+	Intragenic	104556	-8283	microtubule-associated protein 7	NP_001099740		NM_001106270	15440421	15553260	112839	257	21	178	16.3	69.3	15544849	15545106
IS	9926	chr14	86534755	86535284	529	2.49	chr14:86534867-86535148	Aebp1	HCP	+	Intragenic	9260	-657	AE binding protein 1	NP_001094440		NM_001100970	86525747	86535664	9917	281	24	172	17.1	61.2	86534867	86535148
IS	10357	chr18	54649340	54649785	445	2.49	chr18:54649577-54649801				Unknown										224	26	152	23.2	67.9	54649577	54649801
IS	10481	chr19	53750988	53751480	492	2.49	chr19:53750873-53751324	Tubb3	ICP	+	Intragenic	8447	-608	tubulin, beta 3	NP_640347		NM_139254	53742651	53751706	9055	451	32	267	14.2	59.2	53750873	53751324
IS	11253	chr4	94627675	94628284	609	2.49	chr4:94627780-94628060				Unknown										280	22	198	15.7	70.7	94627780	94628060
IS	11726	chr6	136199850	136200277	427	2.49	chr6:136199917-136200462				Unknown										545	54	373	19.8	68.4	136199917	136200462
IS	11918	chr7	136155972	136156351	379	2.49	chr7:136155901-136156179				Unknown										278	23	174	16.5	62.6	136155901	136156179
IS	12434	chrUn	8036962	8037196	234	2.49	chrUn:8036885-8037201				Unknown										316	27	203	17.1	64.2	8036885	8037201
IS	10157	chr16	85495589	85495827	238	2.5	chr16:85495625-85495864				Unknown										239	17	129	14.2	54	85495625	85495864
IS	10356	chr18	52311043	52311570	527	2.5	chr18:52311290-52311494				Unknown										204	15	111	14.7	54.4	52311290	52311494
IS	12309	chr9	108512976	108513589	613	2.5	chr9:108513103-108513338	Zfp161	ICP	+	Promoter	411	-937	zinc finger protein 161	NP_758828	mouse homolog has growth inhibiting activity and may act as a transcriptional repressor of c-myc [RGD].	NM_172325	108512809	108514157	1348	235	17	126	14.5	53.6	108513103	108513338
IS	10604	chr2	178523595	178524209	614	2.51	chr2:178523590-178524608	Lrba	LCP	+	Intragenic	266828	-263527	LPS-responsive beige-like anchor	NP_001102025		NM_001108555	178257271	178787626	530355	1018	81	618	15.9	60.7	178523590	178524608
IS	11517	chr5	172153984	172154598	614	2.51	chr5:172154139-172154512				Unknown										373	28	232	15	62.2	172154139	172154512
IS	11460	chr5	138606654	138607354	700	2.51	chr5:138606898-138607102	St3gal3	HCP	-	Promoter	-7713	-209528	ST3 beta-galactoside alpha-2,3-sialyltransferase	NP_113885	plays a role in the formation of terminal carbohydrate groups of glycolipids and glycoproteins [RGD].	NM_031697	138599287	138397472	201815	204	14	115	13.7	56.4	138606898	138607102
IS	8740	chr1	84306725	84307352	627	2.52	chr1:84306941-84307209	Ggn	HCP	+	Intragenic	2094	-1010	gametogenetin	NP_001013083		NM_001013065	84304981	84308085	3104	268	21	165	15.7	61.6	84306941	84307209
IS	9775	chr13	70813195	70813736	541	2.52	chr13:70813414-70813665				Unknown										251	17	135	13.5	53.8	70813414	70813665
IS	9913	chr14	17726993	17727327	334	2.52	chr14:17726922-17727383				Unknown										461	32	236	13.9	51.2	17726922	17727383
IS	10130	chr16	19167712	19168048	336	2.52	chr16:19167683-19168048	Pik3r2	HCP	+	Promoter	-3235	-11785	phosphatidylinositol 3-kinase, regulatory	NP_071521	regulatory subunit of the enzyme phosphatidylinositol 3-kinase; involved in cellular signaling mechanisms [RGD].	NM_022185	19171100	19179650	8550	365	26	242	14.2	66.3	19167683	19168048
IS	10586	chr2	62229287	62229534	247	2.52	chr2:62229463-62229809				Unknown										346	38	208	22	60.1	62229463	62229809
IS	10793	chr20	5194525	5195141	616	2.52	chr20:5194719-5194952	Syngap1	LCP	+	Intragenic	4897	-13614	synaptic Ras GTPase activating protein 1 homolog	NP_001106880	acts as a Ras-GTPase activator; activity is inhibited by CaMKII phosphorylation; may inhibit NMDA receptor mediated MAPK signaling [RGD].	NM_001113409	5189938	5208449	18511	233	17	131	14.6	56.2	5194719	5194952
IS	11256	chr4	117674036	117674385	349	2.52	chr4:117673403-117674896				Unknown										1493	130	927	17.4	62.1	117673403	117674896
IS	11268	chr4	174263728	174264167	439	2.52	chr4:174263724-174263992				Unknown										268	21	158	15.7	59	174263724	174263992
IS	11440	chr5	22709470	22709804	334	2.52	chr5:22709498-22709761	Chd7	LCP	+	Intragenic	160393	-628	chromodomain helicase DNA binding protein 7	NP_001101376		NM_001107906	22549236	22710257	161021	263	22	162	16.7	61.6	22709498	22709761
IS	12110	chr8	60631999	60632526	527	2.52	chr8:60632010-60632295	Cspg4	ICP	+	Intragenic	21318	-13725	chondroitin sulfate proteoglycan 4	NP_112284	extracellular matrix protein secreted by many cell types; member of the large chondroitin sulfate proteoglycan (CSPG) family; may be involved with angiogenesis -dependent processes such as wound healing or tumor growth [RGD]. Publication Note: This RefSeq record includes a subset of the publications that are available for this gene. Please see the Entrez Gene record to access additional publicati…	NM_031022	60610834	60645877	35043	285	23	178	16.1	62.5	60632010	60632295
IS	12204	chr8	71357761	71359346	1585	2.52	chr8:71357779-71358403	Tpm1	HCP	-	Promoter	-28	-26787	tropomyosin 1, alpha isoform d	NP_001029243		NM_001034071	71358063	71331304	26759	624	48	401	15.4	64.3	71357779	71358403
IS	9264	chr10	108968366	108968895	529	2.53	chr10:108968590-108968828				Unknown										238	17	140	14.3	58.8	108968590	108968828
IS	10595	chr2	123598744	123599263	519	2.53	chr2:123598886-123599284	Adad1	HCP	+	Promoter	-49	-33765	testis nuclear RNA-binding protein	NP_001006978		NM_001006977	123599134	123632850	33716	398	48	288	24.1	72.4	123598886	123599284
IS	10832	chr20	20110766	20111294	528	2.53	chr20:20110846-20111180				Unknown										334	26	195	15.6	58.4	20110846	20111180
IS	11753	chr6	26341091	26341715	624	2.53	chr6:26341593-26341913	Kif3c	ICP	+	Promoter	-634	-39480	kinesin family member 3C	NP_445938	may be a vesicle associated microtubule motor protein involved in muscle cell function [RGD].	NM_053486	26342387	26381233	38846	320	33	216	20.6	67.5	26341593	26341913
IS	11836	chr7	10166000	10166425	425	2.53	chr7:10165823-10166297	Diras1	ICP	+	Promoter	-5666	-10531	DIRAS family, GTP-binding RAS-like 1	NP_001102457		NM_001108987	10171726	10176591	4865	474	38	324	16	68.4	10165823	10166297
IS	9640	chr12	35116795	35117134	339	2.54	chr12:35116844-35117058	P2rx7	ICP	-	Promoter	201	-42926	purinergic receptor P2X, ligand-gated ion	NP_062129	an ATP receptor; may be involved in fast synaptic transmission and the ATP-mediated lysis of antigen-presenting cells [RGD]. Publication Note: This RefSeq record includes a subset of the publications that are available for this gene. Please see the Entrez Gene record to access additional publications.	NM_019256	35117152	35074025	43127	214	16	124	15	57.9	35116844	35117058
IS	10486	chr19	54977765	54978103	338	2.54	chr19:54975641-54978244				Unknown										2603	239	1739	18.4	66.8	54975641	54978244
IS	10584	chr2	43074334	43074962	628	2.54	chr2:43074526-43074824				Unknown										298	21	176	14.1	59.1	43074526	43074824
IS	10749	chr2	204671568	204671997	429	2.54	chr2:204671544-204671755	LOC691448	ICP	+	Promoter	-32	-45341	hypothetical protein LOC691448	NP_001103110		NM_001109640	204671681	204716990	45309	211	17	139	16.1	65.9	204671544	204671755
IS	10620	chr2	204671588	204672017	429	2.54	chr2:204671544-204671755	LOC691448	ICP	+	Promoter	-32	-45341	hypothetical protein LOC691448	NP_001103110		NM_001109640	204671681	204716990	45309	211	17	139	16.1	65.9	204671544	204671755
IS	10970	chr3	17069778	17070212	434	2.54	chr3:17069990-17070252				Unknown										262	22	166	16.8	63.4	17069990	17070252
IS	12471	chrUn_random	731153	731607	454	2.54	chrUn_random:731067-732868				Unknown										1801	141	1169	15.7	64.9	731067	732868
IS	8769	chr1	118681059	118681499	440	2.55	chr1:118681075-118681302	Trpm1	LCP	+	Intragenic	97673	-19463	transient receptor potential cation channel,	NP_001032823		NM_001037734	118583515	118700651	117136	227	17	130	15	57.3	118681075	118681302
IS	9245	chr10	95365993	95366321	328	2.55	chr10:95366134-95366344	Ace	HCP	+	Intragenic	4902	-15216	angiotensin I-converting enzyme	NP_036676	catalyzes the conversion of angiotensin I to angiotensin II; plays a role in regulation of blood pressure [RGD]. Publication Note: This RefSeq record includes a subset of the publications that are available for this gene. Please see the Entrez Gene record to access additional publications.	NM_012544	95361337	95381455	20118	210	15	128	14.3	61	95366134	95366344
IS	9931	chr14	103623882	103624121	239	2.55	chr14:103624053-103624395				Unknown										342	30	209	17.5	61.1	103624053	103624395
IS	9928	chr14	92656492	92656925	433	2.55	chr14:92656444-92656657	RGD1562979	LCP	+	Intragenic	96351	-786	hypothetical protein LOC305501	NP_001100707		NM_001107237	92560199	92657336	97137	213	19	132	17.8	62	92656444	92656657
IS	10263	chr17	94851618	94852143	525	2.55	chr17:94851802-94852126				Unknown										324	23	185	14.2	57.1	94851802	94852126
IS	10974	chr3	47969394	47969930	536	2.55	chr3:47969444-47969648				Unknown										204	18	112	17.6	54.9	47969444	47969648
IS	11699	chr6	23742723	23742962	239	2.55	chr6:23742649-23742926	Clip4	LCP	-	Downstream	89640	6382	CAP-GLY domain containing linker protein family,	NP_001013964		NM_001013942	23832427	23749169	83258	277	22	166	15.9	59.9	23742649	23742926
IS	11877	chr7	114211476	114211818	342	2.55	chr7:114211189-114213648				Unknown										2459	191	1655	15.5	67.3	114211189	114213648
IS	9176	chr1	263130968	263131497	529	2.56	chr1:263130803-263131208	Tdrd1	HCP	+	Promoter	29	-43225	tudor domain containing 1	NP_001099672		NM_001106202	263130976	263174230	43254	405	44	271	21.7	66.9	263130803	263131208
IS	8713	chr1	72880034	72880273	239	2.56	chr1:72879171-72880262	Ube2m	HCP	+	Promoter	-5950	-9488	ubiquitin-conjugating enzyme E2M (UBC12 homolog,	NP_001101941		NM_001108471	72885666	72889204	3538	1091	122	738	22.4	67.6	72879171	72880262
IS	9265	chr10	109409605	109410030	425	2.56	chr10:109409822-109410068	Baiap2	HCP	+	Intragenic	58745	-3758	brain-specific angiogenesis inhibitor	NP_476544		NM_057196	109351200	109413703	62503	246	23	158	18.7	64.2	109409822	109410068
IS	10243	chr17	17744916	17745148	232	2.56	chr17:17744660-17744908				Unknown										248	24	163	19.4	65.7	17744660	17744908
IS	10444	chr19	20601525	20601954	429	2.56	chr19:20601769-20601976	Zfp423	ICP	+	Intragenic	162864	-137364	zinc finger protein 423	NP_446035	zinc finger protein that interacts with the Olf-1/EBF transcription factor; plays a role in regulation of differentiation of olfactory neurons [RGD].	NM_053583	20439008	20739236	300228	207	17	126	16.4	60.9	20601769	20601976
IS	11028	chr3	168976139	168976665	526	2.56	chr3:168976240-168976539				Unknown										299	26	180	17.4	60.2	168976240	168976539
IS	11924	chr7	139042372	139042901	529	2.56	chr7:139042375-139042876				Unknown										501	46	352	18.4	70.3	139042375	139042876
IS	8690	chr1	21951114	21951595	481	2.57	chr1:21951184-21951399	Taar7c	LCP	-	Downstream	5338	4261	trace amine-associated receptor 7C	NP_001009975		NM_001009975	21956629	21955552	1077	215	18	145	16.7	67.4	21951184	21951399
IS	9222	chr10	56139219	56139553	334	2.57	chr10:56139247-56139492	RGD1563441	HCP	+	Downstream	5946	5273	hypothetical protein LOC497935	NP_001119764		NM_001126292	56133423	56134096	673	245	23	172	18.8	70.2	56139247	56139492
IS	9242	chr10	92962723	92963157	434	2.57	chr10:92962941-92963202	Wnt3	HCP	+	Intragenic	37467	-6542	wingless-related MMTV integration site 3	NP_001099185	mouse homolog promotes neuronal proliferation [RGD].	NM_001105715	92925604	92969613	44009	261	25	167	19.2	64	92962941	92963202
IS	9643	chr12	35918344	35918578	234	2.57	chr12:35917893-35918493	Cux2	LCP	+	Downstream	68101	7779	cut-like homeobox 2	NP_001099401		NM_001105931	35850092	35910414	60322	600	62	409	20.7	68.2	35917893	35918493
IS	10151	chr16	75797186	75797565	379	2.57	chr16:75797126-75797359				Unknown										233	25	152	21.5	65.2	75797126	75797359
IS	10476	chr19	49889825	49890159	334	2.57	chr19:49889811-49890157				Unknown										346	26	228	15	65.9	49889811	49890157
IS	10484	chr19	54652471	54652990	519	2.57	chr19:54652689-54652934				Unknown										245	18	145	14.7	59.2	54652689	54652934
IS	10682	chr2	145006258	145006598	340	2.57	chr2:145006330-145007011	Mab21l1	ICP	+	Promoter	540	-1850	mab-21-like 1	NP_001102967		NM_001109497	145006130	145008520	2390	681	45	402	13.2	59	145006330	145007011
IS	11439	chr5	22698152	22698669	517	2.57	chr5:22698175-22698428	Chd7	LCP	+	Intragenic	149065	-11956	chromodomain helicase DNA binding protein 7	NP_001101376		NM_001107906	22549236	22710257	161021	253	20	154	15.8	60.9	22698175	22698428
IS	8707	chr1	67645393	67645577	184	2.58	chr1:67645639-67645847	Nat14	ICP	-	Downstream	5575	3487	N-acetyltransferase 14	NP_001101936		NM_001108466	67651318	67649230	2088	208	15	137	14.4	65.9	67645639	67645847
IS	9219	chr10	48931709	48932149	440	2.58	chr10:48931669-48931875				Unknown										206	14	113	13.6	54.9	48931669	48931875
IS	9247	chr10	95712469	95712988	519	2.58	chr10:95712697-95712907	Cd79b	LCP	-	Promoter	-6527	-9673	CD79B antigen	NP_598217	B-cell-specific membrane protein [RGD].	NM_133533	95706275	95703129	3146	210	20	124	19	59	95712697	95712907
IS	9237	chr10	91543835	91544169	334	2.58	chr10:91542782-91544381	Grn	LCP	+	Downstream	5068	1352	granulin	NP_058809	plays a role in regulation of epithelial cell growth [RGD].	NM_017113	91538513	91542229	3716	1599	140	945	17.5	59.1	91542782	91544381
IS	9660	chr12	45693535	45693959	424	2.58	chr12:45693666-45693896				Unknown										230	17	121	14.8	52.6	45693666	45693896
IS	9655	chr12	43580920	43581575	655	2.58	chr12:43581128-43581406	Svop	ICP	+	Intragenic	14484	-43719	SV2 related protein	NP_599231	localized to synaptic vesicles and microvesicles in brain and endocrine cells; may play a role in synaptic vesicle transport [RGD].	NM_134404	43566783	43624986	58203	278	23	168	16.5	60.4	43581128	43581406
IS	10123	chr16	7856126	7856653	527	2.58	chr16:7856146-7856412	Ogdhl	LCP	+	Intragenic	19082	-3159	oxoglutarate dehydrogenase-like	NP_001099532		NM_001106062	7837197	7859438	22241	266	20	174	15	65.4	7856146	7856412
IS	10233	chr17	10076919	10077443	524	2.58	chr17:10077146-10077380				Unknown										234	17	135	14.5	57.7	10077146	10077380
IS	10366	chr18	77851680	77852109	429	2.58	chr18:77851807-77852046	Sall3	ICP	-	Downstream	6727	459	sal-like 3	NP_001102362		NM_001108892	77858653	77852385	6268	239	19	127	15.9	53.1	77851807	77852046
IS	11514	chr5	170612809	170613153	344	2.58	chr5:170612769-170612978				Unknown										209	20	112	19.1	53.6	170612769	170612978
IS	12283	chr9	35194162	35194784	622	2.58	chr9:35194273-35194739				Unknown										466	44	308	18.9	66.1	35194273	35194739
IS	9185	chr10	12824269	12824508	239	2.59	chr10:12824024-12824260				Unknown										236	21	153	17.8	64.8	12824024	12824260
IS	10146	chr16	61109628	61109964	336	2.59	chr16:61109682-61109890				Unknown										208	18	138	17.3	66.3	61109682	61109890
IS	10337	chr18	12706345	12706974	629	2.59	chr18:12706548-12706834				Unknown										286	20	167	14	58.4	12706548	12706834
IS	12089	chr8	11804398	11804792	394	2.59	chr8:11804500-11804989	Panx1	HCP	-	Downstream	44648	5007	pannexin 1	NP_955429	forms homomeric intercellular channels, also forms heteromeric channels with pannexin 2; may facilitate electrical communication in the brain [RGD].	NM_199397	11849392	11809751	39641	489	42	326	17.2	66.7	11804500	11804989
IS	12492	chrX	139088251	139088672	421	2.59	chrX:139088219-139088536				Unknown										317	25	189	15.8	59.6	139088219	139088536
IS	10328	chr18	2205856	2206438	582	2.6	chr18:2206090-2206319	Mib1	HCP	+	Intragenic	100103	-18615	mindbomb homolog 1	NP_001100875		NM_001107405	2106101	2224819	118718	229	24	155	21	67.7	2206090	2206319
IS	10801	chr20	6287764	6288288	524	2.6	chr20:6287904-6288134				Unknown										230	19	137	16.5	59.6	6287904	6288134
IS	11608	chr5	146772125	146772839	714	2.6	chr5:146772027-146772563	Gjb3	ICP	-	Promoter	321	-490	gap junction protein, beta 3	NP_062113	may play a role in hearing [RGD].	NM_019240	146772616	146771805	811	536	37	310	13.8	57.8	146772027	146772563
IS	11707	chr6	74325238	74325476	238	2.6	chr6:74324095-74325495				Unknown										1400	122	911	17.4	65.1	74324095	74325495
IS	11915	chr7	135137687	135137926	239	2.6	chr7:135137488-135139132				Unknown										1644	170	1069	20.7	65	135137488	135139132
IS	12091	chr8	12721000	12721614	614	2.6	chr8:12721106-12721385				Unknown										279	23	168	16.5	60.2	12721106	12721385
IS	8794	chr1	174116065	174116584	519	2.61	chr1:174116250-174116565				Unknown										315	21	191	13.3	60.6	174116250	174116565
IS	10140	chr16	46648539	46649153	614	2.61	chr16:46648668-46649092				Unknown										424	31	224	14.6	52.8	46648668	46649092
IS	10143	chr16	50574923	50575456	533	2.61	chr16:50575069-50575285				Unknown										216	17	118	15.7	54.6	50575069	50575285
IS	10670	chr2	123598309	123599218	909	2.61	chr2:123598886-123599284	Adad1	HCP	+	Promoter	-49	-33765	testis nuclear RNA-binding protein	NP_001006978		NM_001006977	123599134	123632850	33716	398	48	288	24.1	72.4	123598886	123599284
IS	10788	chr20	4028467	4028801	334	2.61	chr20:4028446-4028982	Slc44a4	LCP	-	Promoter	-7444	-23559	solute carrier family 44, member 4	NP_997706		NM_212541	4021270	4005155	16115	536	38	359	14.2	67	4028446	4028982
IS	11254	chr4	96484416	96484935	519	2.61	chr4:96484122-96484963				Unknown										841	94	589	22.4	70	96484122	96484963
IS	10992	chr3	136009454	136009685	231	2.62	chr3:136009445-136010890	Pax1	ICP	+	Intragenic	3664	-8682	paired box gene 1	NP_001101257	member of the paired box homeotic gene family; mouse homolog exhibits transcriptional activity and its mutation causes undulating malformations in the murine vertebral column [RGD].	NM_001107787	136006503	136018849	12346	1445	113	894	15.6	61.9	136009445	136010890
IS	11702	chr6	41402920	41403371	451	2.62	chr6:41402938-41403139				Unknown										201	16	112	15.9	55.7	41402938	41403139
IS	9524	chr11	66871959	66872592	633	2.63	chr11:66872072-66872308	Dirc2	ICP	+	Intragenic	42476	-38008	disrupted in renal carcinoma 2	NP_001012017		NM_001012017	66829714	66910198	80484	236	22	145	18.6	61.4	66872072	66872308
IS	9773	chr13	67900023	67900352	329	2.63	chr13:67899827-67900856				Unknown										1029	81	619	15.7	60.2	67899827	67900856
IS	10807	chr20	8956366	8957010	644	2.63	chr20:8956520-8956815				Unknown										295	23	167	15.6	56.6	8956520	8956815
IS	10833	chr20	21493482	21493912	430	2.63	chr20:21493611-21493859	Zfp365	LCP	+	Intragenic	3208	-21108	zinc finger protein 365	NP_001020316		NM_001025145	21490527	21514843	24316	248	20	141	16.1	56.9	21493611	21493859
IS	12101	chr8	31912524	31913152	628	2.63	chr8:31912765-31912966				Unknown										201	17	116	16.9	57.7	31912765	31912966
IS	12517	chrX	81332311	81333512	1201	2.63	chrX:81332993-81333252	LOC367830	ICP	+	Promoter	113	-50621	hypothetical protein LOC367830	NP_001032288		NM_001037211	81333009	81383743	50734	259	23	151	17.8	58.3	81332993	81333252
IS	12484	chrX	81332783	81333487	704	2.63	chrX:81332993-81333252	LOC367830	ICP	+	Promoter	113	-50621	hypothetical protein LOC367830	NP_001032288		NM_001037211	81333009	81383743	50734	259	23	151	17.8	58.3	81332993	81333252
IS	8824	chr1	248452333	248452952	619	2.64	chr1:248452574-248452788				Unknown										214	17	135	15.9	63.1	248452574	248452788
IS	8777	chr1	135624719	135625143	424	2.64	chr1:135624735-135625011	Anpep	LCP	-	Promoter	-5665	-24123	kidney aminopeptidase M	NP_112274	a cell surface Zinc-peptidase [RGD]. Publication Note: This RefSeq record includes a subset of the publications that are available for this gene. Please see the Entrez Gene record to access additional publications.	NM_031012	135619208	135600750	18458	276	25	176	18.1	63.8	135624735	135625011
IS	9263	chr10	108451419	108451753	334	2.64	chr10:108451470-108451677	C1qtnf1	LCP	+	Intragenic	19590	-519	C1q and tumor necrosis factor related protein 1	NP_001007676		NM_001007675	108431983	108452092	20109	207	16	126	15.5	60.9	108451470	108451677
IS	9187	chr10	12876238	12877542	1304	2.64	chr10:12876282-12876494	Zscan10	LCP	+	Intragenic	8664	-1300	zinc finger and SCAN domain containing 10	NP_001100451		NM_001106981	12867724	12877688	9964	212	17	130	16	61.3	12876282	12876494
IS	9187	chr10	12876238	12877542	1304	2.64	chr10:12877020-12877522	Zscan10	LCP	+	Intragenic	9547	-417	zinc finger and SCAN domain containing 10	NP_001100451		NM_001106981	12867724	12877688	9964	502	39	323	15.5	64.3	12877020	12877522
IS	9930	chr14	100796835	100797368	533	2.64	chr14:100796834-100797571	Spred2	HCP	+	Intragenic	98661	-514	sprouty-related, EVH1 domain containing 2	NP_001040559		NM_001047094	100698541	100797716	99175	737	66	426	17.9	57.8	100796834	100797571
IS	10463	chr19	42420300	42420819	519	2.64	chr19:42420531-42420748				Unknown										217	16	115	14.7	53	42420531	42420748
IS	10628	chr2	247061981	247062505	524	2.64	chr2:247062047-247062423				Unknown										376	30	215	16	57.2	247062047	247062423
IS	10609	chr2	182511923	182512447	524	2.64	chr2:182512153-182512388	Crtc2	HCP	+	Downstream	15509	5923	CREB regulated transcription coactivator 2	NP_001029067		NM_001033895	182496761	182506347	9586	235	19	159	16.2	67.7	182512153	182512388
IS	10959	chr3	4639141	4639764	623	2.64	chr3:4639287-4639489				Unknown										202	16	142	15.8	70.3	4639287	4639489
IS	11475	chr5	153319484	153320017	533	2.64	chr5:153319702-153319965				Unknown										263	21	165	16	62.7	153319702	153319965
IS	11886	chr7	116497764	116498418	654	2.64	chr7:116497941-116498273				Unknown										332	29	212	17.5	63.9	116497941	116498273
IS	12451	chrUn	62131491	62132075	584	2.64	chrUn:62131141-62132115				Unknown										974	91	664	18.7	68.2	62131141	62132115
IS	10352	chr18	30640641	30641253	612	2.65	chr18:30640739-30641013	Pcdhga9	ICP	+	Promoter	-4888	-113329	protocadherin gamma subfamily A, 9	NP_001032235	member of cadherin superfamily (cadherins); may mediate Sertoli-germ cell interactions [RGD].	NM_001037158	30645764	30754205	108441	274	19	146	13.9	53.3	30640739	30641013
IS	10838	chr20	44640874	44641593	719	2.65	chr20:44641112-44641330	Cdc2l6	HCP	+	Intragenic	113759	-28807	cell division cycle 2-like 6 (CDK8-like)	NP_001101104		NM_001107634	44527462	44670028	142566	218	16	115	14.7	52.8	44641112	44641330
IS	11468	chr5	147992882	147993311	429	2.65	chr5:147992698-147993177	A3galt2	LCP	+	Intragenic	11934	-1204	iGb3 synthase	NP_612533	UDP-galactose: beta-d-galactosyl-1,4-glucosylceramide alpha-1, 3-galactosyltransferase; involved in the synthesis of the isoglobo-series of glycosphingolipids [RGD].	NM_138524	147981003	147994141	13138	479	40	300	16.7	62.6	147992698	147993177
IS	11701	chr6	28525596	28526220	624	2.65	chr6:28525730-28525968				Unknown										238	22	167	18.5	70.2	28525730	28525968
IS	11921	chr7	137969457	137970082	625	2.65	chr7:137969661-137969947				Unknown										286	21	175	14.7	61.2	137969661	137969947
IS	11893	chr7	120449161	120449785	624	2.65	chr7:120449347-120449671	Mei1	ICP	+	Promoter	96	-53311	meiosis defective 1	NP_001124027		NM_001130555	120449413	120502820	53407	324	31	213	19.1	65.7	120449347	120449671
IS	12302	chr9	90580164	90580793	629	2.65	chr9:90580364-90580663				Unknown										299	24	190	16.1	63.5	90580364	90580663
IS	8742	chr1	85313419	85314298	879	2.66	chr1:85313348-85313599				Unknown										251	19	177	15.1	70.5	85313348	85313599
IS	8742	chr1	85313419	85314298	879	2.66	chr1:85313978-85314254	Lrfn3	ICP	-	Promoter	279	-5200	leucine rich repeat and fibronectin type III	NP_001100972		NM_001107502	85314395	85308916	5479	276	25	174	18.1	63	85313978	85314254
IS	8706	chr1	67587696	67588029	333	2.66	chr1:67587496-67588740	Zfp579	LCP	+	Intragenic	1893	-1280	zinc finger protein 579	NP_001119748		NM_001126276	67586225	67589398	3173	1244	99	850	15.9	68.3	67587496	67588740
IS	9895	chr14	5104854	5105103	249	2.66	chr14:5105103-5105304				Unknown										201	18	102	17.9	50.7	5105103	5105304
IS	9904	chr14	8030727	8031156	429	2.66	chr14:8030748-8031020				Unknown										272	23	166	16.9	61	8030748	8031020
IS	10035	chr15	80633738	80634197	459	2.66	chr15:80633854-80634125				Unknown										271	18	145	13.3	53.5	80633854	80634125
IS	10319	chr18	115622	116141	519	2.66	chr18:115651-116085	F8	LCP	+	Promoter	-5265	-46140	coagulation factor VIII	NP_899160	human homolog is a cofactor for factor IXa; involved in blood coagulation [RGD].	NM_183331	121133	162008	40875	434	35	266	16.1	61.3	115651	116085
IS	10592	chr2	114891007	114891446	439	2.66	chr2:114891014-114891217	Evi1	ICP	-	Promoter	-8439	-76707	ecotropic viral integration site 1	NP_001099893		NM_001106423	114882676	114814408	68268	203	18	114	17.7	56.2	114891014	114891217
IS	11712	chr6	106514064	106514558	494	2.66	chr6:106514288-106514526				Unknown										238	16	149	13.4	62.6	106514288	106514526
IS	11871	chr7	72785302	72786021	719	2.66	chr7:72785497-72785788				Unknown										291	28	185	19.2	63.6	72785497	72785788
IS	8755	chr1	95479982	95480216	234	2.67	chr1:95479592-95480406	Bcl2l12	LCP	-	Promoter	-8851	-17571	BCL2-like 12 (proline rich)	NP_001101950		NM_001108480	95471148	95462428	8720	814	84	540	20.6	66.3	95479592	95480406
IS	8724	chr1	78923412	78923929	517	2.67	chr1:78923393-78923732	Klc3	LCP	-	Promoter	-7802	-11391	kinesin light chain 3	NP_612529	light chain of kinesin; may be involved in cargo binding and regulation of kinesin activity [RGD].	NM_138520	78915760	78912171	3589	339	27	220	15.9	64.9	78923393	78923732
IS	9520	chr11	43824877	43825458	581	2.67	chr11:43825105-43825312	RGD1309437	ICP	+	Intragenic	61221	-243401	hypothetical protein LOC288176	NP_001013888		NM_001013866	43763987	44068609	304622	207	29	157	28	75.8	43825105	43825312
IS	9612	chr12	12174527	12175056	529	2.67	chr12:12174237-12175047	Zfp469	HCP	+	Intragenic	32048	-64798	trinucleotide repeat containing 18	NP_001100593		NM_001107123	12142594	12239440	96846	810	62	548	15.3	67.7	12174237	12175047
IS	9925	chr14	86238415	86238885	470	2.67	chr14:86238397-86238749	Ankrd36	ICP	+	Intragenic	22434	-26824	ankyrin repeat domain 36	NP_941956	may play a role in spermatogenesis [RGD].	NM_198684	86216139	86265397	49258	352	43	238	24.4	67.6	86238397	86238749
IS	10014	chr15	2678088	2678711	623	2.67	chr15:2678109-2678565	Dupd1	LCP	+	Intragenic	29636	-10636	dual specificity phosphatase and pro isomerase	NP_001101838		NM_001108368	2648701	2688973	40272	456	47	301	20.6	66	2678109	2678565
IS	10809	chr20	9397813	9398139	326	2.67	chr20:9397862-9398066	Abcg1	HCP	+	Intragenic	7480	-61610	ATP-binding cassette, sub-family G (WHITE),	NP_445954	ATP-binding cassette (ABC) half-transporter that facilitates the efflux of excess cholesterol from macrophages and may play an important role in cholesterol homeostasis [RGD].	NM_053502	9390484	9459574	69090	204	17	118	16.7	57.8	9397862	9398066
IS	11499	chr5	166089239	166089861	622	2.67	chr5:166089486-166089689				Unknown										203	16	132	15.8	65	166089486	166089689
IS	11923	chr7	138519350	138519871	521	2.67	chr7:138519508-138519886	Lass5	ICP	-	Promoter	-6050	-44547	LAG1 homolog, ceramide synthase 5	NP_001102463		NM_001108993	138513647	138475150	38497	378	32	231	16.9	61.1	138519508	138519886
IS	12139	chr8	124935700	124936639	939	2.67	chr8:124935733-124935958				Unknown										225	23	145	20.4	64.4	124935733	124935958
IS	12139	chr8	124935700	124936639	939	2.67	chr8:124936413-124936705				Unknown										292	22	179	15.1	61.3	124936413	124936705
IS	12129	chr8	115412814	115413393	579	2.67	chr8:115413043-115413266	Ltf	LCP	+	Promoter	-4609	-27455	lactotransferrin	NP_001100334		NM_001106864	115417763	115440609	22846	223	23	146	20.6	65.5	115413043	115413266
IS	8744	chr1	87122803	87123132	329	2.68	chr1:87122847-87123058				Unknown										211	18	119	17.1	56.4	87122847	87123058
IS	9526	chr11	67197822	67198244	422	2.68	chr11:67197763-67197996	Pdia5	ICP	+	Intragenic	80131	-6601	protein disulfide isomerase-associated 5	NP_001014147		NM_001014125	67117748	67204480	86732	233	16	137	13.7	58.8	67197763	67197996
IS	9897	chr14	7036658	7037194	536	2.68	chr14:7036567-7037060				Unknown										493	33	280	13.4	56.8	7036567	7037060
IS	10323	chr18	226527	227059	532	2.68	chr18:226764-226978				Unknown										214	16	122	15	57	226764	226978
IS	10452	chr19	29601837	29602461	624	2.68	chr19:29601946-29602207				Unknown										261	17	148	13	56.7	29601946	29602207
IS	10601	chr2	145006323	145007043	720	2.68	chr2:145006330-145007011	Mab21l1	ICP	+	Promoter	540	-1850	mab-21-like 1	NP_001102967		NM_001109497	145006130	145008520	2390	681	45	402	13.2	59	145006330	145007011
IS	8807	chr1	201267358	201267810	452	2.69	chr1:201267599-201267801	Pkp3	LCP	+	Promoter	-9089	-20099	plakophilin 3	NP_001099785		NM_001106315	201276789	201287799	11010	202	20	129	19.8	63.9	201267599	201267801
IS	8714	chr1	72915419	72916038	619	2.69	chr1:72915654-72915864	Slc27a5	ICP	+	Promoter	-8870	-19462	bile acid CoA ligase	NP_077057	catalyzes the first of two steps in the conjugation of bile acids with the amino acids glycine and taurine [RGD].	NM_024143	72924629	72935221	10592	210	15	121	14.3	57.6	72915654	72915864
IS	9249	chr10	98575275	98575976	701	2.69	chr10:98575487-98575709				Unknown										222	17	132	15.3	59.5	98575487	98575709
IS	10976	chr3	52766449	52767113	664	2.69	chr3:52766689-52766894	LOC499806	ICP	+	Intragenic	36060	-56	hypothetical protein LOC499806	NP_001019482		NM_001024311	52730731	52766847	36116	205	16	116	15.6	56.6	52766689	52766894
IS	11908	chr7	132860643	132861285	642	2.69	chr7:132860790-132861003				Unknown										213	19	113	17.8	53.1	132860790	132861003
IS	12308	chr9	105937278	105937802	524	2.69	chr9:105937360-105937612				Unknown										252	20	155	15.9	61.5	105937360	105937612
IS	12272	chr9	5898919	5899389	470	2.69	chr9:5898917-5899802	Dazl	HCP	+	Promoter	256	-16476	deleted in azoospermia-like	NP_001102884		NM_001109414	5899103	5915835	16732	885	76	607	17.2	68.6	5898917	5899802
IS	8693	chr1	29438679	29439506	827	2.7	chr1:29438669-29439631				Unknown										962	84	603	17.5	62.7	29438669	29439631
IS	9902	chr14	7900245	7900769	524	2.7	chr14:7900452-7900722	Mapk10	ICP	+	Intragenic	180993	-110107	mitogen activated protein kinase 10	NP_036938	a stress-activated protein kinase [RGD].	NM_012806	7719594	8010694	291100	270	20	150	14.8	55.6	7900452	7900722
IS	10483	chr19	53844758	53845473	715	2.7	chr19:53844989-53845212	Gas8	ICP	+	Intragenic	6593	-12526	growth arrest specific 8	NP_001034119		NM_001039030	53838507	53857626	19119	223	17	140	15.2	62.8	53844989	53845212
IS	10693	chr2	172385525	172386351	826	2.7	chr2:172385284-172385485	Gria2	ICP	-	Promoter	-99	-120226	glutamate receptor, ionotropic, AMPA 2 isoform	NP_058957	Glutamate receptors are the predominant excitatory neurotransmitter receptors in the mammalian brain and are activated in a variety of normal neurophysiologic processes. This gene product belongs to a family of glutamate receptors that are sensitive to alpha-amino-3-hydroxy-5-methyl-4-isoxazole propionate (AMPA), and function as ligand-activated cation channels. These channels are assembled from …	NM_017261	172385285	172265158	120127	201	18	134	17.9	66.7	172385284	172385485
IS	11022	chr3	161526680	161527195	515	2.7	chr3:161526729-161526933				Unknown										204	18	121	17.6	59.3	161526729	161526933
IS	11452	chr5	65239216	65239846	630	2.7	chr5:65239292-65239630	RGD1308165	ICP	+	Intragenic	12535	-10296	hypothetical protein LOC362516	NP_001102134		NM_001108664	65226926	65249757	22831	338	29	211	17.2	62.4	65239292	65239630
IS	11728	chr6	137851291	137851811	520	2.7	chr6:137851475-137851794	Mta1	LCP	+	Intragenic	191634	-292348	metastasis associated 1	NP_072110	high expression of this protein correlates with the metastatic potential of cells; may have a role in gene regulation [RGD].	NM_022588	137660000	138143982	483982	319	21	178	13.2	55.8	137851475	137851794
IS	11931	chr7	141803493	141804201	708	2.7	chr7:141803686-141803982	Hoxc4	LCP	+	Downstream	6901	4358	homeobox C4	NP_001103354	mouse homolog is a homeobox transcription factor [RGD]. Sequence Note: The RefSeq transcript and protein were derived from genomic sequence to make the sequence consistent with the reference genome assembly. The genomic coordinates used for the transcript record were based on alignments.	NM_001109884	141796933	141799476	2543	296	25	187	16.9	63.2	141803686	141803982
IS	12127	chr8	114757859	114758296	437	2.7	chr8:114757574-114758295	Scap	HCP	+	Intragenic	51456	-3407	SREBF chaperone	NP_001094436		NM_001100966	114706478	114761341	54863	721	49	454	13.6	63	114757574	114758295
IS	8781	chr1	139137526	139137970	444	2.71	chr1:139134146-139138461				Unknown										4315	327	2632	15.2	61	139134146	139138461
IS	8815	chr1	209506164	209506687	523	2.71	chr1:209506078-209506555				Unknown										477	40	313	16.8	65.6	209506078	209506555
IS	8761	chr1	96101397	96101641	244	2.71	chr1:96101425-96102062	Rasip1	LCP	+	Intragenic	5637	-6798	Ras interacting protein 1	NP_001099731		NM_001106261	96096106	96108541	12435	637	60	442	18.8	69.4	96101425	96102062
IS	8772	chr1	128588810	128589334	524	2.71	chr1:128588875-128589240	Rgma	HCP	+	Intragenic	41659	-2247	RGM domain family, member A	NP_001100994		NM_001107524	128547398	128591304	43906	365	28	229	15.3	62.7	128588875	128589240
IS	9214	chr10	45252865	45253589	724	2.71	chr10:45253016-45253396	Hist3h2bb	HCP	-	Degenerate_Promoter	-7524	-8272	histone cluster 3, H2bb	NP_001103111		NM_001109641	45245682	45244934	748	380	37	235	19.5	61.8	45253016	45253396
IS	9214	chr10	45252865	45253589	724	2.71	chr10:45253016-45253396	LOC691496	ICP	+	Degenerate_Promoter	214	-197	hypothetical protein LOC691496	NP_001103112		NM_001109642	45252992	45253403	411	380	37	235	19.5	61.8	45253016	45253396
IS	10487	chr19	56249050	56249769	719	2.71	chr19:56249231-56249566	Kcnk1	ICP	+	Intragenic	32799	-5901	potassium channel, subfamily K, member 1	NP_067720	a putative potassium channel with two P domains [RGD]. Sequence Note: This RefSeq record was created from transcript and genomic sequence data because no single transcript was available for the full length of the gene. The extent of this transcript is supported by transcript alignments and orthologous data.	NM_021688	56216599	56255299	38700	335	25	198	14.9	59.1	56249231	56249566
IS	10972	chr3	38882191	38882425	234	2.71	chr3:38882182-38883039				Unknown										857	89	587	20.8	68.5	38882182	38883039
IS	11448	chr5	58918765	58919569	804	2.71	chr5:58917901-58919722				Unknown										1821	155	1122	17	61.6	58917901	58919722
IS	11486	chr5	158593653	158594368	715	2.71	chr5:158593892-158594095				Unknown										203	16	125	15.8	61.6	158593892	158594095
IS	11872	chr7	110793063	110793592	529	2.71	chr7:110793174-110793459				Unknown										285	24	167	16.8	58.6	110793174	110793459
IS	11858	chr7	24769786	24770418	632	2.71	chr7:24770014-24770238	Pmch	ICP	+	Promoter	-8006	-9322	pro-melanin-concentrating hormone	NP_036757	cyclic neuropeptide; induces hippocampal synaptic transmission [RGD]. Publication Note: This RefSeq record includes a subset of the publications that are available for this gene. Please see the Entrez Gene record to access additional publications.	NM_012625	24778132	24779448	1316	224	19	138	17	61.6	24770014	24770238
IS	11926	chr7	139768133	139768850	717	2.71	chr7:139768330-139768629	Scn8a	ICP	+	Intragenic	82300	-25811	sodium channel, voltage-gated, type 8, alpha	NP_062139	tetrodotoxin-sensitive sodium channel alpha subunit [RGD].	NM_019266	139686179	139794290	108111	299	25	176	16.7	58.9	139768330	139768629
IS	9634	chr12	33110162	33110868	706	2.72	chr12:33110395-33110613				Unknown										218	19	126	17.4	57.8	33110395	33110613
IS	9619	chr12	17860296	17860730	434	2.72	chr12:17860165-17860739	Gal3st4	LCP	-	Degenerate_Promoter	-3139	-11897	galactose-3-O-sulfotransferase 4	NP_001102534		NM_001109064	17857313	17848555	8758	574	43	364	15	63.4	17860165	17860739
IS	9725	chr12	29036185	29037568	1383	2.72	chr12:29036387-29036699	Piwil1	ICP	-	Promoter	-52	-20885	piwi like homolog 1	NP_001102323		NM_001108853	29036491	29015658	20833	312	27	215	17.3	68.9	29036387	29036699
IS	9619	chr12	17860296	17860730	434	2.72	chr12:17860165-17860739	Stag3	HCP	+	Degenerate_Promoter	-4820	-36540	stromal antigen 3	NP_446182	testis-specific protein which associates with the synaptonemal complex [RGD].	NM_053730	17865272	17896992	31720	574	43	364	15	63.4	17860165	17860739
IS	10142	chr16	47234360	47234714	354	2.72	chr16:47234340-47234661	Dctd	HCP	-	Downstream	27397	6479	dCMP deaminase	NP_001013904		NM_001013882	47261897	47240979	20918	321	24	199	15	62	47234340	47234661
IS	10988	chr3	118849571	118850192	621	2.72	chr3:118849671-118850169	Hspa12b	LCP	+	Intragenic	16886	-1496	heat shock protein 12B	NP_001101248		NM_001107778	118833034	118851416	18382	498	43	326	17.3	65.5	118849671	118850169
IS	11911	chr7	133633488	133633824	336	2.72	chr7:133633544-133633746				Unknown										202	16	115	15.8	56.9	133633544	133633746
IS	8808	chr1	204900612	204901332	720	2.73	chr1:204900619-204901302	Cttn	HCP	-	Promoter	261	-35192	cortactin isoform B	NP_068640	component of clathrin-coated pits; involved in receptor-mediated endocytosis [RGD].	NM_021868	204901221	204865768	35453	683	50	460	14.6	67.3	204900619	204901302
IS	9238	chr10	91583956	91584480	524	2.73	chr10:91584151-91584453				Unknown										302	24	180	15.9	59.6	91584151	91584453
IS	9774	chr13	70402594	70402833	239	2.73	chr13:70402312-70402557				Unknown										245	18	148	14.7	60.4	70402312	70402557
IS	9923	chr14	83070788	83071327	539	2.73	chr14:83070896-83071102				Unknown										206	15	127	14.6	61.7	83070896	83071102
IS	10250	chr17	25122180	25122794	614	2.73	chr17:25122370-25122573	Atxn1	LCP	+	Intragenic	403089	-15799	spinocerebellar ataxia 1	NP_036858	human homolog contains an expanded CAG nucleotide repeat region that causes the neurodegenerative disorder spinocerebellar ataxia type 1 (SCA1) [RGD]. Sequence Note: The sequence X91619.1 is from a chimeric clone. Only the ataxin 1 region was propagated into this RefSeq record.	NM_012726	24719382	25138270	418888	203	15	134	14.8	66	25122370	25122573
IS	10230	chr17	746244	746486	242	2.73	chr17:745762-749486	Irx2	HCP	-	Promoter	1326	-4091	Iroquois related homeobox 2	NP_001034594		NM_001039505	748950	743533	5417	3724	308	2328	16.5	62.5	745762	749486
IS	10470	chr19	48245026	48245653	627	2.73	chr19:48245271-48245476				Unknown										205	17	111	16.6	54.1	48245271	48245476
IS	11016	chr3	160016023	160016927	904	2.73	chr3:160016014-160017106				Unknown										1092	73	667	13.4	61.1	160016014	160017106
IS	10986	chr3	116730108	116730627	519	2.73	chr3:116730311-116730584	Chchd5	HCP	+	Promoter	-4004	-4959	coiled-coil-helix-coiled-coil-helix domain	NP_001099979		NM_001106509	116734451	116735406	955	273	20	158	14.7	57.9	116730311	116730584
IS	11231	chr4	6061675	6062199	524	2.73	chr4:6061752-6061975				Unknown										223	19	148	17	66.4	6061752	6061975
IS	11730	chr6	138191204	138191724	520	2.73	chr6:138190247-138191832				Unknown										1585	126	1006	15.9	63.5	138190247	138191832
IS	11811	chr6	134020819	134021953	1134	2.73	chr6:134021479-134022356	Dlk1	HCP	+	Promoter	-98	-7158	delta-like 1	NP_446196	involved in maintaining the undifferentiated status of the preadipocyte [RGD].	NM_053744	134022015	134029075	7060	877	79	511	18	58.3	134021479	134022356
IS	11727	chr6	137724198	137724825	627	2.73	chr6:137724384-137724712	Mta1	LCP	+	Intragenic	64548	-419434	metastasis associated 1	NP_072110	high expression of this protein correlates with the metastatic potential of cells; may have a role in gene regulation [RGD].	NM_022588	137660000	138143982	483982	328	23	222	14	67.7	137724384	137724712
IS	11697	chr6	21594696	21595407	711	2.73	chr6:21594887-21595194	Xdh	LCP	+	Downstream	177356	5025	xanthine dehydrogenase	NP_058850	catalyzes the conversion of xanthine + NAD+ + H2O to urate + NADH + H+; may be involved in response to aluminium and aluminium toxicity [RGD]. Publication Note: This RefSeq record includes a subset of the publications that are available for this gene. Please see the Entrez Gene record to access additional publications.	NM_017154	21417684	21590015	172331	307	23	162	15	52.8	21594887	21595194
IS	12300	chr9	86597629	86598155	526	2.73	chr9:86597665-86597896	Inpp5d	LCP	+	Intragenic	21040	-84458	inositol polyphosphate-5-phosphatase D	NP_062184	phosphatase involved in the inhibitory action of the mast cell function-associated antigen [RGD].	NM_019311	86576740	86682238	105498	231	17	120	14.7	51.9	86597665	86597896
IS	9654	chr12	43097286	43097870	584	2.74	chr12:43097412-43097662				Unknown										250	27	183	21.6	73.2	43097412	43097662
IS	10030	chr15	33219780	33220202	422	2.74	chr15:33219201-33221041	Jph4	LCP	-	Promoter	938	-5578	junctophilin 4	NP_001003711		NM_001003711	33221059	33214543	6516	1840	135	1190	14.7	64.7	33219201	33221041
IS	11247	chr4	76689082	76689699	617	2.74	chr4:76689074-76690057	Zfp775	HCP	+	Promoter	-4517	-22042	zinc finger protein 775	NP_001101329		NM_001107859	76694082	76711607	17525	983	74	632	15.1	64.3	76689074	76690057
IS	11909	chr7	133032406	133033130	724	2.74	chr7:133032522-133032989				Unknown										467	37	272	15.8	58.2	133032522	133032989
IS	8768	chr1	118368252	118368771	519	2.75	chr1:118368246-118368518				Unknown										272	35	191	25.7	70.2	118368246	118368518
IS	8802	chr1	187294806	187295238	432	2.75	chr1:187294613-187295129	Trim72	LCP	+	Intragenic	6770	-1090	tripartite motif-containing 72	NP_001071143		NM_001077675	187288101	187295961	7860	516	41	330	15.9	64	187294613	187295129
IS	9616	chr12	15314319	15314938	619	2.75	chr12:15314505-15314824	Tmem184a	LCP	+	Downstream	13118	4807	transmembrane protein 184A	NP_001020584		NM_001025413	15301546	15309857	8311	319	28	208	17.6	65.2	15314505	15314824
IS	10036	chr15	102831639	102832080	441	2.75	chr15:102831563-102831838				Unknown										275	21	173	15.3	62.9	102831563	102831838
IS	10154	chr16	81327371	81328010	639	2.75	chr16:81327594-81327832	Proz	ICP	-	Promoter	-5727	-16309	protein Z, vitamin K-dependent plasma	NP_001100795		NM_001107325	81321986	81311404	10582	238	19	140	16	58.8	81327594	81327832
IS	10359	chr18	61524417	61525038	621	2.75	chr18:61524574-61524944	LOC502176	LCP	+	Intragenic	37923	-11	hypothetical protein LOC502176	NP_001020228		NM_001025057	61486836	61524770	37934	370	25	217	13.5	58.6	61524574	61524944
IS	11508	chr5	168256305	168256924	619	2.75	chr5:168256305-168257647				Unknown										1342	157	906	23.4	67.5	168256305	168257647
IS	11515	chr5	170803249	170803768	519	2.75	chr5:170803282-170803520				Unknown										238	18	154	15.1	64.7	170803282	170803520
IS	11895	chr7	123506428	123506952	524	2.75	chr7:123506556-123506801				Unknown										245	24	165	19.6	67.3	123506556	123506801
IS	11897	chr7	123979329	123979848	519	2.75	chr7:123979329-123979632				Unknown										303	25	187	16.5	61.7	123979329	123979632
IS	9201	chr10	20939548	20940172	624	2.76	chr10:20939691-20940103				Unknown										412	32	245	15.5	59.5	20939691	20940103
IS	9221	chr10	53793350	53793961	611	2.76	chr10:53793436-53793754	Myh3	LCP	+	Intragenic	16738	-7082	myosin, heavy polypeptide 3	NP_036736	heavy chain of myosin; involved in muscle contraction [RGD].	NM_012604	53776857	53800677	23820	318	27	204	17	64.2	53793436	53793754
IS	9900	chr14	7328000	7328241	241	2.76	chr14:7327769-7327976				Unknown										207	15	111	14.5	53.6	7327769	7327976
IS	10590	chr2	105348444	105348806	362	2.76	chr2:105348457-105348678				Unknown										221	17	138	15.4	62.4	105348457	105348678
IS	11262	chr4	136045300	136045824	524	2.76	chr4:136045352-136045554				Unknown										202	20	129	19.8	63.9	136045352	136045554
IS	11914	chr7	134870382	134870832	450	2.76	chr7:134870304-134870589				Unknown										285	20	145	14	50.9	134870304	134870589
IS	11851	chr7	11547011	11547530	519	2.76	chr7:11547021-11547498	Cdc34	LCP	-	Promoter	-7318	-12717	cell division cycle 34 homolog	NP_001013121		NM_001013103	11539941	11534542	5399	477	41	322	17.2	67.5	11547021	11547498
IS	12022	chr7	117603708	117604406	698	2.76	chr7:117603123-117603800	Kcnj4	ICP	-	Promoter	366	-1738	potassium inwardly-rectifying channel J4	NP_446322	inwardly-rectifying potassium channel [RGD].	NM_053870	117603827	117601723	2104	677	59	420	17.4	62	117603123	117603800
IS	8773	chr1	128843900	128844494	594	2.77	chr1:128844014-128844237				Unknown										223	25	156	22.4	70	128844014	128844237
IS	8786	chr1	158327639	158328069	430	2.77	chr1:158327679-158327902				Unknown										223	16	143	14.3	64.1	158327679	158327902
IS	9220	chr10	50369941	50370279	338	2.77	chr10:50369963-50370224				Unknown										261	19	138	14.6	52.9	50369963	50370224
IS	9228	chr10	75906931	75907365	434	2.77	chr10:75907120-75907434	Mtmr4	LCP	+	Downstream	23752	837	myotubularin related protein 4	NP_001099297		NM_001105827	75883525	75906440	22915	314	42	240	26.8	76.4	75907120	75907434
IS	10234	chr17	10199190	10199627	437	2.77	chr17:10199178-10199409				Unknown										231	22	130	19	56.3	10199178	10199409
IS	10238	chr17	13212468	13212891	423	2.77	chr17:13212364-13212622				Unknown										258	18	149	14	57.8	13212364	13212622
IS	10334	chr18	12348754	12349473	719	2.77	chr18:12348968-12349233				Unknown										265	21	144	15.8	54.3	12348968	12349233
IS	10340	chr18	29662931	29663365	434	2.77	chr18:29662902-29663669	Pcdha2	ICP	+	Promoter	-7252	-264745	protocadherin alpha 2	NP_955798	member of a family of synaptic cadherins and Reelin receptors [RGD].	NM_199504	29670537	29928030	257493	767	61	453	15.9	59.1	29662902	29663669
IS	10737	chr2	198164590	198165794	1204	2.77	chr2:198164148-198164720	Sycp1	ICP	-	Promoter	177	-174818	synaptonemal complex protein 1	NP_036942	component of the transverse filaments of synaptonemal complexes (SCs) that are formed between homologous chromosomes during meiotic prophase; may be involved in chromosome pairing and recombination [RGD].	NM_012810	198164611	197989616	174995	572	43	367	15	64.2	198164148	198164720
IS	10810	chr20	10281567	10281991	424	2.77	chr20:10281692-10281939	Snf1lk	HCP	-	Downstream	9920	387	SNF1-like kinase	NP_067725	inhibits CREB binding and transcription of cAMP-responsive element (CRE)-dependent genes Cyp11A and Star [RGD].	NM_021693	10291735	10282202	9533	247	24	153	19.4	61.9	10281692	10281939
IS	10979	chr3	67868286	67868623	337	2.77	chr3:67868344-67868546	Ctnnd1	ICP	-	Promoter	-8158	-58843	catenin (cadherin associated protein), delta 1	NP_001101210		NM_001107740	67860287	67809602	50685	202	23	135	22.8	66.8	67868344	67868546
IS	8820	chr1	228844081	228844605	524	2.78	chr1:228844088-228844390				Unknown										302	24	187	15.9	61.9	228844088	228844390
IS	8833	chr1	265308707	265309319	612	2.78	chr1:265308853-265309243				Unknown										390	28	239	14.4	61.3	265308853	265309243
IS	8689	chr1	15676667	15677288	621	2.78	chr1:15676719-15677110				Unknown										391	29	220	14.8	56.3	15676719	15677110
IS	9881	chr13	103082232	103083518	1286	2.78	chr13:103083131-103083461	RGD1309586	HCP	+	Promoter	139	-3031	hypothetical protein LOC364073	NP_001102328		NM_001108858	103083157	103086327	3170	330	31	201	18.8	60.9	103083131	103083461
IS	9935	chr14	2470912	2471547	635	2.78	chr14:2471189-2471433	RGD69425	ICP	-	Promoter	-65	-1537	ubiquitin-conjugating enzyme	NP_112263	ubiquitin-conjugating enzyme (E2 class); mediates the targeting of abnormal and short-lived proteins for degradation [RGD].	NM_031001	2471246	2469774	1472	244	22	163	18	66.8	2471189	2471433
IS	10451	chr19	28900131	28900829	698	2.78	chr19:28900375-28900581				Unknown										206	22	142	21.4	68.9	28900375	28900581
IS	10439	chr19	10549986	10550514	528	2.78	chr19:10550217-10550454	Ccdc102a	HCP	+	Intragenic	10100	-8150	coiled-coil domain containing 102A	NP_001101907		NM_001108437	10540235	10558485	18250	237	18	157	15.2	66.2	10550217	10550454
IS	11446	chr5	48643452	48643873	421	2.78	chr5:48643632-48643956				Unknown										324	26	202	16	62.3	48643632	48643956
IS	11731	chr6	138512749	138513403	654	2.78	chr6:138512961-138513228				Unknown										267	18	150	13.5	56.2	138512961	138513228
IS	11847	chr7	11160797	11161226	429	2.78	chr7:11160510-11161412	Sbno2	HCP	+	Intragenic	43127	-902	strawberry notch homolog 2	NP_001101538		NM_001108068	11117834	11161863	44029	902	62	587	13.7	65.1	11160510	11161412
IS	8738	chr1	84134301	84135015	714	2.79	chr1:84134300-84135053				Unknown										753	75	491	19.9	65.2	84134300	84135053
IS	8790	chr1	163080475	163081189	714	2.79	chr1:163080721-163080928	Olr201	LCP	-	Promoter	-9995	-10939	olfactory receptor Olr201	NP_001000190	Olfactory receptors interact with odorant molecules in the nose, to initiate a neuronal response that triggers the perception of a smell. The olfactory receptor proteins are members of a large family of G-protein-coupled receptors (GPCR) arising from single coding-exon genes. Olfactory receptors share a 7-transmembrane domain structure with many neurotransmitter and hormone receptors and are resp…	NM_001000190	163070829	163069885	944	207	15	111	14.5	53.6	163080721	163080928
IS	8756	chr1	95518649	95519268	619	2.79	chr1:95518817-95519175	Prrg2	ICP	-	Downstream	14415	7094	proline-rich Gla (G-carboxyglutamic acid)	NP_001101952		NM_001108482	95533411	95526090	7321	358	30	232	16.8	64.8	95518817	95519175
IS	9645	chr12	39293952	39294194	242	2.79	chr12:39294190-39294407				Unknown										217	18	129	16.6	59.4	39294190	39294407
IS	9662	chr12	46335829	46336538	709	2.79	chr12:46336045-46336294				Unknown										249	18	153	14.5	61.4	46336045	46336294
IS	10024	chr15	24368469	24368993	524	2.79	chr15:24368671-24368923	Peli2	LCP	+	Intragenic	141064	-2445	pellino 2	NP_001100729		NM_001107259	24227733	24371242	143509	252	22	166	17.5	65.9	24368671	24368923
IS	10321	chr18	147511	148510	999	2.79	chr18:147508-148682	F8	LCP	+	Intragenic	26962	-13913	coagulation factor VIII	NP_899160	human homolog is a cofactor for factor IXa; involved in blood coagulation [RGD].	NM_183331	121133	162008	40875	1174	87	662	14.8	56.4	147508	148682
IS	10829	chr20	19477836	19478459	623	2.79	chr20:19477978-19478185				Unknown										207	18	119	17.4	57.5	19477978	19478185
IS	11703	chr6	41569641	41570170	529	2.79	chr6:41569878-41570102	Hpcal1	HCP	+	Intragenic	111929	-6781	hippocalcin-like 1	NP_059052	plays a role in neuronal calcium sensing [RGD].	NM_017356	41458061	41576771	118710	224	18	133	16.1	59.4	41569878	41570102
IS	11869	chr7	67041867	67042772	905	2.79	chr7:67041677-67042741	Os9	ICP	-	Downstream	31146	4594	amplified in osteosarcoma	NP_001007266		NM_001007265	67073355	67046803	26552	1064	90	699	16.9	65.7	67041677	67042741
IS	8810	chr1	207396846	207397472	626	2.8	chr1:207396937-207397206				Unknown										269	23	155	17.1	57.6	207396937	207397206
IS	9538	chr11	85168578	85169107	529	2.8	chr11:85168551-85168918				Unknown										367	31	245	16.9	66.8	85168551	85168918
IS	9622	chr12	23257681	23258211	530	2.8	chr12:23257659-23258017	Clip2	HCP	+	Intragenic	29530	-34266	CAP-GLY domain containing linker protein 2	NP_068837	cytoplasmic linker protein; thought to mediate the interaction between membranous organelles and microtubules; human homolog associated with Williams Syndrome [RGD].	NM_021997	23228308	23292104	63796	358	25	234	14	65.4	23257659	23258017
IS	9824	chr13	71874202	71875277	1075	2.8	chr13:71873671-71874257	Tor3a	ICP	-	Promoter	70	-24362	torsin family 3, member A	NP_001009683		NM_001009683	71874034	71849602	24432	586	46	364	15.7	62.1	71873671	71874257
IS	10459	chr19	39603196	39603815	619	2.8	chr19:39603402-39603688				Unknown										286	23	172	16.1	60.1	39603402	39603688
IS	10462	chr19	41680527	41681052	525	2.8	chr19:41680517-41680851				Unknown										334	37	251	22.2	75.1	41680517	41680851
IS	12289	chr9	42760767	42761381	614	2.8	chr9:42760920-42761296	Nck2	HCP	+	Intragenic	110848	-15859	non-catalytic region of tyrosine kinase adaptor	NP_001101686		NM_001108216	42650260	42776967	126707	376	26	231	13.8	61.4	42760920	42761296
IS	8776	chr1	134549127	134549842	715	2.81	chr1:134549359-134549588	Det1	ICP	-	Downstream	16597	2764	de-etiolated homolog 1	NP_001032271		NM_001037194	134566070	134552237	13833	229	18	132	15.7	57.6	134549359	134549588
IS	9217	chr10	47389766	47390397	631	2.81	chr10:47390003-47390222				Unknown										219	28	164	25.6	74.9	47390003	47390222
IS	9629	chr12	29036203	29036815	612	2.81	chr12:29036387-29036699	Piwil1	ICP	-	Promoter	-52	-20885	piwi like homolog 1	NP_001102323		NM_001108853	29036491	29015658	20833	312	27	215	17.3	68.9	29036387	29036699
IS	10029	chr15	33176657	33176993	336	2.81	chr15:33176668-33176962				Unknown										294	20	184	13.6	62.6	33176668	33176962
IS	10150	chr16	73378929	73379548	619	2.81	chr16:73379044-73379320				Unknown										276	23	170	16.7	61.6	73379044	73379320
IS	10987	chr3	116889848	116890277	429	2.81	chr3:116889516-116890259				Unknown										743	78	458	21	61.6	116889516	116890259
IS	12097	chr8	20952209	20952448	239	2.81	chr8:20951933-20952230				Unknown										297	28	199	18.9	67	20951933	20952230
IS	8798	chr1	185924111	185924699	588	2.82	chr1:185924285-185924545				Unknown										260	25	149	19.2	57.3	185924285	185924545
IS	8745	chr1	87318558	87318994	436	2.82	chr1:87318753-87319061	Chst8	HCP	-	Promoter	-7371	-166418	carbohydrate (N-acetylgalactosamine 4-0)	NP_001100974		NM_001107504	87311536	87152489	159047	308	22	183	14.3	59.4	87318753	87319061
IS	8699	chr1	45590305	45591019	714	2.82	chr1:45590543-45590765	Pabpc3	ICP	+	Promoter	287	-2863	poly(A) binding protein, cytoplasmic 3	NP_001099678		NM_001106208	45590367	45593517	3150	222	20	136	18	61.3	45590543	45590765
IS	8731	chr1	80394514	80395133	619	2.82	chr1:80394416-80395122	Zfp574	HCP	+	Intragenic	4417	-829	zinc finger protein 574	NP_001019429		NM_001024258	80390352	80395598	5246	706	46	458	13	64.9	80394416	80395122
IS	9266	chr10	109725550	109726174	624	2.82	chr10:109725768-109726030				Unknown										262	26	160	19.8	61.1	109725768	109726030
IS	9340	chr10	45252409	45253433	1024	2.82	chr10:45253016-45253396	Hist3h2bb	HCP	-	Degenerate_Promoter	-7524	-8272	histone cluster 3, H2bb	NP_001103111		NM_001109641	45245682	45244934	748	380	37	235	19.5	61.8	45253016	45253396
IS	9340	chr10	45252409	45253433	1024	2.82	chr10:45253016-45253396	LOC691496	ICP	+	Degenerate_Promoter	214	-197	hypothetical protein LOC691496	NP_001103112		NM_001109642	45252992	45253403	411	380	37	235	19.5	61.8	45253016	45253396
IS	10148	chr16	70765951	70766381	430	2.82	chr16:70765861-70766105				Unknown										244	17	145	13.9	59.4	70765861	70766105
IS	10745	chr2	203752097	203753098	1001	2.82	chr2:203751686-203752180	Amigo1	ICP	+	Promoter	-698	-2179	adhesion molecule with Ig like domain 1	NP_996764		NM_206881	203752631	203754112	1481	494	59	325	23.9	65.8	203751686	203752180
IS	10811	chr20	10316763	10317482	719	2.82	chr20:10316956-10317268				Unknown										312	25	181	16	58	10316956	10317268
IS	10839	chr20	44787339	44787578	239	2.82	chr20:44787522-44787800	Ddo	ICP	+	Intragenic	20750	-1322	D-aspartate oxidase	NP_001102935		NM_001109465	44766911	44788983	22072	278	20	161	14.4	57.9	44787522	44787800
IS	10786	chr20	16439	17174	735	2.82	chr20:16620-16942	Tmlhe	HCP	+	Intragenic	8159	-39343	trimethyllysine hydroxylase, epsilon	NP_596878	first enzyme in the carnitine biosynthesis pathway; plays an important role in the transport of fatty acids across the inner mitochondrial membrane [RGD].	NM_133387	8622	56124	47502	322	29	217	18	67.4	16620	16942
IS	11018	chr3	160754613	160755223	610	2.82	chr3:160754844-160755063				Unknown										219	15	125	13.7	57.1	160754844	160755063
IS	11026	chr3	164685548	164686162	614	2.82	chr3:164685635-164685955				Unknown										320	25	213	15.6	66.6	164685635	164685955
IS	11023	chr3	164017342	164017875	533	2.82	chr3:164017405-164017787	Pck1	LCP	+	Intragenic	5187	-762	phosphoenolpyruvate carboxykinase 1	NP_942075		NM_198780	164012409	164018358	5949	382	26	219	13.6	57.3	164017405	164017787
IS	12273	chr9	8528666	8529190	524	2.82	chr9:8528904-8529109	Foxp4	HCP	+	Intragenic	19979	-50591	forkhead box P4	NP_001102258		NM_001108788	8509027	8579597	70570	205	22	144	21.5	70.2	8528904	8529109
IS	12472	chrUn_random	5353780	5354494	714	2.82	chrUn_random:5354006-5354236				Unknown										230	20	131	17.4	57	5354006	5354236
IS	9204	chr10	21066531	21067064	533	2.83	chr10:21066757-21067002				Unknown										245	19	140	15.5	57.1	21066757	21067002
IS	11239	chr4	58718032	58718556	524	2.83	chr4:58718081-58718302				Unknown										221	16	121	14.5	54.8	58718081	58718302
IS	11248	chr4	76709687	76710301	614	2.83	chr4:76709705-76710352	RGD1559747	ICP	+	Promoter	-7071	-13993	hypothetical protein LOC312310	NP_001101330		NM_001107860	76717099	76724021	6922	647	48	416	14.8	64.3	76709705	76710352
IS	11843	chr7	10910495	10911104	609	2.83	chr7:10910380-10910735	RGD1359127	HCP	+	Downstream	8964	6837	hypothetical protein LOC299612	NP_001007658		NM_001007657	10901593	10903720	2127	355	27	239	15.2	67.3	10910380	10910735
IS	11843	chr7	10910495	10911104	609	2.83	chr7:10911056-10911371	RGD1359127	HCP	+	Downstream	9620	7493	hypothetical protein LOC299612	NP_001007658		NM_001007657	10901593	10903720	2127	315	23	205	14.6	65.1	10911056	10911371
IS	9200	chr10	19590473	19591100	627	2.84	chr10:19590577-19590867				Unknown										290	23	152	15.9	52.4	19590577	19590867
IS	9903	chr14	7962824	7963148	324	2.84	chr14:7962490-7963127	Mapk10	ICP	+	Intragenic	243214	-47886	mitogen activated protein kinase 10	NP_036938	a stress-activated protein kinase [RGD].	NM_012806	7719594	8010694	291100	637	52	368	16.3	57.8	7962490	7963127
IS	10145	chr16	59780643	59781261	618	2.84	chr16:59780737-59781049				Unknown										312	25	200	16	64.1	59780737	59781049
IS	10488	chr19	57213530	57214149	619	2.84	chr19:57213666-57213897	Pard3	HCP	+	Intragenic	198040	-389352	partitioning-defective protein 3 homolog	NP_112514	may mediate the establishment and maintenance of epithelial cell polarity [RGD].	NM_031235	57015741	57603133	587392	231	17	129	14.7	55.8	57213666	57213897
IS	11443	chr5	25529518	25530235	717	2.84	chr5:25529665-25530051				Unknown										386	30	251	15.5	65	25529665	25530051
IS	11512	chr5	169659162	169659881	719	2.84	chr5:169659316-169659697				Unknown										381	27	240	14.2	63	169659316	169659697
IS	9531	chr11	79097631	79098342	711	2.85	chr11:79097822-79098123	Rtp2	LCP	+	Intragenic	5395	-294	receptor transporter protein 2	NP_001100553		NM_001107083	79092577	79098266	5689	301	25	194	16.6	64.5	79097822	79098123
IS	10259	chr17	86201127	86201658	531	2.85	chr17:86201372-86201580				Unknown										208	16	122	15.4	58.7	86201372	86201580
IS	10346	chr18	29723070	29723695	625	2.85	chr18:29722971-29723626	Pcdha11	ICP	+	Promoter	-5304	-204732	protocadherin alpha 11	NP_955780		NM_199486	29728602	29928030	199428	655	54	401	16.5	61.2	29722971	29723626
IS	10480	chr19	53679485	53680105	620	2.85	chr19:53679674-53679982	Spire2	HCP	+	Intragenic	21208	-17457	spire homolog 2	NP_001121010		NM_001127538	53658620	53697285	38665	308	21	202	13.6	65.6	53679674	53679982
IS	10630	chr2	251505313	251505832	519	2.85	chr2:251505429-251505779				Unknown										350	28	194	16	55.4	251505429	251505779
IS	10617	chr2	200709365	200709625	260	2.85	chr2:200708874-200710148	Kcnd3	HCP	+	Promoter	-266	-215053	potassium voltage gated channel, Shal-related	NP_113927	voltage-gated K+ channel that generates an A type K+ current [RGD]. Publication Note: This RefSeq record includes a subset of the publications that are available for this gene. Please see the Entrez Gene record to access additional publications.	NM_031739	200709777	200924564	214787	1274	129	857	20.3	67.3	200708874	200710148
IS	10816	chr20	12463376	12463990	614	2.85	chr20:12463501-12463937	Ftcd	LCP	-	Downstream	20088	6570	formiminotransferase cyclodeaminase	NP_446019	binds vimentin intermediate filaments; may regulate cytoskeletal rearrangement [RGD].	NM_053567	12483807	12470289	13518	436	36	274	16.5	62.8	12463501	12463937
IS	11857	chr7	22722419	22723128	709	2.85	chr7:22722540-22722962				Unknown										422	36	259	17.1	61.4	22722540	22722962
IS	12307	chr9	105496599	105497128	529	2.85	chr9:105496747-105497144				Unknown										397	31	250	15.6	63	105496747	105497144
IS	9210	chr10	35094975	35095504	529	2.86	chr10:35094990-35095277	Flt4	HCP	+	Intragenic	24132	-16872	FMS-like tyrosine kinase 4	NP_446104	VEGF receptor-related, cell surface associated kinase with growth promoting ability [RGD].	NM_053652	35071001	35112005	41004	287	24	181	16.7	63.1	35094990	35095277
IS	9713	chr12	22473499	22474308	809	2.86	chr12:22473879-22474228	Fkbp6	HCP	+	Degenerate_Promoter	52	-70731	FK506 binding protein 6	NP_001099392		NM_001105922	22474001	22544784	70783	349	34	232	19.5	66.5	22473879	22474228
IS	9713	chr12	22473499	22474308	809	2.86	chr12:22473879-22474228	Trim50	LCP	-	Degenerate_Promoter	-3530	-18504	tripartite motif-containing 50	NP_851594		NM_181080	22470523	22455549	14974	349	34	232	19.5	66.5	22473879	22474228
IS	10016	chr15	5714344	5714983	639	2.86	chr15:5714307-5714891	Cd99l2	ICP	+	Intragenic	40936	-4559	Cd99 antigen-like 2	NP_604454	enriched in respiration-related neurons; may play a role in detection of chemicals in cerebrospinal fluid [RGD].	NM_134459	5673663	5719158	45495	584	50	382	17.1	65.4	5714307	5714891
IS	11459	chr5	129481418	129481847	429	2.86	chr5:129481527-129482001				Unknown										474	51	333	21.5	70.3	129481527	129482001
IS	11436	chr5	1116319	1117037	718	2.86	chr5:1116385-1116944	Jph1	HCP	+	Intragenic	6376	-90428	junctophilin 1	NP_001100100		NM_001106630	1110288	1207092	96804	559	38	329	13.6	58.9	1116385	1116944
IS	11841	chr7	10841948	10843233	1285	2.86	chr7:10841943-10843492				Unknown										1549	114	1038	14.7	67	10841943	10843492
IS	11833	chr7	10010392	10010931	539	2.86	chr7:10010449-10011018	Eef2	HCP	-	Downstream	11598	6327	eukaryotic translation elongation factor 2	NP_058941	catalyzes the translocation of peptidyl-tRNA from the ribosomal A site to the P site in translational elongation [RGD]. Publication Note: This RefSeq record includes a subset of the publications that are available for this gene. Please see the Entrez Gene record to access additional publications.	NM_017245	10022331	10017060	5271	569	46	341	16.2	59.9	10010449	10011018
IS	11825	chr7	1531560	1531791	231	2.86	chr7:1531283-1531537	Timeless	HCP	+	Intragenic	14841	-9094	timeless homolog	NP_112630	human homolog is a circadian clock gene [RGD].	NM_031340	1516569	1540504	23935	254	19	156	15	61.4	1531283	1531537
IS	12430	chrUn	2940740	2941024	284	2.86	chrUn:2940789-2941175				Unknown										386	27	247	14	64	2940789	2941175
IS	10147	chr16	68975043	68975682	639	2.87	chr16:68975291-68975494				Unknown										203	16	115	15.8	56.7	68975291	68975494
IS	10368	chr18	81218127	81218839	712	2.87	chr18:81218338-81218596				Unknown										258	20	153	15.5	59.3	81218338	81218596
IS	11929	chr7	140479856	140480475	619	2.87	chr7:140480077-140480333	Krt72	LCP	-	Promoter	203	-9967	keratin 72	NP_001008809		NM_001008809	140480408	140470238	10170	256	23	184	18	71.9	140480077	140480333
IS	12429	chrUn	2287394	2287658	264	2.87	chrUn:2287446-2287789				Unknown										343	33	229	19.2	66.8	2287446	2287789
IS	8726	chr1	79069202	79069821	619	2.88	chr1:79069406-79069698	Pvrl2	HCP	-	Promoter	-9866	-47721	poliovirus receptor related 2	NP_001012064		NM_001012064	79059686	79021831	37855	292	21	174	14.4	59.6	79069406	79069698
IS	8819	chr1	213341205	213341819	614	2.88	chr1:213341379-213341713	Slc15a3	ICP	+	Promoter	225	-14556	solute carrier family 15, member 3	NP_647557	may play a role in protein catabolism in the lymphatic system [RGD].	NM_139341	213341321	213356102	14781	334	26	213	15.6	63.8	213341379	213341713
IS	8705	chr1	67572631	67573354	723	2.88	chr1:67572844-67573115	Zfp524	LCP	-	Promoter	-8476	-9525	zinc finger protein 524	NP_001102375		NM_001108905	67564503	67563454	1049	271	22	184	16.2	67.9	67572844	67573115
IS	9649	chr12	42323954	42324573	619	2.88	chr12:42324088-42324505	Arbp	HCP	-	Promoter	-5564	-8531	acidic ribosomal phosphoprotein P0	NP_071797	member of the ribosomal protein family; has similarity to other P ribosomal proteins over the carboxyl terminal sequence [RGD].	NM_022402	42318732	42315765	2967	417	31	248	14.9	59.5	42324088	42324505
IS	10955	chr3	3750231	3750463	232	2.88	chr3:3748608-3751495	Phpt1	ICP	-	Promoter	-3705	-5105	phosphohistidine phosphatase 1	NP_001100028		NM_001106558	3746346	3744946	1400	2887	267	1894	18.5	65.6	3748608	3751495
IS	11479	chr5	155523815	155524529	714	2.88	chr5:155523974-155524356				Unknown										382	36	255	18.8	66.8	155523974	155524356
IS	12088	chr8	4943551	4944178	627	2.88	chr8:4943654-4943949				Unknown										295	20	169	13.6	57.3	4943654	4943949
IS	12449	chrUn	52896836	52897150	314	2.88	chrUn:52896854-52897432				Unknown										578	41	372	14.2	64.4	52896854	52897432
IS	12455	chrUn	74986178	74986707	529	2.88	chrUn:74986238-74986619				Unknown										381	31	232	16.3	60.9	74986238	74986619
IS	8800	chr1	186712626	186713152	526	2.89	chr1:186712697-186713242				Unknown										545	39	343	14.3	62.9	186712697	186713242
IS	9098	chr1	204900722	204901252	530	2.89	chr1:204900619-204901302	Cttn	HCP	-	Promoter	261	-35192	cortactin isoform B	NP_068640	component of clathrin-coated pits; involved in receptor-mediated endocytosis [RGD].	NM_021868	204901221	204865768	35453	683	50	460	14.6	67.3	204900619	204901302
IS	9776	chr13	81721775	81722089	314	2.89	chr13:81721485-81722065				Unknown										580	55	325	19	56	81721485	81722065
IS	10477	chr19	50904198	50904816	618	2.89	chr19:50904310-50904575				Unknown										265	18	171	13.6	64.5	50904310	50904575
IS	11258	chr4	122271562	122272656	1094	2.89	chr4:122271275-122272685	Gata2	ICP	+	Promoter	-7772	-16548	GATA binding protein 2	NP_254277	mediates phagocytosis function of alveolar macrophages [RGD].	NM_033442	122279752	122288528	8776	1410	113	852	16	60.4	122271275	122272685
IS	11449	chr5	60445849	60446557	708	2.89	chr5:60446058-60446323	Ccin	LCP	+	Promoter	507	-1379	calicin	NP_001005904		NM_001005904	60445683	60447569	1886	265	18	143	13.6	54	60446058	60446323
IS	11489	chr5	159859584	159860298	714	2.89	chr5:159859730-159860138	Mfap2	ICP	+	Promoter	-8998	-14547	microfibrillar-associated protein 2	NP_001101459		NM_001107989	159868932	159874481	5549	408	30	270	14.7	66.2	159859730	159860138
IS	12115	chr8	94844170	94844814	644	2.89	chr8:94844406-94844613				Unknown										207	14	112	13.5	54.1	94844406	94844613
IS	12482	chrX	69902482	69902835	353	2.89	chrX:69902456-69906031				Unknown										3575	240	2116	13.4	59.2	69902456	69906031
IS	10253	chr17	49622762	49623086	324	2.9	chr17:49622834-49623069				Unknown										235	30	167	25.5	71.1	49622834	49623069
IS	11245	chr4	76184757	76185180	423	2.9	chr4:76184892-76185303				Unknown										411	30	249	14.6	60.6	76184892	76185303
IS	12104	chr8	45324750	45325469	719	2.9	chr8:45324985-45325202				Unknown										217	21	143	19.4	65.9	45324985	45325202
IS	12275	chr9	9803495	9803742	247	2.9	chr9:9803232-9803503	Srf	HCP	+	Downstream	14990	5728	serum response factor	NP_001102772		NM_001109302	9788377	9797639	9262	271	24	177	17.7	65.3	9803232	9803503
IS	8695	chr1	30292242	30292951	709	2.91	chr1:30292450-30292720				Unknown										270	21	174	15.6	64.4	30292450	30292720
IS	10485	chr19	54849962	54850310	348	2.91	chr19:54849739-54850269				Unknown										530	35	348	13.2	65.7	54849739	54850269
IS	11862	chr7	28326850	28327564	714	2.91	chr7:28327077-28327317				Unknown										240	24	125	20	52.1	28327077	28327317
IS	9211	chr10	37339221	37339465	244	2.92	chr10:37338992-37339195				Unknown										203	16	137	15.8	67.5	37338992	37339195
IS	10350	chr18	30286698	30287062	364	2.92	chr18:30286942-30287149				Unknown										207	15	125	14.5	60.4	30286942	30287149
IS	10577	chr2	23946618	23947265	647	2.92	chr2:23946741-23946992	Bhmt	ICP	-	Promoter	-3546	-23214	betaine-homocysteine methyltransferase	NP_110477	displays differential expression in a model of liver cirrhosis [RGD]. Publication Note: This RefSeq record includes a subset of the publications that are available for this gene. Please see the Entrez Gene record to access additional publications.	NM_030850	23943320	23923652	19668	251	25	158	19.9	62.9	23946741	23946992
IS	10994	chr3	142326369	142327083	714	2.92	chr3:142326266-142327268				Unknown										1002	65	632	13	63.1	142326266	142327268
IS	11497	chr5	166006555	166007280	725	2.92	chr5:166006790-166007007				Unknown										217	21	149	19.4	68.7	166006790	166007007
IS	11705	chr6	47899363	47899882	519	2.92	chr6:47899397-47899630				Unknown										233	16	144	13.7	61.8	47899397	47899630
IS	12094	chr8	20061470	20062084	614	2.92	chr8:20061683-20061942	Icam1	ICP	+	Downstream	21636	9874	intercellular adhesion molecule 1	NP_037099	cell adhesion molecule; ligand for leukocyte adhesion molecule LFA-1 [RGD]. Publication Note: This RefSeq record includes a subset of the publications that are available for this gene. Please see the Entrez Gene record to access additional publications.	NM_012967	20040176	20051938	11762	259	24	179	18.5	69.1	20061683	20061942
IS	10798	chr20	5636436	5637155	719	2.93	chr20:5636446-5637123				Unknown										677	54	429	16	63.4	5636446	5637123
IS	11269	chr4	174395151	174395860	709	2.93	chr4:174395362-174395563	Ptpro	ICP	+	Intragenic	19067	-191232	protein tyrosine phosphatase, receptor type, O	NP_059032	may regulate glomerular epithelial cell function; may play a role in neural cell development [RGD].	NM_017336	174376395	174586694	210299	201	15	110	14.9	54.7	174395362	174395563
IS	12072	chr7	140479911	140480435	524	2.93	chr7:140480077-140480333	Krt72	LCP	-	Promoter	203	-9967	keratin 72	NP_001008809		NM_001008809	140480408	140470238	10170	256	23	184	18	71.9	140480077	140480333
IS	8827	chr1	253426255	253426872	617	2.94	chr1:253426368-253426643				Unknown										275	20	172	14.5	62.5	253426368	253426643
IS	10153	chr16	80900696	80900930	234	2.94	chr16:80900117-80900969	Gas6	HCP	+	Promoter	385	-30386	growth arrest specific 6	NP_476441	provides protection of neurons against serum deprivation-induced apoptosis [RGD]. Publication Note: This RefSeq record includes a subset of the publications that are available for this gene. Please see the Entrez Gene record to access additional publications.	NM_057100	80900158	80930929	30771	852	74	575	17.4	67.5	80900117	80900969
IS	10448	chr19	25215631	25216350	719	2.94	chr19:25215868-25216090				Unknown										222	15	125	13.5	56.3	25215868	25216090
IS	11907	chr7	132832865	132833386	521	2.94	chr7:132833006-132833219				Unknown										213	16	110	15	51.6	132833006	132833219
IS	8715	chr1	72954574	72955313	739	2.95	chr1:72954711-72955117				Unknown										406	29	254	14.3	62.6	72954711	72955117
IS	9777	chr13	87460236	87460635	399	2.95	chr13:87460149-87460471	Itln1	LCP	+	Downstream	15192	5088	intelectin 1 (galactofuranose binding)	NP_001030118		NM_001034946	87445118	87455222	10104	322	27	191	16.8	59.3	87460149	87460471
IS	9893	chr14	2471248	2471642	394	2.95	chr14:2471189-2471433	RGD69425	ICP	-	Promoter	-65	-1537	ubiquitin-conjugating enzyme	NP_112263	ubiquitin-conjugating enzyme (E2 class); mediates the targeting of abnormal and short-lived proteins for degradation [RGD].	NM_031001	2471246	2469774	1472	244	22	163	18	66.8	2471189	2471433
IS	11485	chr5	158463693	158464307	614	2.95	chr5:158463735-158464332				Unknown										597	45	355	15.1	59.5	158463735	158464332
IS	11550	chr5	60445523	60446152	629	2.95	chr5:60446058-60446323	Ccin	LCP	+	Promoter	507	-1379	calicin	NP_001005904		NM_001005904	60445683	60447569	1886	265	18	143	13.6	54	60446058	60446323
IS	10823	chr20	14240169	14240880	711	2.96	chr20:14240397-14240630				Unknown										233	19	149	16.3	63.9	14240397	14240630
IS	11481	chr5	156813209	156813874	665	2.96	chr5:156813438-156813642	Eif4g3	ICP	+	Intragenic	3923	-165709	eukaryotic translation initiation factor 4	NP_001100163		NM_001106693	156809617	156979249	169632	204	22	148	21.6	72.5	156813438	156813642
IS	11860	chr7	26938089	26938614	525	2.96	chr7:26938124-26938364				Unknown										240	21	127	17.5	52.9	26938124	26938364
IS	11834	chr7	10042867	10043606	739	2.96	chr7:10042771-10043558	Zbtb7a	HCP	-	Downstream	17292	4444	zinc finger and BTB domain containing 7a	NP_446454	acts as a transcriptional repressor; may play a role in osteoclastogenesis [RGD].	NM_054002	10060456	10047608	12848	787	64	488	16.3	62	10042771	10043558
IS	9183	chr10	11518542	11519066	524	2.97	chr10:11518607-11519176				Unknown										569	39	337	13.7	59.2	11518607	11519176
IS	9601	chr12	2617035	2617559	524	2.97	chr12:2616992-2617397				Unknown										405	30	267	14.8	65.9	2616992	2617397
IS	9632	chr12	32931132	32931371	239	2.97	chr12:32931359-32931587	Ccdc92	HCP	+	Downstream	33280	6874	coiled-coil domain containing 92	NP_001077367		NM_001083898	32898193	32924599	26406	228	16	130	14	57	32931359	32931587
IS	9621	chr12	22473704	22474332	628	2.97	chr12:22473879-22474228	Fkbp6	HCP	+	Degenerate_Promoter	52	-70731	FK506 binding protein 6	NP_001099392		NM_001105922	22474001	22544784	70783	349	34	232	19.5	66.5	22473879	22474228
IS	9626	chr12	27735796	27736265	469	2.97	chr12:27735983-27736238	Gusb	ICP	+	Promoter	-8298	-21645	glucuronidase, beta	NP_058711	catalyzes the conversion of a beta-D-glucuronoside and H2O to an alcohol and D-glucuronate [RGD].	NM_017015	27744408	27757755	13347	255	18	144	14.1	56.5	27735983	27736238
IS	9621	chr12	22473704	22474332	628	2.97	chr12:22473879-22474228	Trim50	LCP	-	Degenerate_Promoter	-3530	-18504	tripartite motif-containing 50	NP_851594		NM_181080	22470523	22455549	14974	349	34	232	19.5	66.5	22473879	22474228
IS	9892	chr14	2431206	2431925	719	2.97	chr14:2431374-2431720				Unknown										346	25	184	14.5	53.2	2431374	2431720
IS	11004	chr3	153763548	153764266	718	2.97	chr3:153763686-153764042				Unknown										356	30	206	16.9	57.9	153763686	153764042
IS	12123	chr8	112106121	112106825	704	2.97	chr8:112106358-112106564	Armet	HCP	-	Downstream	6850	4896	arginine-rich, mutated in early stage tumors	NP_001101653		NM_001108183	112113311	112111357	1954	206	15	136	14.6	66	112106358	112106564
IS	12431	chrUn	4874795	4875205	410	2.97	chrUn:4874787-4875456				Unknown										669	68	471	20.3	70.4	4874787	4875456
IS	8691	chr1	22395130	22395378	248	2.98	chr1:22395349-22395608				Unknown										259	20	131	15.4	50.6	22395349	22395608
IS	8771	chr1	128177689	128178131	442	2.98	chr1:128177535-128178033				Unknown										498	33	293	13.3	58.8	128177535	128178033
IS	9920	chr14	65871804	65872416	612	2.98	chr14:65872029-65872263				Unknown										234	17	128	14.5	54.7	65872029	65872263
IS	10973	chr3	39103498	39104123	625	2.98	chr3:39103648-39103851	Gpd2	HCP	+	Intragenic	123116	-10739	glycerol-3-phosphate dehydrogenase 2	NP_036868	FAD-linked glycerol-3-phosphate dehydrogenase; expression in liver is induced by thyroid hormone [RGD].	NM_012736	38980633	39114488	133855	203	18	110	17.7	54.2	39103648	39103851
IS	11912	chr7	134393166	134393782	616	2.98	chr7:134393293-134393541				Unknown										248	18	135	14.5	54.4	134393293	134393541
IS	8716	chr1	76314822	76315351	529	2.99	chr1:76314860-76315094	Ehd2	ICP	-	Promoter	-4393	-22798	EH-domain containing 2	NP_001020068		NM_001024897	76310584	76292179	18405	234	18	156	15.4	66.7	76314860	76315094
IS	9131	chr1	213340784	213341592	808	2.99	chr1:213341379-213341713	Slc15a3	ICP	+	Promoter	225	-14556	solute carrier family 15, member 3	NP_647557	may play a role in protein catabolism in the lymphatic system [RGD].	NM_139341	213341321	213356102	14781	334	26	213	15.6	63.8	213341379	213341713
IS	10621	chr2	205131743	205132462	719	2.99	chr2:205131908-205132267				Unknown										359	27	190	15	52.9	205131908	205132267
IS	11252	chr4	88359038	88359764	726	2.99	chr4:88359201-88359563				Unknown										362	34	245	18.8	67.7	88359201	88359563
IS	12096	chr8	20260235	20260959	724	2.99	chr8:20260464-20260706				Unknown										242	20	142	16.5	58.7	20260464	20260706
IS	10246	chr17	21412856	21413563	707	3	chr17:21413092-21413304				Unknown										212	18	135	17	63.7	21413092	21413304
IS	10348	chr18	29736146	29736470	324	3	chr18:29735751-29736440	Pcdha12	ICP	+	Intragenic	1583	-191935	protocadherin alpha 12	NP_446392	member of the cadherin superfamily of cell adhesion molecules; may play a role in spermatogenesis [RGD].	NM_053940	29734512	29928030	193518	689	54	423	15.7	61.4	29735751	29736440
IS	11910	chr7	133037487	133038006	519	3	chr7:133037584-133037993				Unknown										409	31	235	15.2	57.5	133037584	133037993
IS	11830	chr7	9876241	9876670	429	3	chr7:9876052-9876541	Tbxa2r	LCP	-	Promoter	-3760	-8558	thromboxane A2 receptor	NP_058750	binds thromboxane and induces an increase in cytosolic Ca2+ levels; may play a role renal electrolyte metabolism; may mediate vascular smooth muscle cell contraction and proliferation [RGD]. Publication Note: This RefSeq record includes a subset of the publications that are available for this gene. Please see the Entrez Gene record to access additional publications.	NM_017054	9872536	9867738	4798	489	37	283	15.1	57.9	9876052	9876541
IS	12258	chr8	124895295	124896420	1125	3	chr8:124895047-124895385	Gorasp1	ICP	-	Promoter	-90	-11767	golgi reassembly stacking protein 1	NP_062258	plays a role in stacking Golgi cisternae during the disassembly and reassembly of the Golgi apparatus in mitosis [RGD].	NM_019385	124895126	124883449	11677	338	31	239	18.3	70.7	124895047	124895385
IS	8817	chr1	210105842	210106461	619	3.01	chr1:210105739-210107171	RGD1560108	LCP	+	Intragenic	1791	-3086	hypothetical protein LOC499309	NP_001102631		NM_001109161	210104664	210109541	4877	1432	116	942	16.2	65.8	210105739	210107171
IS	8749	chr1	92441955	92442475	520	3.01	chr1:92442189-92442413	Vstm2b	LCP	+	Intragenic	3707	-24231	V-set and transmembrane domain containing 2B	NP_001101949		NM_001108479	92438594	92466532	27938	224	23	137	20.5	61.2	92442189	92442413
IS	10003	chr14	87949888	87950700	812	3.01	chr14:87950515-87950739	Igfbp1	ICP	+	Promoter	406	-4661	insulin-like growth factor binding protein 1	NP_037276	a modulator of a Insulin growth factor (IGF) bioavailability [RGD]. Publication Note: This RefSeq record includes a subset of the publications that are available for this gene. Please see the Entrez Gene record to access additional publications.	NM_013144	87950221	87955288	5067	224	17	154	15.2	68.8	87950515	87950739
IS	10345	chr18	29716308	29717022	714	3.01	chr18:29716513-29716791	Pcdha10	ICP	+	Promoter	-4950	-211378	protocadherin alpha 10	NP_446391	may play a role in cell-cell adhesion during spermatogenesis [RGD].	NM_053939	29721602	29928030	206428	278	21	166	15.1	59.7	29716513	29716791
IS	10814	chr20	12336885	12337599	714	3.01	chr20:12337083-12337387				Unknown										304	22	176	14.5	57.9	12337083	12337387
IS	10822	chr20	14173523	14174142	619	3.01	chr20:14173573-14174156	Gnaz	ICP	-	Promoter	272	-25862	guanine nucleotide binding protein, alpha z	NP_037321	member of a family of G-protein alpha subunits; may have pertussis toxin-insensitive activity [RGD].	NM_013189	14174136	14148002	26134	583	46	366	15.8	62.8	14173573	14174156
IS	11228	chr4	4660103	4660772	669	3.01	chr4:4660314-4660573				Unknown										259	27	179	20.8	69.1	4660314	4660573
IS	11506	chr5	168230641	168231165	524	3.01	chr5:168230828-168231134				Unknown										306	22	187	14.4	61.1	168230828	168231134
IS	8869	chr1	45590205	45590832	627	3.02	chr1:45590543-45590765	Pabpc3	ICP	+	Promoter	287	-2863	poly(A) binding protein, cytoplasmic 3	NP_001099678		NM_001106208	45590367	45593517	3150	222	20	136	18	61.3	45590543	45590765
IS	9618	chr12	16819229	16819968	739	3.02	chr12:16819402-16819747	Asmt	LCP	-	Degenerate_Promoter	-2388	-7683	acetylserotonin O-methyltransferase	NP_653360	methyltransferase enzyme; catalyzes the methylation of acetylserotonin to complete the synthesis of melatonin [RGD].	NM_144759	16817186	16811891	5295	345	28	204	16.2	59.1	16819402	16819747
IS	9618	chr12	16819229	16819968	739	3.02	chr12:16819402-16819747	Asmtl	LCP	+	Degenerate_Promoter	-5290	-6127	acetylserotonin O-methyltransferase-like	NP_001099385		NM_001105915	16824864	16825701	837	345	28	204	16.2	59.1	16819402	16819747
IS	9636	chr12	34134448	34134992	544	3.02	chr12:34134539-34134837	Clip1	HCP	+	Intragenic	84916	-20838	restin	NP_113933	linker protein that associates with growing ends of microtubules [RGD].	NM_031745	34049772	34155526	105754	298	35	213	23.5	71.5	34134539	34134837
IS	9767	chr13	45250330	45251053	723	3.02	chr13:45250551-45250807				Unknown										256	19	161	14.8	62.9	45250551	45250807
IS	10026	chr15	32385670	32386403	733	3.02	chr15:32385844-32386180				Unknown										336	27	180	16.1	53.6	32385844	32386180
IS	10139	chr16	32080040	32080765	725	3.02	chr16:32080273-32080489				Unknown										216	16	117	14.8	54.2	32080273	32080489
IS	11927	chr7	139792505	139793235	730	3.02	chr7:139792744-139792961	Scn8a	ICP	+	Intragenic	106673	-1438	sodium channel, voltage-gated, type 8, alpha	NP_062139	tetrodotoxin-sensitive sodium channel alpha subunit [RGD].	NM_019266	139686179	139794290	108111	217	17	118	15.7	54.4	139792744	139792961
IS	12106	chr8	48642436	48643170	734	3.02	chr8:48642649-48642922	Dscaml1	ICP	+	Intragenic	236413	-80990	Down syndrome cell adhesion molecule-like 1	NP_001101611		NM_001108141	48406372	48723775	317403	273	20	175	14.7	64.1	48642649	48642922
IS	12278	chr9	11470817	11471526	709	3.02	chr9:11471058-11471262				Unknown										204	15	119	14.7	58.3	11471058	11471262
IS	12487	chrX	91600057	91600481	424	3.02	chrX:91600286-91600514				Unknown										228	25	153	21.9	67.1	91600286	91600514
IS	9248	chr10	96170015	96170449	434	3.03	chr10:96169966-96170190	Ccdc45	HCP	+	Degenerate_Downstream	30755	1194	coiled-coil domain containing 45	NP_001013884		NM_001013862	96139323	96168884	29561	224	17	142	15.2	63.4	96169966	96170190
IS	9248	chr10	96170015	96170449	434	3.03	chr10:96169966-96170190	Smurf2	LCP	-	Degenerate_Downstream	99287	511	SMAD specific E3 ubiquitin protein ligase 2	NP_001100531		NM_001107061	96269365	96170589	98776	224	17	142	15.2	63.4	96169966	96170190
IS	10236	chr17	12525758	12526463	705	3.03	chr17:12525961-12526237				Unknown										276	22	170	15.9	61.6	12525961	12526237
IS	11894	chr7	121815768	121816488	720	3.03	chr7:121815988-121816243	Mpped1	ICP	+	Promoter	104	-67566	metallophosphoesterase domain containing 1	NP_001124041		NM_001130569	121816011	121883681	67670	255	18	169	14.1	66.3	121815988	121816243
IS	12136	chr8	124448536	124449865	1329	3.03	chr8:124448531-124449865				Unknown										1334	88	802	13.2	60.1	124448531	124449865
IS	12141	chr8	126459687	126460205	518	3.03	chr8:126459712-126459964				Unknown										252	18	156	14.3	61.9	126459712	126459964
IS	12294	chr9	74706321	74707035	714	3.03	chr9:74706566-74706775	Gmppa	ICP	+	Promoter	-6933	-14360	GDP-mannose pyrophosphorylase A	NP_001020227		NM_001025056	74713603	74721030	7427	209	19	125	18.2	59.8	74706566	74706775
IS	12428	chrUn	448581	448965	384	3.03	chrUn:448593-448806	LOC310926	HCP	+	Downstream	20475	8844	hypothetical protein LOC310926	NP_001020173		NM_001025002	428224	439855	11631	213	28	142	26.3	66.7	448593	448806
IS	9184	chr10	11820983	11821482	499	3.04	chr10:11820997-11821288				Unknown										291	27	203	18.6	69.8	11820997	11821288
IS	9244	chr10	95352875	95353593	718	3.04	chr10:95353096-95353341	Ace	HCP	+	Promoter	-8119	-28237	angiotensin I-converting enzyme	NP_036676	catalyzes the conversion of angiotensin I to angiotensin II; plays a role in regulation of blood pressure [RGD]. Publication Note: This RefSeq record includes a subset of the publications that are available for this gene. Please see the Entrez Gene record to access additional publications.	NM_012544	95361337	95381455	20118	245	19	152	15.5	62	95353096	95353341
IS	9226	chr10	67433608	67433957	349	3.04	chr10:67433676-67434062	Gosr1	ICP	+	Intragenic	26667	-8732	golgi SNAP receptor complex member 1	NP_446036	component of the Golgi SNAP receptor (SNARE) complex involved with ER-Golgi transport [RGD].	NM_053584	67407202	67442601	35399	386	30	220	15.5	57	67433676	67434062
IS	9515	chr11	11371429	11372143	714	3.04	chr11:11371625-11371919	Robo1	LCP	+	Intragenic	586826	-348873	roundabout homolog 1	NP_071524	putative axon guidance receptor [RGD].	NM_022188	10784946	11720645	935699	294	21	152	14.3	51.7	11371625	11371919
IS	10468	chr19	47549969	47550683	714	3.04	chr19:47550149-47550482				Unknown										333	26	221	15.6	66.4	47550149	47550482
IS	11261	chr4	134698235	134698707	472	3.04	chr4:134698220-134698564				Unknown										344	23	200	13.4	58.1	134698220	134698564
IS	11501	chr5	166704029	166704743	714	3.04	chr5:166704251-166704498				Unknown										247	21	143	17	57.9	166704251	166704498
IS	11696	chr6	21050804	21051419	615	3.04	chr6:21050999-21051229	Spast	HCP	-	Promoter	-2422	-61032	spastin	NP_001102172		NM_001108702	21048692	20990082	58610	230	17	128	14.8	55.7	21050999	21051229
IS	8747	chr1	90034653	90035181	528	3.05	chr1:90034742-90035064				Unknown										322	23	199	14.3	61.8	90034742	90035064
IS	8764	chr1	96400189	96400905	716	3.05	chr1:96400384-96400677	Emp3	LCP	-	Promoter	-7570	-10748	epithelial membrane protein 3	NP_110474	may control dome formation in mammary cells [RGD].	NM_030847	96392960	96389782	3178	293	22	181	15	61.8	96400384	96400677
IS	9606	chr12	6306412	6307026	614	3.05	chr12:6306559-6306765				Unknown										206	18	117	17.5	56.8	6306559	6306765
IS	9666	chr12	46774898	46775572	674	3.05	chr12:46775008-46775432				Unknown										424	35	254	16.5	59.9	46775008	46775432
IS	10361	chr18	71365895	71366129	234	3.05	chr18:71365585-71365943				Unknown										358	26	205	14.5	57.3	71365585	71365943
IS	10442	chr19	15816271	15816515	244	3.05	chr19:15816014-15816229				Unknown										215	18	131	16.7	60.9	15816014	15816229
IS	10804	chr20	6539601	6540309	708	3.05	chr20:6539775-6540070	Ppard	HCP	+	Intragenic	60826	-3100	peroxisome proliferator-activated receptor	NP_037273	transcription factor of the nuclear hormone receptor superfamily; may mediate the intestinal expression of target genes implicated in lipid metabolism [RGD]. Publication Note: This RefSeq record includes a subset of the publications that are available for this gene. Please see the Entrez Gene record to access additional publications.	NM_013141	6479096	6543022	63926	295	26	184	17.6	62.4	6539775	6540070
IS	11438	chr5	5244214	5244933	719	3.05	chr5:5244446-5244662	Ncoa2	LCP	+	Intragenic	46664	-28446	nuclear receptor coactivator 2	NP_114010	binds to nuclear receptor complex leading to coactivation [RGD].	NM_031822	5197890	5273000	75110	216	16	115	14.8	53.2	5244446	5244662
IS	12109	chr8	60335869	60336385	516	3.05	chr8:60335941-60336476				Unknown										535	35	333	13.1	62.2	60335941	60336476
IS	9262	chr10	106338783	106339397	614	3.06	chr10:106338796-106339241				Unknown										445	31	284	13.9	63.8	106338796	106339241
IS	9533	chr11	82457800	82458499	699	3.06	chr11:82457967-82458234				Unknown										267	21	164	15.7	61.4	82457967	82458234
IS	10240	chr17	14947276	14947773	497	3.06	chr17:14947313-14947527				Unknown										214	19	144	17.8	67.3	14947313	14947527
IS	11827	chr7	9677239	9677767	528	3.06	chr7:9677264-9677521	Gna15	LCP	+	Intragenic	7437	-12050	guanine nucleotide binding protein, alpha 15	NP_445994	alpha subunit of an heterotrimeric G-protein; may function in taste signal transduction [RGD]. Sequence Note: This sequence has been modified as follows: removed 75 bp suspected to be vector contamination from the 5' end.	NM_053542	9669955	9689442	19487	257	20	158	15.6	61.5	9677264	9677521
IS	12282	chr9	35015491	35016205	714	3.06	chr9:35015642-35016037	Hs6st1	HCP	+	Intragenic	37399	-2450	heparan sulfate 6-O-sulfotransferase 1	NP_001101680		NM_001108210	34978440	35018289	39849	395	32	243	16.2	61.5	35015642	35016037
IS	8684	chr1	3399276	3399990	714	3.07	chr1:3399509-3399741				Unknown										232	21	137	18.1	59.1	3399509	3399741
IS	9517	chr11	32623574	32624298	724	3.07	chr11:32623670-32624177				Unknown										507	49	350	19.3	69	32623670	32624177
IS	10256	chr17	77932408	77933122	714	3.07	chr17:77932630-77932879				Unknown										249	18	152	14.5	61	77932630	77932879
IS	10844	chr20	47919344	47919955	611	3.07	chr20:47919556-47919812				Unknown										256	20	141	15.6	55.1	47919556	47919812
IS	8725	chr1	79003736	79004354	618	3.08	chr1:79003851-79004319	Apoc1	LCP	-	Promoter	-4125	-7409	apolipoprotein C-I precursor	NP_001103466	may play a role in lipid transport [RGD].	NM_001109996	78999960	78996676	3284	468	43	315	18.4	67.3	79003851	79004319
IS	9188	chr10	12999314	12999750	436	3.08	chr10:12999259-12999494	Paqr4	HCP	-	Promoter	-2081	-5694	progestin and adipoQ receptor family member IV	NP_001017377		NM_001017377	12997295	12993682	3613	235	27	160	23	68.1	12999259	12999494
IS	9535	chr11	84589976	84590684	708	3.08	chr11:84590133-84590504	Comt	HCP	+	Downstream	28728	8606	catechol-O-methyltransferase	NP_036663	catalyzes the conversion of S-adenosyl-L-methionine and catechol to S-adenosyl-L-homocysteine and guaiacol [RGD]. Publication Note: This RefSeq record includes a subset of the publications that are available for this gene. Please see the Entrez Gene record to access additional publications.	NM_012531	84561590	84581712	20122	371	34	256	18.3	69	84590133	84590504
IS	10244	chr17	19372758	19373467	709	3.08	chr17:19372988-19373215				Unknown										227	19	137	16.7	60.4	19372988	19373215
IS	11714	chr6	115267035	115267770	735	3.08	chr6:115267246-115267520				Unknown										274	21	161	15.3	58.8	115267246	115267520
IS	11865	chr7	32370872	32371486	614	3.08	chr7:32370943-32371295				Unknown										352	27	191	15.3	54.3	32370943	32371295
IS	12276	chr9	10022857	10023389	532	3.08	chr9:10022909-10023121	Klc4	ICP	-	Promoter	-7283	-20816	kinesin light chain 4	NP_001009601		NM_001009601	10015732	10002199	13533	212	22	132	20.8	62.3	10022909	10023121
IS	9735	chr12	35116750	35118454	1704	3.09	chr12:35116844-35117058	P2rx7	ICP	-	Promoter	201	-42926	purinergic receptor P2X, ligand-gated ion	NP_062129	an ATP receptor; may be involved in fast synaptic transmission and the ATP-mediated lysis of antigen-presenting cells [RGD]. Publication Note: This RefSeq record includes a subset of the publications that are available for this gene. Please see the Entrez Gene record to access additional publications.	NM_019256	35117152	35074025	43127	214	16	124	15	57.9	35116844	35117058
IS	10805	chr20	7090891	7091605	714	3.09	chr20:7090915-7091552	Brpf3	ICP	+	Promoter	357	-30331	bromodomain and PHD finger containing, 3	NP_001101085		NM_001107615	7090876	7121564	30688	637	44	382	13.8	60	7090915	7091552
IS	10794	chr20	5325650	5326181	531	3.09	chr20:5325598-5326018	Itpr3	HCP	+	Intragenic	33379	-31692	inositol 1,4,5-triphosphate receptor 3	NP_037270	receptor for Inositol 1,4,5-trisphosphate (IP3); involved in second messenger signaling [RGD]. Publication Note: This RefSeq record includes a subset of the publications that are available for this gene. Please see the Entrez Gene record to access additional publications.	NM_013138	5292429	5357500	65071	420	31	269	14.8	64	5325598	5326018
IS	10982	chr3	77249283	77249857	574	3.09	chr3:77249424-77249743				Unknown										319	24	196	15	61.4	77249424	77249743
IS	11913	chr7	134543019	134543741	722	3.09	chr7:134543249-134543475	Tmem16f	HCP	+	Intragenic	108588	-80764	transmembrane protein 16F	NP_001101578		NM_001108108	134434774	134624126	189352	226	19	119	16.8	52.7	134543249	134543475
IS	12143	chr8	127448297	127448822	525	3.09	chr8:127448293-127448614				Unknown										321	30	232	18.7	72.3	127448293	127448614
IS	12423	chr9	108511721	108513049	1328	3.09	chr9:108513103-108513338	Zfp161	ICP	+	Promoter	411	-937	zinc finger protein 161	NP_758828	mouse homolog has growth inhibiting activity and may act as a transcriptional repressor of c-myc [RGD].	NM_172325	108512809	108514157	1348	235	17	126	14.5	53.6	108513103	108513338
IS	12485	chrX	88427912	88428441	529	3.09	chrX:88427875-88428260				Unknown										385	27	214	14	55.6	88427875	88428260
IS	9625	chr12	27698478	27698996	518	3.1	chr12:27698703-27698938	Asl	ICP	+	Promoter	-4061	-21410	argininosuccinate lyase	NP_067588		NM_021577	27702881	27720230	17349	235	16	120	13.6	51.1	27698703	27698938
IS	9916	chr14	34911378	34912127	749	3.1	chr14:34911614-34911839				Unknown										225	17	114	15.1	50.7	34911614	34911839
IS	9927	chr14	87950283	87950807	524	3.1	chr14:87950515-87950739	Igfbp1	ICP	+	Promoter	406	-4661	insulin-like growth factor binding protein 1	NP_037276	a modulator of a Insulin growth factor (IGF) bioavailability [RGD]. Publication Note: This RefSeq record includes a subset of the publications that are available for this gene. Please see the Entrez Gene record to access additional publications.	NM_013144	87950221	87955288	5067	224	17	154	15.2	68.8	87950515	87950739
IS	10136	chr16	20299747	20300370	623	3.1	chr16:20299776-20300215				Unknown										439	37	310	16.9	70.6	20299776	20300215
IS	10158	chr16	86124871	86125590	719	3.1	chr16:86125063-86125372				Unknown										309	25	185	16.2	59.9	86125063	86125372
IS	10790	chr20	4128524	4129239	715	3.11	chr20:4128724-4129007	C4a	LCP	+	Intragenic	22701	-187011	complement component 4a	NP_113692	complement protein, part of the classical activation pathway; localizes to the class III region of the MHC [RGD].	NM_031504	4106164	4315876	209712	283	23	175	16.3	61.8	4128724	4129007
IS	10241	chr17	17048311	17049027	716	3.12	chr17:17048552-17048768				Unknown										216	17	130	15.7	60.2	17048552	17048768
IS	10438	chr19	10123648	10124272	624	3.12	chr19:10123770-10124221				Unknown										451	34	294	15.1	65.2	10123770	10124221
IS	11011	chr3	159249133	159249992	859	3.12	chr3:159248889-159249505	Pard6b	HCP	+	Intragenic	18525	-2558	par-6 (partitioning defective 6) homolog beta	NP_001102079		NM_001108609	159230672	159251755	21083	616	45	367	14.6	59.6	159248889	159249505
IS	11011	chr3	159249133	159249992	859	3.12	chr3:159249607-159249820	Pard6b	HCP	+	Intragenic	19041	-2042	par-6 (partitioning defective 6) homolog beta	NP_001102079		NM_001108609	159230672	159251755	21083	213	15	131	14.1	61.5	159249607	159249820
IS	11839	chr7	10592895	10593139	244	3.12	chr7:10593118-10593367				Unknown										249	20	153	16.1	61.4	10593118	10593367
IS	11866	chr7	36575729	36576348	619	3.12	chr7:36575969-36576182	Atp2b1	HCP	+	Intragenic	82415	-24205	plasma membrane calcium ATPase 1	NP_445763	regulates intracellular Ca2+ levels [RGD].	NM_053311	36493660	36600280	106620	213	17	128	16	60.1	36575969	36576182
IS	8823	chr1	245899142	245899850	708	3.13	chr1:245899341-245899564				Unknown										223	17	149	15.2	66.8	245899341	245899564
IS	8730	chr1	80319366	80320075	709	3.13	chr1:80319600-80319816	Atp1a3	ICP	-	Promoter	-9874	-38995	Na+/K+ -ATPase alpha 3 subunit	NP_036638	contains 4.5 kb and 6 kb transcripts that display differential tissue expression [RGD].	NM_012506	80309834	80280713	29121	216	17	130	15.7	60.2	80319600	80319816
IS	10948	chr20_random	488761	489380	619	3.13	chr20_random:488870-489158	Wasf1	HCP	+	Intragenic	56348	-830	WASP family 1	NP_001020285		NM_001025114	432666	489844	57178	288	28	166	19.4	57.6	488870	489158
IS	9783	chr13	103083044	103084198	1154	3.14	chr13:103083712-103083954	RGD1309586	HCP	+	Intragenic	676	-2494	hypothetical protein LOC364073	NP_001102328		NM_001108858	103083157	103086327	3170	242	19	140	15.7	57.9	103083712	103083954
IS	9783	chr13	103083044	103084198	1154	3.14	chr13:103083131-103083461	RGD1309586	HCP	+	Promoter	139	-3031	hypothetical protein LOC364073	NP_001102328		NM_001108858	103083157	103086327	3170	330	31	201	18.8	60.9	103083131	103083461
IS	10443	chr19	20599230	20599944	714	3.14	chr19:20599394-20599745	Zfp423	ICP	+	Intragenic	160561	-139667	zinc finger protein 423	NP_446035	zinc finger protein that interacts with the Olf-1/EBF transcription factor; plays a role in regulation of differentiation of olfactory neurons [RGD].	NM_053583	20439008	20739236	300228	351	26	212	14.8	60.4	20599394	20599745
IS	10815	chr20	12456521	12457136	615	3.14	chr20:12456569-12456968				Unknown										399	31	232	15.5	58.1	12456569	12456968
IS	10900	chr20	7090751	7091370	619	3.14	chr20:7090915-7091552	Brpf3	ICP	+	Promoter	357	-30331	bromodomain and PHD finger containing, 3	NP_001101085		NM_001107615	7090876	7121564	30688	637	44	382	13.8	60	7090915	7091552
IS	11447	chr5	51729040	51729564	524	3.14	chr5:51729208-51729459				Unknown										251	17	148	13.5	59	51729208	51729459
IS	11867	chr7	58610228	58610773	545	3.14	chr7:58610313-58610583				Unknown										270	22	161	16.3	59.6	58610313	58610583
IS	8732	chr1	80547420	80548134	714	3.15	chr1:80547505-80548020				Unknown										515	35	329	13.6	63.9	80547505	80548020
IS	9896	chr14	6988814	6989523	709	3.15	chr14:6989039-6989276	Klhl8	HCP	+	Intragenic	31034	-14473	kelch-like 8	NP_001099465		NM_001105995	6958123	7003630	45507	237	19	135	16	57	6989039	6989276
IS	10819	chr20	13816850	13817464	614	3.15	chr20:13816861-13817335				Unknown										474	32	284	13.5	59.9	13816861	13817335
IS	8727	chr1	79819385	79819914	529	3.16	chr1:79819382-79820496	RGD1565787	LCP	-	Downstream	12952	7598	hypothetical protein LOC308429	NP_001100958		NM_001107488	79832891	79827537	5354	1114	95	773	17.1	69.4	79819382	79820496
IS	10865	chr20	2991206	2992234	1028	3.16	chr20:2992307-2992540	Ppp1r10	HCP	-	Degenerate_Promoter	-8026	-21744	protein phosphatase 1, regulatory subunit 10	NP_075240	functions as nuclear targeting subunit and potent modulator of phosphatase 1 (PP1), a key mediator nuclear processes [RGD].	NM_022951	2984397	2970679	13718	233	25	154	21.5	66.1	2992307	2992540
IS	10865	chr20	2991206	2992234	1028	3.16	chr20:2992307-2992540	RGD1303066	ICP	+	Degenerate_Promoter	19	-12933	hypothetical protein LOC361789	NP_997663		NM_212498	2992404	3005356	12952	233	25	154	21.5	66.1	2992307	2992540
IS	10981	chr3	76876674	76877414	740	3.16	chr3:76876900-76877144				Unknown										244	17	133	13.9	54.5	76876900	76877144
IS	12197	chr8	66423067	66424371	1304	3.16	chr8:66422877-66423173	Spesp1	ICP	-	Promoter	59	-14437	sperm equatorial segment protein 1	NP_001071150		NM_001077682	66423084	66408588	14496	296	29	196	19.6	66.2	66422877	66423173
IS	11692	chr6	9675667	9676404	737	3.17	chr6:9675888-9676134	Prkce	HCP	+	Intragenic	44770	-421300	protein kinase C, epsilon	NP_058867	has phospholipid and diacylglycerol-dependent activity; plays a role in ouabain induced Na+/K+-ATPase mediated signal transduction in cardiac myocytes [RGD]. Publication Note: This RefSeq record includes a subset of the publications that are available for this gene. Please see the Entrez Gene record to access additional publications.	NM_017171	9631241	10097311	466070	246	17	137	13.8	55.7	9675888	9676134
IS	9664	chr12	46723480	46724245	765	3.18	chr12:46721957-46728297				Unknown										6340	470	3912	14.8	61.7	46721957	46728297
IS	12016	chr7	116807033	116808262	1229	3.18	chr7:116807984-116808190	Cdc42ep1	LCP	+	Promoter	326	-3276	CDC42 effector protein (Rho GTPase binding) 1	NP_001073168		NM_001079700	116807761	116811363	3602	206	21	139	20.4	67.5	116807984	116808190
IS	9638	chr12	34631461	34632086	625	3.19	chr12:34631471-34632147				Unknown										676	52	420	15.4	62.1	34631471	34632147
IS	11855	chr7	18655672	18656321	649	3.19	chr7:18655473-18656274				Unknown										801	53	505	13.2	63	18655473	18656274
IS	12475	chrX	13266383	13266717	334	3.19	chrX:13265907-13267202				Unknown										1295	122	882	18.8	68.1	13265907	13267202
IS	8735	chr1	83571446	83572257	811	3.2	chr1:83571440-83572341	Lrfn1	LCP	+	Promoter	611	-8753	leucine rich repeat and fibronectin type III	NP_001121166		NM_001127694	83571279	83580643	9364	901	57	558	12.7	61.9	83571440	83572341
IS	8753	chr1	94876902	94877618	716	3.2	chr1:94877103-94877388	Syt3	LCP	+	Intragenic	10439	-3212	synaptotagmin III	NP_061995	member of the synaptotagmin family; brain specific calcium/phospholipid-binding protein; essential for calcium-dependent synaptic vesicle exocytosis; may be the calcium sensor for fast calcium-triggered neurotransmitter release [RGD].	NM_019122	94866806	94880457	13651	285	22	173	15.4	60.7	94877103	94877388
IS	9216	chr10	46401394	46402114	720	3.2	chr10:46400726-46401532				Unknown										806	83	505	20.6	62.7	46400726	46401532
IS	9205	chr10	21159588	21160015	427	3.2	chr10:21159494-21159794				Unknown										300	20	179	13.3	59.7	21159494	21159794
IS	9216	chr10	46401394	46402114	720	3.2	chr10:46401718-46401923				Unknown										205	17	126	16.6	61.5	46401718	46401923
IS	10013	chr14_random	270772	271391	619	3.2	chr14_random:270899-271143				Unknown										244	20	150	16.4	61.5	270899	271143
IS	11473	chr5	152315447	152316156	709	3.2	chr5:152315667-152315873	Ppp1r8	HCP	+	Intragenic	9835	-7305	protein phosphatase 1, regulatory (inhibitor)	NP_001101381		NM_001107911	152305935	152323075	17140	206	18	124	17.5	60.2	152315667	152315873
IS	11495	chr5	162293651	162294265	614	3.2	chr5:162293574-162294158	Pramel1	LCP	+	Promoter	-2671	-6320	preferentially expressed antigen in	NP_001103087		NM_001109617	162296537	162300186	3649	584	40	333	13.7	57	162293574	162294158
IS	11709	chr6	95338763	95339378	615	3.2	chr6:95339006-95339212				Unknown										206	18	136	17.5	66	95339006	95339212
IS	11838	chr7	10588705	10589514	809	3.2	chr7:10588701-10590032				Unknown										1331	93	858	14	64.5	10588701	10590032
IS	9243	chr10	94569840	94570394	554	3.21	chr10:94569640-94570427				Unknown										787	59	490	15	62.3	94569640	94570427
IS	9232	chr10	87544300	87544919	619	3.21	chr10:87544393-87544691	Thra	LCP	+	Downstream	18283	2238	c-erbA-alpha2 isoform TRalpha2	NP_112396	binds the promoter of the Na+/H+ exchanger NHE1 and mediates thyroid hormone induced transcriptional activation [RGD].	NM_031134	87526259	87542304	16045	298	22	173	14.8	58.1	87544393	87544691
IS	9611	chr12	11613731	11614260	529	3.21	chr12:11613872-11614089	Zdhhc4	LCP	+	Downstream	19050	8208	zinc finger, DHHC domain containing 4	NP_001013141		NM_001013123	11594930	11605772	10842	217	15	136	13.8	62.7	11613872	11614089
IS	11864	chr7	31410154	31410873	719	3.22	chr7:31410377-31410629				Unknown										252	18	149	14.3	59.1	31410377	31410629
IS	12299	chr9	86292607	86293321	714	3.22	chr9:86292725-86293133				Unknown										408	32	259	15.7	63.5	86292725	86293133
IS	8729	chr1	80161440	80162152	712	3.23	chr1:80161639-80161920	Dmrtc2	ICP	+	Degenerate_Promoter	2	-7177	doublesex and mab-3 related transcription factor	NP_001102610		NM_001109140	80161777	80168956	7179	281	22	171	15.7	60.9	80161639	80161920
IS	8729	chr1	80161440	80162152	712	3.23	chr1:80161639-80161920	Lypd4	ICP	-	Degenerate_Promoter	-300	-5850	Ly6/Plaur domain containing 4	NP_001103765		NM_001110295	80161479	80155929	5550	281	22	171	15.7	60.9	80161639	80161920
IS	9620	chr12	21884809	21885532	723	3.23	chr12:21884845-21885459	Ywhag	HCP	+	Intragenic	25349	-2898	tyrosine 3-monooxygenase/tryptophan	NP_062249	belongs to the 14-3-3 family of proteins; mediates signal transduction via activation of protein kinase C and calcium/calmodulin-dependent protein kinase II [RGD].	NM_019376	21859803	21888050	28247	614	45	367	14.7	59.8	21884845	21885459
IS	11266	chr4	172723103	172723812	709	3.23	chr4:172723229-172723662				Unknown										433	32	246	14.8	56.8	172723229	172723662
IS	9194	chr10	14638664	14639303	639	3.24	chr10:14638896-14639129				Unknown										233	19	149	16.3	63.9	14638896	14639129
IS	10598	chr2	142756253	142756874	621	3.24	chr2:142756393-142756619				Unknown										226	16	139	14.2	61.5	142756393	142756619
IS	10831	chr20	20073477	20074126	649	3.24	chr20:20073711-20073935				Unknown										224	16	116	14.3	51.8	20073711	20073935
IS	10943	chr20	46577830	46578776	946	3.24	chr20:46578260-46578574	Ostm1	ICP	+	Promoter	65	-4352	osteopetrosis associated transmembrane protein	NP_001025096		NM_001029925	46578352	46582769	4417	314	23	180	14.6	57.3	46578260	46578574
IS	11003	chr3	149436631	149437129	498	3.24	chr3:149436641-149436844				Unknown										203	19	130	18.7	64	149436641	149436844
IS	11007	chr3	156209952	156210677	725	3.24	chr3:156210165-156210438				Unknown										273	21	165	15.4	60.4	156210165	156210438
IS	11900	chr7	127462364	127462980	616	3.24	chr7:127462546-127462861				Unknown										315	22	201	14	63.8	127462546	127462861
IS	11906	chr7	131740241	131740874	633	3.24	chr7:131740417-131740763				Unknown										346	33	221	19.1	63.9	131740417	131740763
IS	11876	chr7	113878097	113878526	429	3.24	chr7:113878305-113878586	Naprt1	LCP	-	Degenerate_Promoter	-9715	-13158	nicotinate phosphoribosyltransferase domain	NP_997492	may act as a nicotinate phosphoribosyltransferase in NAD salvage synthesis [RGD].	NM_207609	113868730	113865287	3443	281	24	187	17.1	66.5	113878305	113878586
IS	11850	chr7	11480926	11481445	519	3.24	chr7:11480919-11481633	Polrmt	ICP	+	Intragenic	6812	-3404	polymerase (RNA) mitochondrial (DNA directed)	NP_001100236		NM_001106766	11474464	11484680	10216	714	58	460	16.2	64.4	11480919	11481633
IS	11876	chr7	113878097	113878526	429	3.24	chr7:113878305-113878586	Tigd5	HCP	+	Degenerate_Promoter	-7313	-9833	tigger transposable element derived 5	NP_001119740		NM_001126268	113885758	113888278	2520	281	24	187	17.1	66.5	113878305	113878586
IS	12306	chr9	104769182	104769931	749	3.24	chr9:104769176-104769930				Unknown										754	67	469	17.8	62.2	104769176	104769930
IS	8703	chr1	67563582	67564296	714	3.25	chr1:67563824-67564040	Fiz1	ICP	+	Degenerate_Promoter	-3922	-10437	Flt3 interacting zinc finger protein 1	NP_001099693		NM_001106223	67567854	67574369	6515	216	18	133	16.7	61.6	67563824	67564040
IS	8703	chr1	67563582	67564296	714	3.25	chr1:67563824-67564040	Zfp524	LCP	-	Degenerate_Promoter	571	-478	zinc finger protein 524	NP_001102375		NM_001108905	67564503	67563454	1049	216	18	133	16.7	61.6	67563824	67564040
IS	11014	chr3	159981797	159982513	716	3.25	chr3:159982017-159982271				Unknown										254	18	156	14.2	61.4	159982017	159982271
IS	11690	chr6	7157679	7158294	615	3.26	chr6:7157820-7158027				Unknown										207	19	127	18.4	61.4	7157820	7158027
IS	11837	chr7	10322362	10323711	1349	3.26	chr7:10322525-10322884	Timm13	HCP	+	Downstream	2746	1643	translocase of inner mitochondrial membrane 13	NP_665724	small zinc finger protein involved in mitochondrial carrier import [RGD].	NM_145781	10319958	10321061	1103	359	31	238	17.3	66.3	10322525	10322884
IS	11837	chr7	10322362	10323711	1349	3.26	chr7:10323277-10323508	Timm13	HCP	+	Downstream	3434	2331	translocase of inner mitochondrial membrane 13	NP_665724	small zinc finger protein involved in mitochondrial carrier import [RGD].	NM_145781	10319958	10321061	1103	231	17	156	14.7	67.5	10323277	10323508
IS	10961	chr3	4657655	4658274	619	3.27	chr3:4657821-4658032				Unknown										211	15	141	14.2	66.8	4657821	4658032
IS	10977	chr3	59557748	59558462	714	3.27	chr3:59557961-59558217				Unknown										256	18	138	14.1	53.9	59557961	59558217
IS	11861	chr7	26954815	26955555	740	3.27	chr7:26955043-26955276				Unknown										233	20	143	17.2	61.4	26955043	26955276
IS	11638	chr5	155035730	155036344	614	3.28	chr5:155036466-155036696	Zfp46	LCP	+	Intragenic	706	-3795	zinc finger protein 46	NP_001100161		NM_001106691	155035875	155040376	4501	230	19	142	16.5	61.7	155036466	155036696
IS	9231	chr10	85779883	85780597	714	3.29	chr10:85779955-85780507	Osbpl7	LCP	+	Intragenic	8291	-9259	oxysterol binding protein-like 7	NP_001100514		NM_001107044	85771940	85789490	17550	552	36	350	13	63.4	85779955	85780507
IS	10466	chr19	44881423	44882063	640	3.29	chr19:44881577-44881779				Unknown										202	17	102	16.8	50.5	44881577	44881779
IS	10626	chr2	240273316	240273850	534	3.29	chr2:240273271-240273673				Unknown										402	31	230	15.4	57.2	240273271	240273673
IS	10840	chr20	45368993	45369734	741	3.29	chr20:45369190-45369491				Unknown										301	21	154	14	51.2	45369190	45369491
IS	10999	chr3	145882513	145883249	736	3.29	chr3:145882709-145882998				Unknown										289	29	199	20.1	68.9	145882709	145882998
IS	12286	chr9	37153085	37153807	722	3.29	chr9:37153256-37153560				Unknown										304	27	216	17.8	71.1	37153256	37153560
IS	12311	chr9	110481673	110482287	614	3.29	chr9:110481712-110482068				Unknown										356	27	200	15.2	56.2	110481712	110482068
IS	9218	chr10	47450374	47450923	549	3.3	chr10:47450616-47450826				Unknown										210	15	113	14.3	53.8	47450616	47450826
IS	10836	chr20	28660125	28660844	719	3.3	chr20:28660371-28660577	Prf1	LCP	+	Intragenic	2108	-3396	perforin 1 (pore forming protein)	NP_059026	cytolytic factor present in cytoplasmic granules [RGD].	NM_017330	28658366	28663870	5504	206	18	126	17.5	61.2	28660371	28660577
IS	11518	chr5	172879872	172880578	706	3.3	chr5:172880089-172880336	LOC500598	LCP	+	Downstream	11017	8419	similar to tumor necrosis factor receptor	NP_001019520		NM_001024349	172869195	172871793	2598	247	22	144	17.8	58.3	172880089	172880336
IS	12077	chr7	140627581	140628296	715	3.3	chr7:140627760-140628122	Krt4	ICP	-	Promoter	138	-5309	keratin 4	NP_001008806		NM_001008806	140628079	140622632	5447	362	27	231	14.9	63.8	140627760	140628122
IS	11930	chr7	140627601	140628311	710	3.3	chr7:140627760-140628122	Krt4	ICP	-	Promoter	138	-5309	keratin 4	NP_001008806		NM_001008806	140628079	140622632	5447	362	27	231	14.9	63.8	140627760	140628122
IS	12314	chr9	5897983	5899151	1168	3.3	chr9:5898917-5899802	Dazl	HCP	+	Promoter	256	-16476	deleted in azoospermia-like	NP_001102884		NM_001109414	5899103	5915835	16732	885	76	607	17.2	68.6	5898917	5899802
IS	9951	chr14	13632549	13633092	543	3.31	chr14:13632998-13633457	LOC289482	ICP	+	Promoter	173	-9863	ARD1 homolog B	NP_001019913		NM_001024742	13633054	13643090	10036	459	38	297	16.6	64.7	13632998	13633457
IS	10472	chr19	49278628	49279162	534	3.31	chr19:49278669-49278886	Cdh13	ICP	+	Intragenic	771605	-296343	cadherin 13	NP_620244	cell adhesion molecule; involved in cell growth regulation [RGD].	NM_138889	48507172	49575120	1067948	217	16	112	14.7	51.6	49278669	49278886
IS	11017	chr3	160557992	160558616	624	3.31	chr3:160558084-160558406				Unknown										322	23	175	14.3	54.3	160558084	160558406
IS	11500	chr5	166549844	166550556	712	3.31	chr5:166550032-166550342				Unknown										310	21	182	13.5	58.7	166550032	166550342
IS	10458	chr19	38776156	38777060	904	3.32	chr19:38776055-38777097				Unknown										1042	74	619	14.2	59.4	38776055	38777097
IS	11000	chr3	146117420	146118134	714	3.32	chr3:146117641-146117885	Myh7b	LCP	+	Intragenic	1956	-22492	myosin, heavy chain 7B, cardiac muscle, beta	NP_001101264		NM_001107794	146115807	146140255	24448	244	19	152	15.6	62.3	146117641	146117885
IS	11842	chr7	10896966	10897671	705	3.32	chr7:10897025-10897588	Reep6	HCP	-	Degenerate_Promoter	-5370	-12040	receptor accessory protein 6	NP_001013236		NM_001013218	10891936	10885266	6670	563	39	369	13.9	65.5	10897025	10897588
IS	11842	chr7	10896966	10897671	705	3.32	chr7:10897025-10897588	RGD1359127	HCP	+	Degenerate_Promoter	-4287	-6414	hypothetical protein LOC299612	NP_001007658		NM_001007657	10901593	10903720	2127	563	39	369	13.9	65.5	10897025	10897588
IS	9700	chr12	16829815	16830719	904	3.33	chr12:16829643-16829847	Il3ra	LCP	-	Promoter	290	-4043	interleukin 3 receptor, alpha chain	NP_640353	a putative cytokine receptor expressed in testis,lung and spleen [RGD].	NM_139260	16830035	16825702	4333	204	22	136	21.6	66.7	16829643	16829847
IS	10033	chr15	38743982	38744506	524	3.33	chr15:38744194-38744450				Unknown										256	20	163	15.6	63.7	38744194	38744450
IS	10155	chr16	81951898	81952638	740	3.33	chr16:81952122-81952354				Unknown										232	21	145	18.1	62.5	81952122	81952354
IS	10333	chr18	5015655	5016819	1164	3.33	chr18:5015893-5016115				Unknown										222	17	130	15.3	58.6	5015893	5016115
IS	10333	chr18	5015655	5016819	1164	3.33	chr18:5016419-5016643				Unknown										224	17	134	15.2	59.8	5016419	5016643
IS	10928	chr20	14173643	14174828	1185	3.33	chr20:14173573-14174156	Gnaz	ICP	-	Promoter	272	-25862	guanine nucleotide binding protein, alpha z	NP_037321	member of a family of G-protein alpha subunits; may have pertussis toxin-insensitive activity [RGD].	NM_013189	14174136	14148002	26134	583	46	366	15.8	62.8	14173573	14174156
IS	9537	chr11	84839855	84840569	714	3.34	chr11:84840082-84840309				Unknown										227	16	139	14.1	61.2	84840082	84840309
IS	9658	chr12	44624773	44625297	524	3.34	chr12:44624979-44625251				Unknown										272	26	166	19.1	61	44624979	44625251
IS	11274	chr4	184707543	184708158	615	3.34	chr4:184707740-184707988	Klhdc5	HCP	+	Intragenic	18939	-1995	kelch domain containing 5	NP_001102727		NM_001109257	184688925	184709859	20934	248	18	144	14.5	58.1	184707740	184707988
IS	11484	chr5	158406005	158406729	724	3.34	chr5:158406248-158406461				Unknown										213	17	130	16	61	158406248	158406461
IS	8775	chr1	130021630	130022349	719	3.35	chr1:130021758-130022196				Unknown										438	32	266	14.6	60.7	130021758	130022196
IS	10608	chr2	181250014	181250639	625	3.35	chr2:181250234-181250489	Clk2	LCP	+	Intragenic	818	-7002	CDC-like kinase 2	NP_001014276		NM_001014254	181249543	181257363	7820	255	19	171	14.9	67.1	181250234	181250489
IS	10845	chr20	49053588	49054327	739	3.35	chr20:49053794-49054064	Prep	HCP	+	Intragenic	29013	-90741	prolyl endopeptidase	NP_112614	may play a role in neuropeptide catabolism; expressed in brain; most enzyme activity is localized to the cytosolic fraction [RGD].	NM_031324	49024916	49144670	119754	270	20	151	14.8	55.9	49053794	49054064
IS	11259	chr4	122553430	122554085	655	3.35	chr4:122553640-122553912	Ruvbl1	HCP	+	Promoter	-3080	-37992	RuvB-like protein 1	NP_671706	nuclear DNA helicase that binds TBP; involved in recombination and transcription [RGD].	NM_147177	122556856	122591768	34912	272	23	165	16.9	60.7	122553640	122553912
IS	11454	chr5	74986284	74986999	715	3.35	chr5:74986448-74986799				Unknown										351	29	219	16.5	62.4	74986448	74986799
IS	11688	chr6	1396907	1397519	612	3.35	chr6:1397002-1397246				Unknown										244	18	137	14.8	56.1	1397002	1397246
IS	9180	chr10	1842766	1843518	752	3.36	chr10:1842964-1843259				Unknown										295	21	185	14.2	62.7	1842964	1843259
IS	11494	chr5	161043278	161043812	534	3.36	chr5:161043310-161043685				Unknown										375	30	226	16	60.3	161043310	161043685
IS	11750	chr6	25413688	25414607	919	3.36	chr6:25414703-25414974	Abhd1	ICP	-	Degenerate_Promoter	-4357	-9346	abhydrolase domain containing 1	NP_001008520		NM_001008520	25410481	25405492	4989	271	35	211	25.8	77.9	25414703	25414974
IS	11750	chr6	25413688	25414607	919	3.36	chr6:25414703-25414974	Cgref1	ICP	+	Degenerate_Promoter	-51	-11979	cell growth regulator with EF hand domain 1	NP_620787	inhibits cell growth [RGD].	NM_139087	25414889	25426817	11928	271	35	211	25.8	77.9	25414703	25414974
IS	12442	chrUn	25175142	25175756	614	3.36	chrUn:25175254-25175523				Unknown										269	25	178	18.6	66.2	25175254	25175523
IS	11896	chr7	123962309	123963018	709	3.37	chr7:123962544-123962761				Unknown										217	18	139	16.6	64.1	123962544	123962761
IS	8787	chr1	158382344	158383059	715	3.38	chr1:158382494-158382880	Arhgef17	ICP	-	Promoter	-6950	-65820	Rho guanine nucleotide exchange factor (GEF) 17	NP_001101008		NM_001107538	158375737	158316867	58870	386	27	245	14	63.5	158382494	158382880
IS	8821	chr1	230835384	230836278	894	3.38	chr1:230835374-230836254	Kcnv2	LCP	+	Promoter	932	-13471	potassium channel, subfamily V, member 2	NP_001099840		NM_001106370	230834882	230849285	14403	880	60	555	13.6	63.1	230835374	230836254
IS	10360	chr18	61932198	61932912	714	3.38	chr18:61932422-61932662	Znf532	LCP	+	Intragenic	63562	-44460	zinc finger protein 532	NP_001100852		NM_001107382	61868980	61977002	108022	240	20	143	16.7	59.6	61932422	61932662
IS	11273	chr4	181435555	181436222	667	3.38	chr4:181435774-181436022				Unknown										248	19	142	15.3	57.3	181435774	181436022
IS	9663	chr12	46446398	46447103	705	3.39	chr12:46446542-46446935				Unknown										393	33	230	16.8	58.5	46446542	46446935
IS	10612	chr2	190045153	190045784	631	3.4	chr2:190045380-190045605	Scnm1	ICP	-	Promoter	-6465	-10396	sodium channel modifier 1	NP_001101166		NM_001107696	190039027	190035096	3931	225	18	135	16	60	190045380	190045605
IS	11828	chr7	9830922	9832257	1335	3.4	chr7:9831091-9831435	LOC690617	LCP	+	Intragenic	1058	-705	hypothetical protein LOC690617	NP_001103075		NM_001109605	9830205	9831968	1763	344	29	225	16.9	65.4	9831091	9831435
IS	11828	chr7	9830922	9832257	1335	3.4	chr7:9831715-9832012	LOC690617	LCP	+	Intragenic	1658	-105	hypothetical protein LOC690617	NP_001103075		NM_001109605	9830205	9831968	1763	297	24	193	16.2	65	9831715	9832012
IS	12293	chr9	74662143	74662757	614	3.4	chr9:74662259-74662521	LOC363256	ICP	+	Intragenic	9865	-47514	hypothetical protein LOC363256	NP_001102272		NM_001108802	74652525	74709904	57379	262	21	176	16	67.2	74662259	74662521
IS	10342	chr18	29684796	29685570	774	3.41	chr18:29684777-29685584	Pcdha5	ICP	+	Promoter	-5757	-242851	protocadherin alpha 5	NP_955799	member of a family of synaptic cadherins and Reelin receptors, integral plasma membrane proteins that may play a critical role in maintaining specific cell-cell interactions in the brain [RGD].	NM_199505	29690937	29928031	237094	807	59	479	14.6	59.4	29684777	29685584
IS	11478	chr5	155036240	155036949	709	3.41	chr5:155036466-155036696	Zfp46	LCP	+	Intragenic	706	-3795	zinc finger protein 46	NP_001100161		NM_001106691	155035875	155040376	4501	230	19	142	16.5	61.7	155036466	155036696
IS	10843	chr20	46578217	46578776	559	3.42	chr20:46578260-46578574	Ostm1	ICP	+	Promoter	65	-4352	osteopetrosis associated transmembrane protein	NP_001025096		NM_001029925	46578352	46582769	4417	314	23	180	14.6	57.3	46578260	46578574
IS	8796	chr1	176707307	176707736	429	3.43	chr1:176707303-176709001	RGD1564255	HCP	-	Promoter	172	-1724	hypothetical protein LOC499253	NP_001120775		NM_001127303	176708324	176706428	1896	1698	144	1160	17	68.3	176707303	176709001
IS	9246	chr10	95410182	95410896	714	3.43	chr10:95410427-95410628	Kcnh6	ICP	+	Intragenic	9666	-11151	potassium voltage-gated channel, subfamily H,	NP_446389	potassium channel; expressed exclusively in the nervous system [RGD].	NM_053937	95400861	95421678	20817	201	17	114	16.9	56.7	95410427	95410628
IS	9975	chr14	33458877	33459692	815	3.43	chr14:33459295-33459496	Arl9	HCP	-	Promoter	-117	-7123	ADP-ribosylation factor-like 9	NP_997624	has similarity to the RAB subfamily of GTPases [RGD].	NM_212459	33459278	33452272	7006	201	20	126	19.9	62.7	33459295	33459496
IS	10135	chr16	20093758	20094462	704	3.43	chr16:20093870-20094326	Lpar2	ICP	-	Promoter	-8791	-14273	lysophosphatidic acid receptor 2	NP_001102579		NM_001109109	20085307	20079825	5482	456	30	281	13.2	61.6	20093870	20094326
IS	12301	chr9	90367716	90368425	709	3.43	chr9:90367913-90368199				Unknown										286	23	177	16.1	61.9	90367913	90368199
IS	8711	chr1	70431634	70432355	721	3.44	chr1:70431801-70432143				Unknown										342	27	220	15.8	64.3	70431801	70432143
IS	9254	chr10	100514380	100514809	429	3.44	chr10:100514517-100514923	Kcnj16	ICP	+	Promoter	541	-1228	potassium inwardly-rectifying channel J16	NP_445766	inward rectifying potassium channel; may be involved in renal pH regulation [RGD].	NM_053314	100514179	100515948	1769	406	30	228	14.8	56.2	100514517	100514923
IS	11002	chr3	147165639	147166378	739	3.44	chr3:147165859-147166108	Dlgap4	LCP	+	Intragenic	84762	-10041	discs, large homolog-associated protein 4	NP_775168	binds neuronal cell guanylate kinase PSD-95/SAP90; may play a role in post synaptic density structure and synaptic function [RGD].	NM_173145	147081221	147176024	94803	249	18	143	14.5	57.4	147165859	147166108
IS	8803	chr1	190049134	190049851	717	3.45	chr1:190049319-190049639	Tacc2	LCP	+	Intragenic	154543	-36310	transforming acidic coiled coil 2 isoform 1	NP_001004415	This gene encodes a member of the transforming, acidic coiled-coil (TACC) family of proteins. Members of this family are centrosomal proteins that interact with microtubules and tubulin. TACC proteins are thought to be involved in centrosome/mitotic spindle dynamics and gene regulation. Alternative splicing results in multiple transcript variants encoding different isoforms.	NM_001004415	189894936	190085789	190853	320	28	194	17.5	60.6	190049319	190049639
IS	12280	chr9	32921486	32922493	1007	3.46	chr9:32921295-32923219	Dst	LCP	+	Intragenic	164704	-129018	dystonin	NP_001101678		NM_001108208	32757553	33051275	293722	1924	128	1116	13.3	58	32921295	32923219
IS	8762	chr1	96120443	96121187	744	3.47	chr1:96120439-96121170				Unknown										731	49	427	13.4	58.4	96120439	96121170
IS	10585	chr2	43359060	43359770	710	3.47	chr2:43359264-43359547				Unknown										283	26	172	18.4	60.8	43359264	43359547
IS	10591	chr2	107336559	107337003	444	3.47	chr2:107336777-107336983				Unknown										206	20	131	19.4	63.6	107336777	107336983
IS	10596	chr2	139124304	139124928	624	3.47	chr2:139124455-139124657				Unknown										202	16	123	15.8	60.9	139124455	139124657
IS	9608	chr12	7353432	7354154	722	3.48	chr12:7353677-7353882				Unknown										205	16	126	15.6	61.5	7353677	7353882
IS	10599	chr2	144405641	144406900	1259	3.48	chr2:144405811-144406164	Sohlh2	ICP	+	Promoter	-60	-22514	spermatogenesis and oogenesis specific basic	NP_001030133		NM_001034961	144406047	144428501	22454	353	25	228	14.2	64.6	144405811	144406164
IS	10599	chr2	144405641	144406900	1259	3.48	chr2:144406394-144406676	Sohlh2	ICP	+	Promoter	488	-21966	spermatogenesis and oogenesis specific basic	NP_001030133		NM_001034961	144406047	144428501	22454	282	21	158	14.9	56	144406394	144406676
IS	8751	chr1	94087722	94088441	719	3.49	chr1:94087887-94088247	Atpbd3	ICP	+	Intragenic	4427	-1366	ATP binding domain 3	NP_001099721		NM_001106251	94083640	94089433	5793	360	26	241	14.4	66.9	94087887	94088247
IS	9521	chr11	45785271	45785956	685	3.49	chr11:45785511-45785725	Nfkbiz	HCP	+	Intragenic	9592	-25897	nuclear factor of kappa light polypeptide gene	NP_001100565		NM_001107095	45776026	45811515	35489	214	16	119	15	55.6	45785511	45785725
IS	8734	chr1	82447756	82448275	519	3.5	chr1:82447771-82448047				Unknown										276	23	189	16.7	68.5	82447771	82448047
IS	8797	chr1	180323253	180323976	723	3.51	chr1:180323488-180323714	Hs3st2	HCP	+	Intragenic	120811	-1116	heparan sulfate (glucosamine)	NP_852035	catalyzes the transfer of sulfate groups onto the 3-OH site of glucosamine groups in heparan sulfate proteoglycans [RGD].	NM_181370	180202790	180324717	121927	226	18	142	15.9	62.8	180323488	180323714
IS	9530	chr11	76363299	76363921	622	3.51	chr11:76363409-76363683				Unknown										274	31	212	22.6	77.4	76363409	76363683
IS	9906	chr14	9043974	9044599	625	3.51	chr14:9044191-9044439				Unknown										248	18	141	14.5	56.9	9044191	9044439
IS	10119	chr15_random	1293025	1293734	709	3.51	chr15_random:1293251-1293481				Unknown										230	17	136	14.8	59.1	1293251	1293481
IS	12310	chr9	109851108	109851719	611	3.51	chr9:109851240-109851557	Dlgap1	ICP	+	Intragenic	395488	-167340	discs, large (Drosophila) homolog-associated	NP_075235	binds the guanylate kinase-like domain of the PSD-95 family of synaptic ion channel clustering proteins; may play a role in protein-protein interactions at the synaptic junction [RGD].	NM_022946	109455910	110018738	562828	317	26	198	16.4	62.5	109851240	109851557
IS	11270	chr4	176720115	176720639	524	3.52	chr4:176720346-176720577	Pik3c2g	ICP	+	Intragenic	8261	-353633	phosphatidylinositol 3-kinase, C2 domain	NP_446375	catalyzes the addition of a phosphate group to the 3' position for phosphotidylinositol and PtdIns 4-P substrates, but not for PtdIns 4,5-P2 [RGD].	NM_053923	176712200	177074094	361894	231	21	135	18.2	58.4	176720346	176720577
IS	11898	chr7	124033574	124034288	714	3.52	chr7:124033742-124034092				Unknown										350	31	223	17.7	63.7	124033742	124034092
IS	12304	chr9	101187989	101188704	715	3.52	chr9:101188213-101188460				Unknown										247	19	149	15.4	60.3	101188213	101188460
IS	9267	chr10	109732833	109733546	713	3.53	chr10:109733039-109733313				Unknown										274	21	178	15.3	65	109733039	109733313
IS	9294	chr10	15093067	15093893	826	3.53	chr10:15093265-15093551	RGD1307381	LCP	+	Promoter	-956	-3856	hypothetical protein LOC360498	NP_001014138		NM_001014116	15094364	15097264	2900	286	21	171	14.7	59.8	15093265	15093551
IS	9908	chr14	10952373	10952992	619	3.53	chr14:10952519-10952897				Unknown										378	30	218	15.9	57.7	10952519	10952897
IS	10680	chr2	144405441	144406535	1094	3.53	chr2:144405811-144406164	Sohlh2	ICP	+	Promoter	-60	-22514	spermatogenesis and oogenesis specific basic	NP_001030133		NM_001034961	144406047	144428501	22454	353	25	228	14.2	64.6	144405811	144406164
IS	10680	chr2	144405441	144406535	1094	3.53	chr2:144406394-144406676	Sohlh2	ICP	+	Promoter	488	-21966	spermatogenesis and oogenesis specific basic	NP_001030133		NM_001034961	144406047	144428501	22454	282	21	158	14.9	56	144406394	144406676
IS	10960	chr3	4641213	4641917	704	3.53	chr3:4641452-4641653				Unknown										201	17	126	16.9	62.7	4641452	4641653
IS	11398	chr4	160899153	160900253	1100	3.53	chr4:160898870-160899194	Eno2	LCP	-	Promoter	-1309	-8030	enolase 2, gamma, neuronal	NP_647541	catalyzes the interconversion of 2-phosphoglycerate to phosphoenolpyruvate; may play a role in glycolysis [RGD]. Publication Note: This RefSeq record includes a subset of the publications that are available for this gene. Please see the Entrez Gene record to access additional publications.	NM_139325	160897723	160891002	6721	324	32	210	19.8	64.8	160898870	160899194
IS	11824	chr7	263527	264177	650	3.53	chr7:263751-263986	Mtm1	HCP	+	Intragenic	15909	-1412	X-linked myotubular myopathy gene 1	NP_001013065		NM_001013047	247959	265280	17321	235	19	135	16.2	57.4	263751	263986
IS	11840	chr7	10809139	10809782	643	3.53	chr7:10809355-10809615	Uqcr	ICP	+	Promoter	-6936	-11566	ubiquinol-cytochrome c reductase, 6.4kDa	NP_001119569		NM_001126097	10816421	10821051	4630	260	25	176	19.2	67.7	10809355	10809615
IS	9652	chr12	42757938	42758654	716	3.54	chr12:42758145-42758422	Acads	ICP	+	Promoter	-7000	-16245	acyl-Coenzyme A dehydrogenase, short chain	NP_071957		NM_022512	42765283	42774528	9245	277	24	171	17.3	61.7	42758145	42758422
IS	11236	chr4	20908336	20908957	621	3.54	chr4:20908476-20908691	Grm3	ICP	+	Intragenic	163160	-1209514	glutamate receptor, metabotropic 3	NP_001099182	activation induces neuronal activity [RGD]. Publication Note: This RefSeq record includes a subset of the publications that are available for this gene. Please see the Entrez Gene record to access additional publications.	NM_001105712	20745423	22118097	1372674	215	21	132	19.5	61.4	20908476	20908691
IS	8831	chr1	263890104	263890818	714	3.55	chr1:263890316-263890591				Unknown										275	23	154	16.7	56	263890316	263890591
IS	11513	chr5	170501851	170502565	714	3.55	chr5:170502083-170502300				Unknown										217	19	136	17.5	62.7	170502083	170502300
IS	12105	chr8	48423144	48423849	705	3.55	chr8:48423378-48423589	Dscaml1	ICP	+	Intragenic	17111	-300292	Down syndrome cell adhesion molecule-like 1	NP_001101611		NM_001108141	48406372	48723775	317403	211	17	126	16.1	59.7	48423378	48423589
IS	11453	chr5	73140435	73140934	499	3.56	chr5:73140483-73140691				Unknown										208	22	125	21.2	60.1	73140483	73140691
IS	11875	chr7	112622161	112622867	706	3.56	chr7:112622389-112622616				Unknown										227	19	138	16.7	60.8	112622389	112622616
IS	9914	chr14	33459051	33459697	646	3.57	chr14:33459295-33459496	Arl9	HCP	-	Promoter	-117	-7123	ADP-ribosylation factor-like 9	NP_997624	has similarity to the RAB subfamily of GTPases [RGD].	NM_212459	33459278	33452272	7006	201	20	126	19.9	62.7	33459295	33459496
IS	10224	chr16	82789819	82790355	536	3.57	chr16:82789753-82790009	Ing1	LCP	-	Promoter	438	-614	inhibitor of growth family, member 1	NP_001033680		NM_001038591	82790319	82789267	1052	256	22	146	17.2	57	82789753	82790009
IS	10344	chr18	29699580	29700284	704	3.57	chr18:29699780-29699999	Pcdha7	ICP	+	Promoter	-4141	-228141	protocadherin alpha 7	NP_955801	member of the CNR/Pcdh-alpha family of proteins which are thought to have a role in synaptic formation and stabilization [RGD].	NM_199507	29704030	29928030	224000	219	16	131	14.6	59.8	29699780	29699999
IS	12116	chr8	94890122	94890741	619	3.57	chr8:94890363-94890577				Unknown										214	21	137	19.6	64	94890363	94890577
IS	10156	chr16	82789533	82790253	720	3.58	chr16:82789753-82790009	Ing1	LCP	-	Promoter	438	-614	inhibitor of growth family, member 1	NP_001033680		NM_001038591	82790319	82789267	1052	256	22	146	17.2	57	82789753	82790009
IS	10966	chr3	11222460	11223172	712	3.58	chr3:11222670-11222938	Ppapdc3	LCP	+	Intragenic	13207	-1088	phosphatidic acid phosphatase type 2 domain	NP_001012349		NM_001012349	11209597	11223892	14295	268	19	166	14.2	61.9	11222670	11222938
IS	11953	chr7	11046158	11046976	818	3.58	chr7:11046253-11047033	RGD1562114	HCP	-	Promoter	-935	-2646	hypothetical protein LOC500795	NP_001102753		NM_001109283	11045708	11043997	1711	780	53	500	13.6	64.1	11046253	11047033
IS	8778	chr1	135862365	135862981	616	3.59	chr1:135862606-135862815				Unknown										209	16	125	15.3	59.8	135862606	135862815
IS	8748	chr1	90697941	90698650	709	3.59	chr1:90698178-90698387	Plekhf1	LCP	-	Promoter	447	-1021	pleckstrin homology domain containing, family F	NP_001013166		NM_001013148	90698729	90697261	1468	209	21	139	20.1	66.5	90698178	90698387
IS	10341	chr18	29678331	29678986	655	3.59	chr18:29678382-29678867	Pcdha4	ICP	+	Promoter	-4853	-249406	protocadherin alpha 4	NP_446385	binds dental epithelial and mesenchymal cells; may play a role in enamel and dentin formation during incisor development [RGD].	NM_053933	29683477	29928030	244553	485	32	299	13.2	61.6	29678382	29678867
IS	8720	chr1	77234629	77235338	709	3.6	chr1:77234826-77235116	Ptgir	LCP	+	Promoter	434	-1950	prostaglandin I receptor (IP)	NP_001071112		NM_001077644	77234537	77236921	2384	290	21	183	14.5	63.1	77234826	77235116
IS	10245	chr17	20932436	20933141	705	3.6	chr17:20932672-20932881				Unknown										209	18	122	17.2	58.4	20932672	20932881
IS	8780	chr1	138339194	138339891	697	3.61	chr1:138339394-138339678				Unknown										284	19	190	13.4	66.9	138339394	138339678
IS	9644	chr12	38016167	38016777	610	3.61	chr12:38016290-38016505				Unknown										215	17	121	15.8	56.3	38016290	38016505
IS	9196	chr10	15093060	15093803	743	3.62	chr10:15093265-15093551	RGD1307381	LCP	+	Promoter	-956	-3856	hypothetical protein LOC360498	NP_001014138		NM_001014116	15094364	15097264	2900	286	21	171	14.7	59.8	15093265	15093551
IS	10964	chr3	9299605	9300326	721	3.62	chr3:9299718-9300177	Lrrc8a	HCP	+	Intragenic	19323	-6359	leucine rich repeat containing 8A	NP_001019953		NM_001024782	9280624	9306306	25682	459	30	272	13.1	59.3	9299718	9300177
IS	12486	chrX	89770406	89770738	332	3.62	chrX:89770396-89771413	Ogt	ICP	+	Downstream	49536	4686	O-linked N-acetylglucosamine transferase	NP_058803	the catalytic p110 subunit of the enzyme involved in the dynamic O-GlcNAcylation of nuclear and cytosolic proteins [RGD]. Sequence Note: The sequence U76557.1 is from a chimeric clone. Only the O-linked N-acetylglucosamine transferase sequence region was propagated into this RefSeq record. Publication Note: This RefSeq record includes a subset of the publications that are available for this gene.…	NM_017107	89721368	89766218	44850	1017	105	677	20.6	66.6	89770396	89771413
IS	8818	chr1	211251148	211251804	656	3.63	chr1:211251353-211251628				Unknown										275	21	164	15.3	59.6	211251353	211251628
IS	11846	chr7	11046260	11047065	805	3.63	chr7:11046253-11047033	RGD1562114	HCP	-	Promoter	-935	-2646	hypothetical protein LOC500795	NP_001102753		NM_001109283	11045708	11043997	1711	780	53	500	13.6	64.1	11046253	11047033
IS	10575	chr1_random	3533000	3533902	902	3.64	chr1_random:3533437-3533756	Pik3ap1	ICP	+	Promoter	241	-182	phosphoinositide-3-kinase adaptor protein 1	NP_001099838		NM_001106368	3533355	3533778	423	319	23	203	14.4	63.6	3533437	3533756
IS	10570	chr1_random	3533257	3533964	707	3.64	chr1_random:3533437-3533756	Pik3ap1	ICP	+	Promoter	241	-182	phosphoinositide-3-kinase adaptor protein 1	NP_001099838		NM_001106368	3533355	3533778	423	319	23	203	14.4	63.6	3533437	3533756
IS	10445	chr19	24802346	24803060	714	3.64	chr19:24802547-24802832	Best2	LCP	+	Intragenic	4808	-1981	bestrophin 2	NP_001102365		NM_001108895	24797881	24804670	6789	285	21	161	14.7	56.5	24802547	24802832
IS	11853	chr7	12726879	12727578	699	3.64	chr7:12727123-12727335				Unknown										212	21	135	19.8	63.7	12727123	12727335
IS	8828	chr1	253477677	253478298	621	3.65	chr1:253477921-253478132				Unknown										211	17	128	16.1	60.7	253477921	253478132
IS	9206	chr10	21461351	21461872	521	3.65	chr10:21461434-21461649				Unknown										215	17	111	15.8	51.6	21461434	21461649
IS	10464	chr19	42711179	42711915	736	3.65	chr19:42711389-42711655	Cntnap4	ICP	+	Intragenic	151444	-139109	contactin associated protein-like 4	NP_001100902		NM_001107432	42560078	42850631	290553	266	23	139	17.3	52.3	42711389	42711655
IS	11238	chr4	56025581	56026150	569	3.65	chr4:56025805-56026055				Unknown										250	19	148	15.2	59.2	56025805	56026055
IS	8894	chr1	77234099	77235043	944	3.66	chr1:77234826-77235116	Ptgir	LCP	+	Promoter	434	-1950	prostaglandin I receptor (IP)	NP_001071112		NM_001077644	77234537	77236921	2384	290	21	183	14.5	63.1	77234826	77235116
IS	9258	chr10	105699503	105699974	471	3.66	chr10:105699632-105700059	Mif4gd	HCP	-	Promoter	-8161	-12626	MIF4G domain containing	NP_001014144		NM_001014122	105691684	105687219	4465	427	28	252	13.1	59	105699632	105700059
IS	11826	chr7	1857871	1858587	716	3.66	chr7:1858083-1858355	Pa2g4	HCP	-	Promoter	-4123	-11591	ErbB3-binding protein 1	NP_001004206	human and mouse homologs may be involved in coordinating ribosome biosynthesis and cell proliferation [RGD].	NM_001004206	1854096	1846628	7468	272	20	168	14.7	61.8	1858083	1858355
IS	9181	chr10	3335624	3336323	699	3.68	chr10:3335853-3336074				Unknown										221	17	124	15.4	56.1	3335853	3336074
IS	9489	chr10	100513354	100514645	1291	3.68	chr10:100514517-100514923	Kcnj16	ICP	+	Promoter	541	-1228	potassium inwardly-rectifying channel J16	NP_445766	inward rectifying potassium channel; may be involved in renal pH regulation [RGD].	NM_053314	100514179	100515948	1769	406	30	228	14.8	56.2	100514517	100514923
IS	9523	chr11	66774081	66774809	728	3.68	chr11:66774298-66774564				Unknown										266	20	169	15	63.5	66774298	66774564
IS	9697	chr12	15719394	15720796	1402	3.68	chr12:15719090-15719541	Gper	LCP	-	Promoter	578	-701	G protein-coupled estrogen receptor 1	NP_598257	an orphan G protein-coupled receptor found in lung [RGD].	NM_133573	15719893	15718614	1279	451	32	284	14.2	63	15719090	15719541
IS	9921	chr14	77880046	77880670	624	3.68	chr14:77880126-77880474	Lyar	HCP	-	Promoter	-7095	-20661	Ly1 antibody reactive clone	NP_001011911		NM_001011911	77873205	77859639	13566	348	26	209	14.9	60.1	77880126	77880474
IS	10791	chr20	4969419	4970128	709	3.68	chr20:4969561-4969963	Rxrb	HCP	-	Promoter	-8882	-15423	retinoid X receptor beta	NP_996731	forms a dimer with the retinoic acid receptor and other nuclear receptors; enhances retinoic acid receptor, thyroid hormone receptor, and vitamin D receptor transcriptional regulation activities [RGD].	NM_206849	4960880	4954339	6541	402	28	259	13.9	64.4	4969561	4969963
IS	9260	chr10	105993116	105993826	710	3.69	chr10:105993349-105993572	Recql5	ICP	-	Downstream	45827	6724	RecQ protein-like 5	NP_001099323		NM_001105853	106039287	106000184	39103	223	17	148	15.2	66.4	105993349	105993572
IS	9651	chr12	42717327	42718052	725	3.69	chr12:42717540-42717793	Cabp1	ICP	+	Intragenic	12820	-2899	calcium binding protein 1 isoform 1	NP_598213	component of calcium-mediated signal transduction; may be involved with the dendritic cytoskeleton [RGD].	NM_133529	42704846	42720565	15719	253	19	152	15	60.1	42717540	42717793
IS	8702	chr1	67551792	67552306	514	3.7	chr1:67550547-67552342				Unknown										1795	159	1194	17.7	66.5	67550547	67552342
IS	9604	chr12	6143381	6144006	625	3.7	chr12:6143551-6143910				Unknown										359	27	210	15	58.5	6143551	6143910
IS	10124	chr16	17588458	17589109	651	3.7	chr16:17588693-17588904	Mbl1	LCP	+	Promoter	-3021	-9061	mannose binding lectin (A)	NP_036731	N-terminal region has similarity to nonfibrillar collagens; C-terminal region, which includes the carbohydrate-binding domain, has similarity to the asialoglycoprotein receptor [RGD]. Publication Note: This RefSeq record includes a subset of the publications that are available for this gene. Please see the Entrez Gene record to access additional publications.	NM_012599	17591819	17597859	6040	211	16	120	15.2	56.9	17588693	17588904
IS	10588	chr2	79650260	79650974	714	3.7	chr2:79650461-79650759				Unknown										298	24	192	16.1	64.4	79650461	79650759
IS	11516	chr5	171033925	171034537	612	3.7	chr5:171034022-171034323	Megf6	LCP	+	Intragenic	11601	-16264	multiple EGF-like-domains 6	NP_075244		NM_022955	171022571	171050436	27865	301	23	192	15.3	63.8	171034022	171034323
IS	8774	chr1	129580074	129580692	618	3.71	chr1:129580274-129580480				Unknown										206	14	115	13.6	55.8	129580274	129580480
IS	9637	chr12	34362610	34363337	727	3.71	chr12:34362794-34363122				Unknown										328	26	208	15.9	63.4	34362794	34363122
IS	10318	chr18	111732	112630	898	3.71	chr18:111874-112187	F8	LCP	+	Promoter	-9103	-49978	coagulation factor VIII	NP_899160	human homolog is a cofactor for factor IXa; involved in blood coagulation [RGD].	NM_183331	121133	162008	40875	313	26	182	16.6	58.1	111874	112187
IS	10318	chr18	111732	112630	898	3.71	chr18:112586-112791	F8	LCP	+	Promoter	-8445	-49320	coagulation factor VIII	NP_899160	human homolog is a cofactor for factor IXa; involved in blood coagulation [RGD].	NM_183331	121133	162008	40875	205	15	116	14.6	56.6	112586	112791
IS	10457	chr19	38555072	38555696	624	3.71	chr19:38555279-38555556				Unknown										277	20	169	14.4	61	38555279	38555556
IS	11490	chr5	160356178	160356888	710	3.71	chr5:160356213-160356826	Zbtb17	HCP	+	Intragenic	18532	-2539	zinc finger and BTB domain containing 17	NP_001012105		NM_001012105	160337987	160359058	21071	613	39	387	12.7	63.1	160356213	160356826
IS	8805	chr1	198810174	198810883	709	3.72	chr1:198810402-198810634				Unknown										232	20	147	17.2	63.4	198810402	198810634
IS	8951	chr1	90698237	90699705	1468	3.72	chr1:90698178-90698387	Plekhf1	LCP	-	Promoter	447	-1021	pleckstrin homology domain containing, family F	NP_001013166		NM_001013148	90698729	90697261	1468	209	21	139	20.1	66.5	90698178	90698387
IS	10305	chr17	77593220	77594701	1481	3.72	chr17:77594766-77595008	Calml3	LCP	+	Promoter	374	-1001	calmodulin-like 3	NP_001012054		NM_001012054	77594513	77595888	1375	242	21	142	17.4	58.7	77594766	77595008
IS	11461	chr5	138693277	138693993	716	3.72	chr5:138693467-138693787				Unknown										320	24	209	15	65.3	138693467	138693787
IS	8685	chr1	3477601	3478329	728	3.73	chr1:3477839-3478044				Unknown										205	17	133	16.6	64.9	3477839	3478044
IS	11916	chr7	135967853	135968571	718	3.73	chr7:135968067-135968338				Unknown										271	19	148	14	54.6	135968067	135968338
IS	12474	chrX	7500472	7501093	621	3.73	chrX:7500572-7500865	Rhox7	LCP	+	Promoter	-8743	-17608	reproductive homeobox 7	NP_001020825		NM_001025654	7509461	7518326	8865	293	20	160	13.7	54.6	7500572	7500865
IS	8696	chr1	30598893	30599585	692	3.75	chr1:30599017-30599451				Unknown										434	33	287	15.2	66.1	30599017	30599451
IS	8728	chr1	79866663	79867372	709	3.76	chr1:79866762-79867251	Ethe1	HCP	+	Promoter	-8622	-23675	ethylmalonic encephalopathy 1	NP_001099704		NM_001106234	79875628	79890681	15053	489	45	347	18.4	71	79866762	79867251
IS	10365	chr18	77157377	77158108	731	3.76	chr18:77157574-77157868	Pqlc1	HCP	+	Intragenic	6528	-29880	PQ loop repeat containing 1	NP_001013207		NM_001013189	77151193	77187601	36408	294	26	158	17.7	53.7	77157574	77157868
IS	10343	chr18	29692365	29693110	745	3.77	chr18:29692361-29693096	Pcdha6	ICP	+	Promoter	-5147	-235302	protocadherin alpha 6	NP_955800	member of a the synaptic cadherins and Reelin receptor protein family [RGD].	NM_199506	29697875	29928030	230155	735	59	446	16.1	60.7	29692361	29693096
IS	11010	chr3	157695869	157696480	611	3.77	chr3:157696009-157696218				Unknown										209	16	137	15.3	65.6	157696009	157696218
IS	11488	chr5	159128744	159129460	716	3.77	chr5:159128969-159129214				Unknown										245	19	147	15.5	60	159128969	159129214
IS	11719	chr6	133081596	133082313	717	3.78	chr6:133081839-133082052				Unknown										213	18	153	16.9	71.8	133081839	133082052
IS	10456	chr19	38547422	38548142	720	3.79	chr19:38547604-38547931				Unknown										327	27	225	16.5	68.8	38547604	38547931
IS	10465	chr19	44569317	44570029	712	3.79	chr19:44569548-44569766	Wwox	HCP	+	Intragenic	53267	-260192	WW domain-containing oxidoreductase	NP_001099658		NM_001106188	44516390	44829849	313459	218	17	128	15.6	58.7	44569548	44569766
IS	10820	chr20	13825089	13825605	516	3.79	chr20:13825083-13825396				Unknown										313	24	187	15.3	59.7	13825083	13825396
IS	11718	chr6	132295675	132296297	622	3.79	chr6:132294228-132296281				Unknown										2053	190	1351	18.5	65.8	132294228	132296281
IS	9907	chr14	9516781	9517442	661	3.8	chr14:9517001-9517257				Unknown										256	21	159	16.4	62.1	9517001	9517257
IS	8757	chr1	95549811	95550523	712	3.81	chr1:95549973-95550341	Nosip	ICP	+	Intragenic	15976	-1046	nitric oxide synthase interacting protein	NP_001099730		NM_001106260	95534181	95551203	17022	368	32	235	17.4	63.9	95549973	95550341
IS	9641	chr12	35309221	35309935	714	3.81	chr12:35309462-35309665	Atp2a2	HCP	+	Intragenic	42964	-6674	ATPase, Ca++ transporting, cardiac muscle, slow	NP_001103609	sarco(endo)plasmic reticulum Ca(2+) ATPase; involved in calcium transport and cycling in the heart and in calcium sequestering in enamel forming cells [RGD].	NM_001110139	35266599	35316237	49638	203	18	128	17.7	63.1	35309462	35309665
IS	10252	chr17	33143420	33144127	707	3.81	chr17:33143490-33144031				Unknown										541	43	341	15.9	63	33143490	33144031
IS	11880	chr7	114326455	114327701	1246	3.81	chr7:114326671-114326921	Oplah	LCP	-	Degenerate_Downstream	15153	-57	5-oxoprolinase (ATP-hydrolysing)	NP_446356	catalyzes cleavage of 5-oxo-L-proline to form L-glutamate and is coupled to the hydrolysis of ATP to ADP and inorganic phosphate [RGD].	NM_053904	114341949	114326739	15210	250	22	156	17.6	62.4	114326671	114326921
IS	11880	chr7	114326455	114327701	1246	3.81	chr7:114326671-114326921	RGD1565316	LCP	+	Degenerate_Downstream	27733	4054	hypothetical protein LOC315091	NP_001108498		NM_001115026	114299063	114322742	23679	250	22	156	17.6	62.4	114326671	114326921
IS	11880	chr7	114326455	114327701	1246	3.81	chr7:114327212-114327456	RGD1565316	LCP	+	Downstream	28271	4592	hypothetical protein LOC315091	NP_001108498		NM_001115026	114299063	114322742	23679	244	21	159	17.2	65.2	114327212	114327456
IS	8697	chr1	35078117	35078836	719	3.82	chr1:35078299-35078632	Akap12	ICP	+	Downstream	35906	9703	A kinase anchor protein 12 isoform beta	NP_001028825		NM_001033653	35042559	35068762	26203	333	23	212	13.8	63.7	35078299	35078632
IS	10152	chr16	79494284	79495004	720	3.83	chr16:79494462-79494798				Unknown										336	28	194	16.7	57.7	79494462	79494798
IS	11854	chr7	16153701	16154278	577	3.83	chr7:16153576-16154211				Unknown										635	41	405	12.9	63.8	16153576	16154211
IS	11919	chr7	137344065	137344599	534	3.83	chr7:137344311-137344512				Unknown										201	18	118	17.9	58.7	137344311	137344512
IS	9255	chr10	102388539	102389158	619	3.84	chr10:102388498-102389069				Unknown										571	45	374	15.8	65.5	102388498	102389069
IS	9627	chr12	28986797	28987421	624	3.84	chr12:28986857-28987241				Unknown										384	26	242	13.5	63	28986857	28987241
IS	8799	chr1	186610756	186611470	714	3.85	chr1:186610923-186611286				Unknown										363	28	225	15.4	62	186610923	186611286
IS	10249	chr17	23982882	23983592	710	3.85	chr17:23983105-23983349	Kif13a	HCP	+	Intragenic	164144	-24730	kinesin family member 13A	NP_001100932		NM_001107462	23819083	24007957	188874	244	17	144	13.9	59	23983105	23983349
IS	10327	chr18	282672	283401	729	3.85	chr18:282890-283153				Unknown										263	22	143	16.7	54.4	282890	283153
IS	10587	chr2	77353684	77354402	718	3.85	chr2:77353909-77354151	Myo10	ICP	+	Intragenic	171003	-31866	myosin X	NP_001101127		NM_001107657	77183027	77385896	202869	242	17	143	14	59.1	77353909	77354151
IS	11724	chr6	136058589	136059327	738	3.85	chr6:136058819-136059053				Unknown										234	21	150	17.9	64.1	136058819	136059053
IS	8933	chr1	85314087	85315283	1196	3.86	chr1:85313978-85314254	Lrfn3	ICP	-	Promoter	279	-5200	leucine rich repeat and fibronectin type III	NP_001100972		NM_001107502	85314395	85308916	5479	276	25	174	18.1	63	85313978	85314254
IS	11246	chr4	76523250	76524334	1084	3.86	chr4:76523050-76524311	Sspo	LCP	+	Promoter	-9619	-63689	SCO-spondin	NP_001007017		NM_001007016	76533299	76587369	54070	1261	108	821	17.1	65.1	76523050	76524311
IS	9202	chr10	20953782	20954489	707	3.87	chr10:20953882-20954363				Unknown										481	35	272	14.6	56.5	20953882	20954363
IS	9250	chr10	98872664	98873373	709	3.87	chr10:98872892-98873123	Slc16a6	HCP	+	Intragenic	19719	-2179	solute carrier family 16, member 6	NP_942055	human homolog is a monocarboxylate transporter [RGD].	NM_198760	98853288	98875186	21898	231	16	130	13.9	56.3	98872892	98873123
IS	9899	chr14	7229304	7229832	528	3.87	chr14:7229488-7229816	LOC498330	ICP	+	Intragenic	7362	-643	hypothetical protein LOC498330	NP_001017495		NM_001017495	7222290	7230295	8005	328	23	182	14	55.5	7229488	7229816
IS	11225	chr3_random	1654317	1655030	713	3.87	chr3_random:1654556-1654758				Unknown										202	18	110	17.8	54.5	1654556	1654758
IS	11496	chr5	165914760	165915287	527	3.87	chr5:165914800-165915032				Unknown										232	18	137	15.5	59.1	165914800	165915032
IS	11492	chr5	160759857	160760564	707	3.87	chr5:160760061-160760337	Ctrc	LCP	-	Promoter	-4867	-17709	chymotrypsin C (caldecrin)	NP_001071117		NM_001077649	160755332	160742490	12842	276	20	161	14.5	58.3	160760061	160760337
IS	9240	chr10	92058776	92059485	709	3.88	chr10:92059016-92059222	RGD1307851	LCP	+	Intragenic	1269	-202	hypothetical protein LOC287741	NP_001013883		NM_001013861	92057850	92059321	1471	206	16	124	15.5	60.2	92059016	92059222
IS	10023	chr15	23749341	23750051	710	3.89	chr15:23749502-23749870				Unknown										368	27	235	14.7	63.9	23749502	23749870
IS	10247	chr17	22211037	22211751	714	3.89	chr17:22211240-22211519				Unknown										279	22	160	15.8	57.3	22211240	22211519
IS	12134	chr8	123422802	123423521	719	3.89	chr8:123423014-123423284				Unknown										270	26	156	19.3	57.8	123423014	123423284
IS	12093	chr8	19928630	19929344	714	3.89	chr8:19928749-19929192	Eif3g	ICP	-	Promoter	-8853	-13338	eukaryotic translation initiation factor 3,	NP_001013113		NM_001013095	19920117	19915632	4485	443	31	274	14	61.9	19928749	19929192
IS	11874	chr7	111405501	111406219	718	3.9	chr7:111405731-111405964	Gpr20	LCP	-	Promoter	594	-468	G protein-coupled receptor 20	NP_071552	a nucleotide receptor and may be a homolog of the human pyrimidinoceptor [RGD].	NM_022216	111406441	111405379	1062	233	18	148	15.5	63.5	111405731	111405964
IS	9532	chr11	82032637	82033258	621	3.91	chr11:82032773-82032996				Unknown										223	18	138	16.1	61.9	82032773	82032996
IS	11469	chr5	150694360	150694879	519	3.91	chr5:150693330-150695382	Mecr	HCP	+	Promoter	-5773	-30863	trans-2-enoyl-CoA reductase, mitochondrial	NP_058905	interacts with PPARalpha and with various nuclear hormone receptors [RGD].	NM_017209	150700129	150725219	25090	2052	180	1272	17.5	62	150693330	150695382
IS	12125	chr8	113169287	113170006	719	3.91	chr8:113169295-113169972	Mst1r	ICP	+	Promoter	-6343	-19878	macrophage stimulating 1 receptor	NP_001100325		NM_001106855	113175976	113189511	13535	677	55	428	16.2	63.2	113169295	113169972
IS	8741	chr1	85309183	85309707	524	3.92	chr1:85309160-85309522				Unknown										362	28	225	15.5	62.2	85309160	85309522
IS	9192	chr10	14129073	14129787	714	3.92	chr10:14129285-14129555	Spsb3	HCP	+	Promoter	-6397	-11503	splA/ryanodine receptor domain and SOCS box	NP_001100458		NM_001106988	14135817	14140923	5106	270	20	170	14.8	63	14129285	14129555
IS	9603	chr12	4995501	4996130	629	3.92	chr12:4995721-4995974				Unknown										253	18	142	14.2	56.1	4995721	4995974
IS	9609	chr12	10976483	10977192	709	3.92	chr12:10976713-10976941				Unknown										228	17	136	14.9	59.6	10976713	10976941
IS	11015	chr3	159986685	159987423	738	3.92	chr3:159986896-159987156				Unknown										260	23	167	17.7	64.2	159986896	159987156
IS	11267	chr4	174126484	174127223	739	3.92	chr4:174126656-174127001				Unknown										345	28	194	16.2	56.2	174126656	174127001
IS	11463	chr5	145451557	145452285	728	3.92	chr5:145451790-145452017	Stk40	HCP	+	Promoter	-5815	-42450	serine/threonine kinase 40	NP_898879		NM_183056	145457718	145494353	36635	227	16	122	14.1	53.7	145451790	145452017
IS	11729	chr6	137909958	137910674	716	3.92	chr6:137910185-137910415	Mta1	LCP	+	Intragenic	250300	-233682	metastasis associated 1	NP_072110	high expression of this protein correlates with the metastatic potential of cells; may have a role in gene regulation [RGD].	NM_022588	137660000	138143982	483982	230	19	153	16.5	66.5	137910185	137910415
IS	8907	chr1	80160730	80162074	1344	3.93	chr1:80161639-80161920	Dmrtc2	ICP	+	Degenerate_Promoter	2	-7177	doublesex and mab-3 related transcription factor	NP_001102610		NM_001109140	80161777	80168956	7179	281	22	171	15.7	60.9	80161639	80161920
IS	8907	chr1	80160730	80162074	1344	3.93	chr1:80161639-80161920	Lypd4	ICP	-	Degenerate_Promoter	-300	-5850	Ly6/Plaur domain containing 4	NP_001103765		NM_001110295	80161479	80155929	5550	281	22	171	15.7	60.9	80161639	80161920
IS	9525	chr11	67175795	67176444	649	3.93	chr11:67175984-67176210	Pdia5	ICP	+	Intragenic	58349	-28383	protein disulfide isomerase-associated 5	NP_001014147		NM_001014125	67117748	67204480	86732	226	18	160	15.9	70.8	67175984	67176210
IS	9766	chr13	44078978	44079699	721	3.93	chr13:44079199-44079454				Unknown										255	21	147	16.5	57.6	44079199	44079454
IS	11491	chr5	160370300	160371014	714	3.93	chr5:160370386-160370901				Unknown										515	36	287	14	55.7	160370386	160370901
IS	11845	chr7	11030297	11031044	747	3.93	chr7:11030540-11030745				Unknown										205	17	131	16.6	63.9	11030540	11030745
IS	8686	chr1	6113762	6114476	714	3.94	chr1:6113946-6114259				Unknown										313	25	160	16	51.1	6113946	6114259
IS	9189	chr10	13079304	13080208	904	3.95	chr10:13079294-13080232	Tceb2	HCP	-	Downstream	9856	5053	transcription elongation factor B (SIII),	NP_112391	positive regulatory subunit of the general transcription factor SIII heterotrimer; acts to increast the rate of RNA polymerase II transcription; regulates RNA polymerase II elongation complex activity [RGD].	NM_031129	13089619	13084816	4803	938	69	525	14.7	56	13079294	13080232
IS	10479	chr19	53037016	53037752	736	3.95	chr19:53037197-53037517				Unknown										320	25	209	15.6	65.3	53037197	53037517
IS	12135	chr8	124389561	124390283	722	3.97	chr8:124389768-124390051	Acvr2b	HCP	+	Intragenic	25580	-5825	activin receptor IIB	NP_113742	plays a role in reproductive physiology and endocrinology [RGD].	NM_031554	124364329	124395734	31405	283	21	180	14.8	63.6	124389768	124390051
IS	10032	chr15	36178601	36179317	716	3.98	chr15:36178741-36179157				Unknown										416	28	242	13.5	58.2	36178741	36179157
IS	10611	chr2	189652660	189653374	714	3.98	chr2:189652867-189653136				Unknown										269	19	166	14.1	61.7	189652867	189653136
IS	10821	chr20	14154768	14155383	615	3.98	chr20:14155004-14155211				Unknown										207	16	128	15.5	61.8	14155004	14155211
IS	10825	chr20	19160414	19161128	714	3.99	chr20:19160560-19160963				Unknown										403	29	247	14.4	61.3	19160560	19160963
IS	11856	chr7	21527000	21528296	1296	3.99	chr7:21527236-21527451	Nuak1	HCP	+	Intragenic	65931	-1725	NUAK family, SNF1-like kinase, 1	NP_001100244		NM_001106774	21461412	21529068	67656	215	17	138	15.8	64.2	21527236	21527451
IS	11856	chr7	21527000	21528296	1296	3.99	chr7:21527979-21528249	Nuak1	HCP	+	Intragenic	66702	-954	NUAK family, SNF1-like kinase, 1	NP_001100244		NM_001106774	21461412	21529068	67656	270	24	167	17.8	61.9	21527979	21528249
IS	9207	chr10	29544052	29544416	364	4	chr10:29543959-29544771				Unknown										812	56	519	13.8	63.9	29543959	29544771
IS	9653	chr12	43030979	43031700	721	4	chr12:43031208-43031444				Unknown										236	18	131	15.3	55.5	43031208	43031444
IS	12281	chr9	33037758	33038476	718	4.01	chr9:33037891-33038317	Dst	LCP	+	Intragenic	280551	-13171	dystonin	NP_001101678		NM_001108208	32757553	33051275	293722	426	29	235	13.6	55.2	33037891	33038317
IS	8746	chr1	89231733	89232447	714	4.02	chr1:89231953-89232194	Tshz3	LCP	+	Intragenic	68196	-4226	teashirt zinc finger family member 3	NP_001100976		NM_001107506	89163877	89236299	72422	241	20	143	16.6	59.3	89231953	89232194
IS	10478	chr19	52920994	52921703	709	4.02	chr19:52921212-52921460				Unknown										248	22	167	17.7	67.3	52921212	52921460
IS	11233	chr4	6218584	6219298	714	4.02	chr4:6218758-6219103	Kcnh2	HCP	+	Intragenic	26287	-5354	voltage-gated potassium channel, subfamily H,	NP_446401	voltage gated potassium channel pore forming subunit [RGD].	NM_053949	6192643	6224284	31641	345	32	226	18.6	65.5	6218758	6219103
IS	11716	chr6	126678330	126679055	725	4.02	chr6:126678571-126678781				Unknown										210	16	116	15.2	55.2	126678571	126678781
IS	12138	chr8	124579166	124579869	703	4.03	chr8:124579205-124579817				Unknown										612	45	368	14.7	60.1	124579205	124579817
IS	12268	chr8_random	664673	665380	707	4.03	chr8_random:664816-665210	Trim42	LCP	+	Intragenic	4195	-16862	tripartite motif-containing 42	NP_001013977		NM_001013955	660818	681875	21057	394	29	234	14.7	59.4	664816	665210
IS	8698	chr1	41551319	41552059	740	4.04	chr1:41551543-41551779	Fndc1	ICP	+	Intragenic	29643	-31694	fibronectin type III domain containing 1	NP_001033704		NM_001038615	41522018	41583355	61337	236	18	155	15.3	65.7	41551543	41551779
IS	9615	chr12	15138153	15140025	1872	4.04	chr12:15137965-15138470				Unknown										505	39	326	15.4	64.6	15137965	15138470
IS	9615	chr12	15138153	15140025	1872	4.04	chr12:15138710-15139066				Unknown										356	23	225	12.9	63.2	15138710	15139066
IS	9615	chr12	15138153	15140025	1872	4.04	chr12:15139467-15139843				Unknown										376	27	243	14.4	64.6	15139467	15139843
IS	10618	chr2	200716976	200717689	713	4.04	chr2:200717173-200717473	Kcnd3	HCP	+	Intragenic	7546	-207241	potassium voltage gated channel, Shal-related	NP_113927	voltage-gated K+ channel that generates an A type K+ current [RGD]. Publication Note: This RefSeq record includes a subset of the publications that are available for this gene. Please see the Entrez Gene record to access additional publications.	NM_031739	200709777	200924564	214787	300	24	180	16	60	200717173	200717473
IS	9252	chr10	99868933	99869553	620	4.05	chr10:99869177-99869383	Map2k6	ICP	+	Intragenic	9597	-105166	mitogen-activated protein kinase kinase 6	NP_446155	activator of p38 MAPK; may play a role in cardiac hypertrophic and failure conditions [RGD].	NM_053703	99859683	99974446	114763	206	16	115	15.5	55.8	99869177	99869383
IS	9518	chr11	32718157	32718870	713	4.05	chr11:32718336-32718659				Unknown										323	29	183	18	56.7	32718336	32718659
IS	9910	chr14	11320380	11321116	736	4.05	chr14:11320555-11320873				Unknown										318	26	188	16.4	59.1	11320555	11320873
IS	11251	chr4	80775307	80776021	714	4.05	chr4:80775552-80775756				Unknown										204	16	126	15.7	61.8	80775552	80775756
IS	11250	chr4	79843243	79843953	710	4.05	chr4:79843448-79843728	Snx10	LCP	+	Intragenic	54033	-9625	sorting nexin 10	NP_001013103		NM_001013085	79789555	79853213	63658	280	22	143	15.7	51.1	79843448	79843728
IS	12438	chrUn	20565879	20566683	804	4.05	chrUn:20565871-20566749				Unknown										878	65	554	14.8	63.1	20565871	20566749
IS	8687	chr1	15403626	15404145	519	4.07	chr1:15403688-15404046				Unknown										358	35	212	19.6	59.2	15403688	15404046
IS	12137	chr8	124534727	124535463	736	4.07	chr8:124534975-124535176				Unknown										201	16	109	15.9	54.2	124534975	124535176
IS	9915	chr14	33591097	33592141	1044	4.08	chr14:33591634-33591879				Unknown										245	22	161	18	65.7	33591634	33591879
IS	12142	chr8	127001218	127001931	713	4.08	chr8:127001365-127001765	Pcbp2	LCP	+	Downstream	2645	1293	poly(rC) binding protein 2	NP_001013241		NM_001013223	126998920	127000272	1352	400	29	255	14.5	63.8	127001365	127001765
IS	9905	chr14	8203523	8204232	709	4.09	chr14:8203713-8203979				Unknown										266	20	152	15	57.1	8203713	8203979
IS	12130	chr8	118905820	118906539	719	4.12	chr8:118905854-118906479				Unknown										625	43	367	13.8	58.7	118905854	118906479
IS	10018	chr15	12676588	12677288	700	4.13	chr15:12676779-12677076				Unknown										297	23	184	15.5	62	12676779	12677076
IS	11260	chr4	127958781	127959527	746	4.13	chr4:127958876-127959383				Unknown										507	35	308	13.8	60.7	127958876	127959383
IS	10642	chr2	25988579	25989293	714	4.15	chr2:25988593-25988940	F2r	ICP	-	Promoter	306	-2967	coagulation factor II receptor	NP_037082	plays a role in blood coagulation, inflammatory response, and cell proliferation; mediates signal transduction via MAP kinase and other signaling pathways [RGD]. Publication Note: This RefSeq record includes a subset of the publications that are available for this gene. Please see the Entrez Gene record to access additional publications.	NM_012950	25989072	25985799	3273	347	25	201	14.4	57.9	25988593	25988940
IS	9607	chr12	6379454	6380171	717	4.16	chr12:6379684-6379910				Unknown										226	16	119	14.2	52.7	6379684	6379910
IS	10320	chr18	125631	126777	1146	4.16	chr18:125388-125926	F8	LCP	+	Intragenic	4524	-36351	coagulation factor VIII	NP_899160	human homolog is a cofactor for factor IXa; involved in blood coagulation [RGD].	NM_183331	121133	162008	40875	538	42	311	15.6	57.8	125388	125926
IS	10320	chr18	125631	126777	1146	4.16	chr18:126257-126507	F8	LCP	+	Intragenic	5249	-35626	coagulation factor VIII	NP_899160	human homolog is a cofactor for factor IXa; involved in blood coagulation [RGD].	NM_183331	121133	162008	40875	250	24	147	19.2	58.8	126257	126507
IS	8832	chr1	264957188	264957807	619	4.17	chr1:264957267-264957549	LOC361776	ICP	+	Intragenic	19110	-24212	hypothetical protein LOC361776	NP_001014191		NM_001014169	264938298	264981620	43322	282	20	160	14.2	56.7	264957267	264957549
IS	10795	chr20	5351363	5352091	728	4.17	chr20:5351575-5351810	Itpr3	HCP	+	Intragenic	59263	-5808	inositol 1,4,5-triphosphate receptor 3	NP_037270	receptor for Inositol 1,4,5-trisphosphate (IP3); involved in second messenger signaling [RGD]. Publication Note: This RefSeq record includes a subset of the publications that are available for this gene. Please see the Entrez Gene record to access additional publications.	NM_013138	5292429	5357500	65071	235	17	154	14.5	65.5	5351575	5351810
IS	11012	chr3	159428679	159429393	714	4.17	chr3:159428774-159429282				Unknown										508	38	322	15	63.4	159428774	159429282
IS	8754	chr1	94938362	94939521	1159	4.18	chr1:94938988-94940178	RGD1310111	LCP	+	Promoter	-3204	-5466	hypothetical protein LOC292875	NP_001009643		NM_001009643	94942787	94945049	2262	1190	103	784	17.3	65.9	94938988	94940178
IS	8754	chr1	94938362	94939521	1159	4.18	chr1:94938515-94938892	RGD1310111	LCP	+	Promoter	-4084	-6346	hypothetical protein LOC292875	NP_001009643		NM_001009643	94942787	94945049	2262	377	26	236	13.8	62.6	94938515	94938892
IS	9929	chr14	100784633	100785342	709	4.18	chr14:100784865-100785089	Spred2	HCP	+	Intragenic	86436	-12739	sprouty-related, EVH1 domain containing 2	NP_001040559		NM_001047094	100698541	100797716	99175	224	17	121	15.2	54	100784865	100785089
IS	11445	chr5	48511393	48511912	519	4.18	chr5:48511604-48511867				Unknown										263	18	137	13.7	52.1	48511604	48511867
IS	11863	chr7	30513134	30513846	712	4.18	chr7:30513328-30513631	Hal	LCP	+	Promoter	-7433	-37666	histidine ammonia lyase	NP_058855	catalyzes the conversion of histidine to urocanic acid [RGD].	NM_017159	30520912	30551145	30233	303	26	168	17.2	55.4	30513328	30513631
IS	12303	chr9	93139626	93140340	714	4.18	chr9:93139832-93140105				Unknown										273	20	159	14.7	58.2	93139832	93140105
IS	11694	chr6	11458646	11459331	685	4.22	chr6:11458864-11459111				Unknown										247	21	133	17	53.8	11458864	11459111
IS	11891	chr7	118064230	118065254	1024	4.22	chr7:118064288-118064490				Unknown										202	14	133	13.9	65.8	118064288	118064490
IS	11891	chr7	118064230	118065254	1024	4.22	chr7:118064763-118065186				Unknown										423	34	285	16.1	67.4	118064763	118065186
IS	11879	chr7	114279180	114279893	713	4.22	chr7:114279419-114279634	Grina	HCP	+	Intragenic	2303	-813	glutamate receptor, ionotropic, N-methyl	NP_695220	subunit of the N-methyl-D-aspartate receptor; activation leads to opening of a cation selective channel [RGD].	NM_153308	114277223	114280339	3116	215	18	128	16.7	59.5	114279419	114279634
IS	9917	chr14	44838249	44839058	809	4.23	chr14:44838247-44839069	RGD1359713	LCP	+	Intragenic	22771	-7556	hypothetical protein LOC305340	NP_001005882		NM_001005882	44815887	44846214	30327	822	56	484	13.6	58.9	44838247	44839069
IS	11852	chr7	12591011	12591791	780	4.24	chr7:12591256-12591465	Ilvbl	ICP	-	Downstream	11788	1734	ilvB (bacterial acetolactate synthase)-like	NP_001102208		NM_001108738	12603148	12593094	10054	209	17	136	16.3	65.1	12591256	12591465
IS	11852	chr7	12591011	12591791	780	4.24	chr7:12591684-12591929	Ilvbl	ICP	-	Downstream	11342	1288	ilvB (bacterial acetolactate synthase)-like	NP_001102208		NM_001108738	12603148	12593094	10054	245	24	163	19.6	66.5	12591684	12591929
IS	9633	chr12	33000626	33001340	714	4.25	chr12:33000792-33001147				Unknown										355	31	222	17.5	62.5	33000792	33001147
IS	9085	chr1	200940853	200941852	999	4.27	chr1:200941110-200941456	LOC502372	ICP	-	Promoter	64	-10921	hypothetical protein LOC502372	NP_001020229		NM_001025058	200941347	200930362	10985	346	26	232	15	67.1	200941110	200941456
IS	10258	chr17	79461214	79461838	624	4.27	chr17:79461454-79461674				Unknown										220	17	125	15.5	56.8	79461454	79461674
IS	8779	chr1	136233725	136234439	714	4.28	chr1:136233959-136234172				Unknown										213	19	115	17.8	54	136233959	136234172
IS	11868	chr7	66056935	66057673	738	4.3	chr7:66057181-66057385				Unknown										204	16	124	15.7	60.8	66057181	66057385
IS	9624	chr12	27463130	27463840	710	4.31	chr12:27463276-27463676	Tyw1	ICP	-	Promoter	-8366	-94570	tRNA-yW synthesizing protein 1 homolog	NP_001100607		NM_001107137	27455110	27368906	86204	400	29	230	14.5	57.5	27463276	27463676
IS	9610	chr12	11164273	11164982	709	4.33	chr12:11164391-11164840	Usp42	LCP	+	Intragenic	13082	-5453	ubiquitin specific peptidase 42	NP_001099379		NM_001105909	11151533	11170068	18535	449	31	287	13.8	63.9	11164391	11164840
IS	10012	chr14_random	266864	267535	671	4.33	chr14_random:267062-267357				Unknown										295	21	181	14.2	61.4	267062	267357
IS	12440	chrUn	23320018	23320547	529	4.33	chrUn:23320032-23320510				Unknown										478	46	318	19.2	66.5	23320032	23320510
IS	8804	chr1	196932014	196932733	719	4.34	chr1:196932193-196932529				Unknown										336	27	210	16.1	62.5	196932193	196932529
IS	9528	chr11	72426453	72427187	734	4.34	chr11:72426690-72426901				Unknown										211	24	137	22.7	64.9	72426690	72426901
IS	10828	chr20	19358599	19359316	717	4.34	chr20:19358837-19359055				Unknown										218	18	126	16.5	57.8	19358837	19359055
IS	11008	chr3	156862294	156863004	710	4.34	chr3:156862502-156862751				Unknown										249	19	140	15.3	56.2	156862502	156862751
IS	10355	chr18	31119163	31119877	714	4.36	chr18:31119234-31119791				Unknown										557	43	325	15.4	58.3	31119234	31119791
IS	10817	chr20	12802913	12803527	614	4.37	chr20:12803055-12803455	Prmt2	ICP	+	Intragenic	2857	-13759	protein arginine N-methyltransferase 2	NP_001020315		NM_001025144	12800398	12817014	16616	400	29	220	14.5	55	12803055	12803455
IS	11467	chr5	146798223	146798937	714	4.37	chr5:146798366-146798775	Gjb5	LCP	-	Downstream	5094	4279	gap junction protein, beta 5	NP_062114	may form gap junction channels [RGD].	NM_019241	146803664	146802849	815	409	29	256	14.2	62.6	146798366	146798775
IS	9256	chr10	104690297	104691016	719	4.39	chr10:104690541-104690750				Unknown										209	19	137	18.2	65.6	104690541	104690750
IS	10978	chr3	60171641	60172358	717	4.39	chr3:60171857-60172110				Unknown										253	19	135	15	53.4	60171857	60172110
IS	11835	chr7	10048436	10049164	728	4.39	chr7:10048559-10049004				Unknown										445	38	295	17.1	66.3	10048559	10049004
IS	10580	chr2	25988426	25989138	712	4.4	chr2:25988593-25988940	F2r	ICP	-	Promoter	306	-2967	coagulation factor II receptor	NP_037082	plays a role in blood coagulation, inflammatory response, and cell proliferation; mediates signal transduction via MAP kinase and other signaling pathways [RGD]. Publication Note: This RefSeq record includes a subset of the publications that are available for this gene. Please see the Entrez Gene record to access additional publications.	NM_012950	25989072	25985799	3273	347	25	201	14.4	57.9	25988593	25988940
IS	12285	chr9	36438476	36439086	610	4.4	chr9:36438714-36438920				Unknown										206	15	108	14.6	52.4	36438714	36438920
IS	10629	chr2	247104441	247105156	715	4.41	chr2:247104664-247104900				Unknown										236	20	126	16.9	53.4	247104664	247104900
IS	9614	chr12	14577887	14578605	718	4.42	chr12:14577942-14578528				Unknown										586	45	356	15.4	60.8	14577942	14578528
IS	11884	chr7	115913460	115914084	624	4.42	chr7:115913513-115913963				Unknown										450	40	300	17.8	66.7	115913513	115913963
IS	11899	chr7	127371115	127372114	999	4.44	chr7:127371111-127372144	Trabd	HCP	+	Promoter	-8002	-18975	TraB domain containing	NP_001100258		NM_001106788	127379629	127390602	10973	1033	74	627	14.3	60.7	127371111	127372144
IS	9186	chr10	12847184	12847898	714	4.45	chr10:12847198-12847869				Unknown										671	54	423	16.1	63	12847198	12847869
IS	10122	chr16	7140245	7140955	710	4.45	chr16:7140414-7140761	Btd	LCP	+	Intragenic	29237	-1219	biotinidase	NP_001012047		NM_001012047	7111350	7141806	30456	347	30	199	17.3	57.3	7140414	7140761
IS	11505	chr5	168229210	168229927	717	4.45	chr5:168229410-168229707				Unknown										297	21	190	14.1	64	168229410	168229707
IS	12111	chr8	61526264	61526982	718	4.45	chr8:61526482-61526732				Unknown										250	19	149	15.2	59.6	61526482	61526732
IS	8766	chr1	98650591	98651307	716	4.47	chr1:98650784-98651082				Unknown										298	22	164	14.8	55	98650784	98651082
IS	9924	chr14	85387304	85388034	730	4.49	chr14:85387297-85387996				Unknown										699	48	443	13.7	63.4	85387297	85387996
IS	10610	chr2	186309582	186310004	422	4.49	chr2:186309682-186310162				Unknown										480	35	327	14.6	68.1	186309682	186310162
IS	10818	chr20	13029961	13030680	719	4.49	chr20:13030130-13030489				Unknown										359	26	206	14.5	57.4	13030130	13030489
IS	10120	chr16	3794241	3794960	719	4.5	chr16:3794459-3794717	Wnt5a	HCP	+	Intragenic	12564	-5037	wingless-related MMTV integration site 5A	NP_072153	mouse homolog regulates chondrocyte differentiation and proliferation in longitudinal skeletal growth of long bones [RGD].	NM_022631	3782024	3799625	17601	258	25	161	19.4	62.4	3794459	3794717
IS	10568	chr1_random	20635	21344	709	4.52	chr1_random:20866-21088	Deadc1	ICP	+	Downstream	3446	2605	deaminase domain containing 1	NP_001108500		NM_001115028	17531	18372	841	222	18	130	16.2	58.6	20866	21088
IS	9251	chr10	99866713	99867432	719	4.52	chr10:99866930-99867192	Map2k6	ICP	+	Intragenic	7378	-107385	mitogen-activated protein kinase kinase 6	NP_446155	activator of p38 MAPK; may play a role in cardiac hypertrophic and failure conditions [RGD].	NM_053703	99859683	99974446	114763	262	22	145	16.8	55.3	99866930	99867192
IS	10298	chr17	48289764	48290473	709	4.55	chr17:48289598-48289833	Hist1h2aa	ICP	-	Degenerate_Promoter	205	-188	histone cluster 1, H2aa	NP_068611	a histone variant specifically expressed during mammalian spermatogenesis [RGD].	NM_021839	48289920	48289527	393	235	24	152	20.4	64.7	48289598	48289833
IS	10298	chr17	48289764	48290473	709	4.55	chr17:48289598-48289833	Hist1h2ba	HCP	+	Degenerate_Promoter	-469	-939	histone cluster 1, H2ba	NP_072169	a histone variant that is specifically expressed during rat spermatogenesis [RGD].	NM_022643	48290184	48290654	470	235	24	152	20.4	64.7	48289598	48289833
IS	11925	chr7	139561572	139562285	713	4.55	chr7:139561805-139562030	Slc4a8	ICP	+	Intragenic	331833	-13714	Na-driven Cl-HCO3 exchanger NDCBE1-A	NP_955791	may act as a bicarbonate transporter [RGD].	NM_199497	139230084	139575631	345547	225	17	127	15.1	56.4	139561805	139562030
IS	8806	chr1	200940943	200941648	705	4.56	chr1:200941110-200941456	LOC502372	ICP	-	Promoter	64	-10921	hypothetical protein LOC502372	NP_001020229		NM_001025058	200941347	200930362	10985	346	26	232	15	67.1	200941110	200941456
IS	10248	chr17	22703064	22703792	728	4.57	chr17:22703300-22703526				Unknown										226	19	120	16.8	53.1	22703300	22703526
IS	11444	chr5	25531120	25531729	609	4.57	chr5:25531288-25531631				Unknown										343	29	221	16.9	64.4	25531288	25531631
IS	10141	chr16	47092542	47093262	720	4.58	chr16:47092679-47093098				Unknown										419	32	245	15.3	58.5	47092679	47093098
IS	10812	chr20	10837999	10838713	714	4.58	chr20:10838235-10838446				Unknown										211	17	138	16.1	65.4	10838235	10838446
IS	9898	chr14	7080780	7081399	619	4.59	chr14:7080864-7081393				Unknown										529	38	313	14.4	59.2	7080864	7081393
IS	12491	chrX	128967186	128967845	659	4.59	chrX:128967378-128967588				Unknown										210	20	139	19	66.2	128967378	128967588
IS	8704	chr1	67568676	67569401	725	4.61	chr1:67568921-67569131	Zfp524	LCP	-	Promoter	-4523	-5572	zinc finger protein 524	NP_001102375		NM_001108905	67564503	67563454	1049	210	18	127	17.1	60.5	67568921	67569131
IS	10589	chr2	93423216	93423926	710	4.63	chr2:93423452-93423669	Impa1	ICP	+	Intragenic	7603	-14687	Inositol (myo)-1(or 4)-monophosphatase 1	NP_114446	enzyme which controls the levels of brain inositol [RGD].	NM_032057	93415957	93438247	22290	217	16	120	14.7	55.3	93423452	93423669
IS	10830	chr20	20001954	20002695	741	4.63	chr20:20002179-20002410				Unknown										231	19	119	16.5	51.5	20002179	20002410
IS	11234	chr4	8524776	8525524	748	4.63	chr4:8524993-8525246	Reln	LCP	+	Intragenic	374247	-84022	reelin	NP_536319	regulates neuronal cell migration during development; plays a role in locomotor behavior [RGD]. Publication Note: This RefSeq record includes a subset of the publications that are available for this gene. Please see the Entrez Gene record to access additional publications.	NM_080394	8150872	8609141	458269	253	17	150	13.4	59.3	8524993	8525246
IS	11021	chr3	161405725	161406454	729	4.64	chr3:161405937-161406209				Unknown										272	21	156	15.4	57.4	161405937	161406209
IS	9901	chr14	7860801	7861543	742	4.68	chr14:7860993-7861295	Mapk10	ICP	+	Intragenic	141550	-149550	mitogen activated protein kinase 10	NP_036938	a stress-activated protein kinase [RGD].	NM_012806	7719594	8010694	291100	302	25	162	16.6	53.6	7860993	7861295
IS	12121	chr8	111840944	111841654	710	4.68	chr8:111841086-111841488				Unknown										402	28	248	13.9	61.7	111841086	111841488
IS	11241	chr4	64391354	64392092	738	4.71	chr4:64391591-64391796				Unknown										205	16	103	15.6	50.2	64391591	64391796
IS	10022	chr15	22824613	22825317	704	4.74	chr15:22824793-22825053				Unknown										260	20	144	15.4	55.4	22824793	22825053
IS	10975	chr3	51591768	51592477	709	4.74	chr3:51592007-51592213				Unknown										206	15	118	14.6	57.3	51592007	51592213
IS	9203	chr10	20976248	20976959	711	4.77	chr10:20976243-20976950				Unknown										707	52	396	14.7	56	20976243	20976950
IS	12118	chr8	102093349	102094069	720	4.79	chr8:102093528-102093849				Unknown										321	28	175	17.4	54.5	102093528	102093849
IS	10257	chr17	79327652	79328402	750	4.81	chr17:79327878-79328126				Unknown										248	20	141	16.1	56.9	79327878	79328126
IS	11264	chr4	162291687	162292419	732	4.81	chr4:162291931-162292140				Unknown										209	17	120	16.3	57.4	162291931	162292140
IS	11001	chr3	147119998	147120710	712	4.82	chr3:147120163-147120518	Dlgap4	LCP	+	Intragenic	39119	-55684	discs, large homolog-associated protein 4	NP_775168	binds neuronal cell guanylate kinase PSD-95/SAP90; may play a role in post synaptic density structure and synaptic function [RGD].	NM_173145	147081221	147176024	94803	355	27	236	15.2	66.5	147120163	147120518
IS	11441	chr5	22934491	22935205	714	4.83	chr5:22934720-22934945				Unknown										225	16	116	14.2	51.6	22934720	22934945
IS	10619	chr2	203981075	203982068	993	4.84	chr2:203981069-203982108				Unknown										1039	66	614	12.7	59.1	203981069	203982108
IS	9763	chr13	12877585	12878179	594	4.9	chr13:12877391-12877607				Unknown										216	17	143	15.7	66.2	12877391	12877607
IS	9763	chr13	12877585	12878179	594	4.9	chr13:12877696-12877969				Unknown										273	18	174	13.2	63.7	12877696	12877969
IS	9261	chr10	106211461	106212175	714	5	chr10:106211682-106211936				Unknown										254	18	164	14.2	64.6	106211682	106211936
IS	10262	chr17	94818857	94819577	720	5.01	chr17:94819040-94819371				Unknown										331	24	203	14.5	61.3	94819040	94819371
IS	10325	chr18	235637	236506	869	5.01	chr18:236093-236345				Unknown										252	22	142	17.5	56.3	236093	236345
IS	10847	chr20	49143645	49144359	714	5.01	chr20:49143803-49144178	Prep	HCP	+	Intragenic	119074	-680	prolyl endopeptidase	NP_112614	may play a role in neuropeptide catabolism; expressed in brain; most enzyme activity is localized to the cytosolic fraction [RGD].	NM_031324	49024916	49144670	119754	375	34	233	18.1	62.1	49143803	49144178
IS	10326	chr18	238045	239045	1000	5.03	chr18:237473-239036				Unknown										1563	112	911	14.3	58.3	237473	239036
IS	11465	chr5	146755715	146756434	719	5.08	chr5:146755960-146756161				Unknown										201	17	127	16.9	63.2	146755960	146756161
IS	12483	chrX	69904597	69905844	1247	5.08	chrX:69902456-69906031				Unknown										3575	240	2116	13.4	59.2	69902456	69906031
IS	8783	chr1	154137747	154138451	704	5.09	chr1:154137965-154138208				Unknown										243	19	140	15.6	57.6	154137965	154138208
IS	9784	chr13	106130634	106131346	712	5.11	chr13:106130869-106131083	Ptpn14	HCP	+	Intragenic	126042	-19186	protein tyrosine phosphatase, non-receptor type	NP_001100670		NM_001107200	106004934	106150162	145228	214	16	134	15	62.6	106130869	106131083
IS	10615	chr2	196113232	196113941	709	5.13	chr2:196113471-196113677				Unknown										206	20	122	19.4	59.2	196113471	196113677
IS	10260	chr17	87503859	87504589	730	5.15	chr17:87504097-87504318				Unknown										221	19	126	17.2	57	87504097	87504318
IS	9647	chr12	41597391	41598057	666	5.17	chr12:41597578-41597896	Ccdc60	ICP	+	Intragenic	41682	-119595	coiled-coil domain containing 60	NP_001030117		NM_001034945	41556055	41717332	161277	318	28	230	17.6	72.3	41597578	41597896
IS	9781	chr13	99098197	99098909	712	5.18	chr13:99098335-99098742				Unknown										407	34	229	16.7	56.3	99098335	99098742
IS	12305	chr9	101377061	101377771	710	5.18	chr9:101377285-101377526				Unknown										241	24	127	19.9	52.7	101377285	101377526
IS	10578	chr2	24937683	24938388	705	5.2	chr2:24937805-24938242				Unknown										437	29	237	13.3	54.2	24937805	24938242
IS	10121	chr16	6606855	6607573	718	5.21	chr16:6606955-6607451				Unknown										496	37	311	14.9	62.7	6606955	6607451
IS	10471	chr19	48324577	48325281	704	5.28	chr19:48324785-48325048				Unknown										263	18	132	13.7	50.2	48324785	48325048
IS	12488	chrX	94353309	94354033	724	5.3	chrX:94353383-94353933	Taf9b	ICP	-	Promoter	-1735	-11576	TAF9B RNA polymerase II, TATA box binding	NP_598299	clone which is induced in differentiated PC12 cells during apoptosis; transcriptional coactivator of Tp53 protein [RGD].	NM_133615	94351923	94342082	9841	550	57	330	20.7	60	94353383	94353933
IS	9623	chr12	26165378	26166597	1219	5.38	chr12:26165371-26166548				Unknown										1177	77	720	13.1	61.2	26165371	26166548
IS	12446	chrUn	49821001	49821655	654	5.39	chrUn:49821137-49821525				Unknown										388	35	250	18	64.4	49821137	49821525
IS	10015	chr15	3367214	3367828	614	5.44	chr15:3367400-3367712				Unknown										312	21	168	13.5	53.8	3367400	3367712
IS	11905	chr7	129683007	129683728	721	5.48	chr7:129683218-129683496				Unknown										278	27	158	19.4	56.8	129683218	129683496
IS	10581	chr2	30426204	30427472	1268	5.64	chr2:30426268-30426825				Unknown										557	36	303	12.9	54.4	30426268	30426825
IS	10581	chr2	30426204	30427472	1268	5.64	chr2:30426982-30427227				Unknown										245	20	143	16.3	58.4	30426982	30427227
IS	10962	chr3	7193862	7194572	710	5.71	chr3:7194074-7194341	Olfm1	HCP	+	Intragenic	23787	-1138	olfactomedin 1	NP_446025	gene produces four distinct neuronal glycoproteins [RGD].	NM_053573	7170420	7195345	24925	267	21	154	15.7	57.7	7194074	7194341
IS	9656	chr12	44058828	44059547	719	5.77	chr12:44059001-44059352	Cmklr1	LCP	+	Intragenic	2650	-1867	G-protein coupled chemoattractant-like receptor	NP_071554	may be a member of the chemokine receptor family [RGD].	NM_022218	44056526	44061043	4517	351	27	216	15.4	61.5	44059001	44059352
IS	8784	chr1	154158815	154160135	1320	6.27	chr1:154159048-154159273				Unknown										225	17	124	15.1	55.1	154159048	154159273
IS	8784	chr1	154158815	154160135	1320	6.27	chr1:154159639-154159843				Unknown										204	20	127	19.6	62.3	154159639	154159843
IS	9076	chr1	189589444	189590560	1116	6.39	chr1:189588018-189589572	Fgfr2	HCP	-	Promoter	484	-105821	fibroblast growth factor receptor 2 isoform a	NP_036844	may play a role in mesodermal cell differentiation [RGD]. Publication Note: This RefSeq record includes a subset of the publications that are available for this gene. Please see the Entrez Gene record to access additional publications.	NM_012712	189589279	189482974	106305	1554	135	981	17.4	63.1	189588018	189589572
IS	11693	chr6	11122435	11123739	1304	7.94	chr6:11122598-11122954				Unknown										356	26	216	14.6	60.7	11122598	11122954
IS	11693	chr6	11122435	11123739	1304	7.94	chr6:11123244-11123463				Unknown										219	20	137	18.3	62.6	11123244	11123463
Cap	2695	chr3	154515203	154516138	935	2	chr3:154516108-154516467	RGD1305754	HCP	+	Promoter	75	-18147	hypothetical protein LOC296349	NP_001100007		NM_001106537	154516212	154534434	18222	359	39	259	21.7	72.1	154516108	154516467
Cap	2778	chr4	161044866	161045389	523	2	chr4:161044580-161045421	Ptms	HCP	-	Promoter	145	-3759	parathymosin	NP_114181	binds zinc; inactivates phosphofructokinase-1 in a reversible and zinc-dependent manner [RGD].	NM_031975	161045145	161041241	3904	841	97	567	23.1	67.4	161044580	161045421
Cap	1169	chr13	76951719	76952038	319	2.02	chr13:76951849-76952081				Unknown										232	21	142	18.1	61.2	76951849	76952081
Cap	1788	chr18	115717	115951	234	2.02	chr18:115651-116085	F8	LCP	+	Promoter	-5265	-46140	coagulation factor VIII	NP_899160	human homolog is a cofactor for factor IXa; involved in blood coagulation [RGD].	NM_183331	121133	162008	40875	434	35	266	16.1	61.3	115651	116085
Cap	1600	chr16	80900601	80900930	329	2.03	chr16:80900117-80900969	Gas6	HCP	+	Promoter	385	-30386	growth arrest specific 6	NP_476441	provides protection of neurons against serum deprivation-induced apoptosis [RGD]. Publication Note: This RefSeq record includes a subset of the publications that are available for this gene. Please see the Entrez Gene record to access additional publications.	NM_057100	80900158	80930929	30771	852	74	575	17.4	67.5	80900117	80900969
Cap	2518	chr3	171052673	171052930	257	2.05	chr3:171052666-171052908				Unknown										242	17	144	14	59.5	171052666	171052908
Cap	593	chr10	56647739	56647979	240	2.06	chr10:56647714-56647989	Spem1	LCP	-	Promoter	-3603	-4892	sperm maturation 1	NP_001103123		NM_001109653	56644248	56642959	1289	275	20	182	14.5	66.2	56647714	56647989
Cap	1020	chr12	29036383	29036629	246	2.06	chr12:29036387-29036699	Piwil1	ICP	-	Promoter	-52	-20885	piwi like homolog 1	NP_001102323		NM_001108853	29036491	29015658	20833	312	27	215	17.3	68.9	29036387	29036699
Cap	1692	chr17	747299	747534	235	2.06	chr17:745762-749486	Irx2	HCP	-	Promoter	1326	-4091	Iroquois related homeobox 2	NP_001034594		NM_001039505	748950	743533	5417	3724	308	2328	16.5	62.5	745762	749486
Cap	2788	chr4	185977694	185978209	515	2.07	chr4:185977305-185978196	Rps4y2	HCP	+	Promoter	356	-578	ribosomal protein S4, Y-linked 2	NP_001103082		NM_001109612	185977394	185978328	934	891	78	546	17.5	61.3	185977305	185978196
Cap	6	chr1	7684892	7685418	526	2.08	chr1:7684837-7685456	Stx11	HCP	-	Promoter	232	-1388	syntaxin 11	NP_001020809		NM_001025638	7685378	7683758	1620	619	62	391	20	63.2	7684837	7685456
Cap	32	chr1	76484347	76484581	234	2.09	chr1:76484181-76484624	Slc8a2	LCP	+	Intragenic	10465	-14222	solute carrier family 8 (sodium/calcium	NP_511174	isoform 2 of sodium/calcium exchanger; regulates intracellular calcium levels and maintains calcium homeostasis; may be important for the control of synaptic plasticity [RGD]. Publication Note: This RefSeq record includes a subset of the publications that are available for this gene. Please see the Entrez Gene record to access additional publications.	NM_078619	76473937	76498624	24687	443	46	289	20.8	65.2	76484181	76484624
Cap	583	chr10	45880447	45880966	519	2.09	chr10:45880591-45880799	Olr1462	LCP	-	Promoter	380	-576	olfactory receptor Olr1462	NP_001001097	Olfactory receptors interact with odorant molecules in the nose, to initiate a neuronal response that triggers the perception of a smell. The olfactory receptor proteins are members of a large family of G-protein-coupled receptors (GPCR) arising from single coding-exon genes. Olfactory receptors share a 7-transmembrane domain structure with many neurotransmitter and hormone receptors and are resp…	NM_001001097	45881075	45880119	956	208	14	129	13.5	62	45880591	45880799
Cap	1113	chr12	29036000	29036422	422	2.09	chr12:29036387-29036699	Piwil1	ICP	-	Promoter	-52	-20885	piwi like homolog 1	NP_001102323		NM_001108853	29036491	29015658	20833	312	27	215	17.3	68.9	29036387	29036699
Cap	2761	chr4	76709687	76710111	424	2.09	chr4:76709705-76710352	RGD1559747	ICP	+	Promoter	-7071	-13993	hypothetical protein LOC312310	NP_001101330		NM_001107860	76717099	76724021	6922	647	48	416	14.8	64.3	76709705	76710352
Cap	3065	chr5	168549941	168550475	534	2.1	chr5:168549998-168550203				Unknown										205	22	111	21.5	54.1	168549998	168550203
Cap	3301	chr6	74668980	74669334	354	2.1	chr6:74669188-74669390				Unknown										202	22	133	21.8	65.8	74669188	74669390
Cap	548	chr1	263129913	263131017	1104	2.11	chr1:263130803-263131208	Tdrd1	HCP	+	Promoter	29	-43225	tudor domain containing 1	NP_001099672		NM_001106202	263130976	263174230	43254	405	44	271	21.7	66.9	263130803	263131208
Cap	1125	chr12	35266260	35266499	239	2.11	chr12:35266093-35267545	Atp2a2	HCP	+	Promoter	220	-49418	ATPase, Ca++ transporting, cardiac muscle, slow	NP_001103609	sarco(endo)plasmic reticulum Ca(2+) ATPase; involved in calcium transport and cycling in the heart and in calcium sequestering in enamel forming cells [RGD].	NM_001110139	35266599	35316237	49638	1452	179	977	24.7	67.3	35266093	35267545
Cap	1013	chr12	22473704	22474238	534	2.11	chr12:22473879-22474228	Fkbp6	HCP	+	Degenerate_Promoter	52	-70731	FK506 binding protein 6	NP_001099392		NM_001105922	22474001	22544784	70783	349	34	232	19.5	66.5	22473879	22474228
Cap	1013	chr12	22473704	22474238	534	2.11	chr12:22473879-22474228	Trim50	LCP	-	Degenerate_Promoter	-3530	-18504	tripartite motif-containing 50	NP_851594		NM_181080	22470523	22455549	14974	349	34	232	19.5	66.5	22473879	22474228
Cap	957	chr11	67437922	67438161	239	2.12	chr11:67436237-67438135	Adcy5	HCP	-	Promoter	282	-146219	adenylate cyclase 5	NP_072122	enzyme that catalyzes the formation of the secondary messenger cyclic adenosine monophosphate [RGD].	NM_022600	67437468	67290967	146501	1898	191	1256	20.1	66.2	67436237	67438135
Cap	1823	chr18	30568943	30569387	444	2.12	chr18:30568897-30569114	Pcdhga1	ICP	+	Degenerate_Promoter	201	-185200	protocadherin gamma subfamily A, 1	NP_001032217		NM_001037140	30568804	30754205	185401	217	21	138	19.4	63.6	30568897	30569114
Cap	1823	chr18	30568943	30569387	444	2.12	chr18:30568897-30569114	RGD1563159	ICP	-	Degenerate_Promoter	-6364	-7130	hypothetical protein LOC361312	NP_001101898		NM_001108428	30562641	30561875	766	217	21	138	19.4	63.6	30568897	30569114
Cap	2670	chr3	144030147	144030781	634	2.12	chr3:144030741-144031193	Dnmt3b	ICP	+	Promoter	231	-38297	DNA methyltransferase 3B	NP_001003959		NM_001003959	144030736	144069264	38528	452	56	287	24.8	63.5	144030741	144031193
Cap	3689	chr8	60335869	60336295	426	2.12	chr8:60335941-60336476				Unknown										535	35	333	13.1	62.2	60335941	60336476
Cap	2494	chr3	154224153	154224387	234	2.13	chr3:154223958-154224684				Unknown										726	82	529	22.6	72.9	154223958	154224684
Cap	78	chr1	96308509	96308956	447	2.14	chr1:96308737-96308968	Grwd1	ICP	-	Promoter	-1707	-7293	glutamate-rich WD repeat containing 1	NP_001012067		NM_001012067	96307145	96301559	5586	231	17	147	14.7	63.6	96308737	96308968
Cap	2464	chr3	17069973	17070212	239	2.14	chr3:17069990-17070252				Unknown										262	22	166	16.8	63.4	17069990	17070252
Cap	2582	chr3	58352140	58352564	424	2.14	chr3:58351576-58352814	Hnrnpa3	HCP	+	Promoter	175	-8735	heterogeneous nuclear ribonucleoprotein A3	NP_937765	an mRNA binding protein involved in cytoplasmic trafficking of messages to specific sites in the cell [RGD].	NM_198132	58352020	58360930	8910	1238	139	839	22.5	67.8	58351576	58352814
Cap	2757	chr4	75838719	75838999	280	2.15	chr4:75838752-75838969				Unknown										217	18	127	16.6	58.5	75838752	75838969
Cap	889	chr11	15149753	15150092	339	2.16	chr11:15149369-15150593				Unknown										1224	167	935	27.3	76.4	15149369	15150593
Cap	1808	chr18	27173723	27174058	335	2.16	chr18:27173726-27174033				Unknown										307	26	210	16.9	68.4	27173726	27174033
Cap	3030	chr5	151689126	151689457	331	2.16	chr5:151689170-151689392				Unknown										222	19	132	17.1	59.5	151689170	151689392
Cap	3318	chr6	136710594	136711118	524	2.16	chr6:136710638-136710861				Unknown										223	19	126	17	56.5	136710638	136710861
Cap	3887	chr9	35015681	35016015	334	2.16	chr9:35015642-35016037	Hs6st1	HCP	+	Intragenic	37399	-2450	heparan sulfate 6-O-sulfotransferase 1	NP_001101680		NM_001108210	34978440	35018289	39849	395	32	243	16.2	61.5	35015642	35016037
Cap	995	chr12	2472127	2472471	344	2.17	chr12:2472026-2472357	Fcer2a	LCP	+	Downstream	28138	2517	Fc receptor, IgE, low affinity II, alpha	NP_001029096	cell surface receptor; binds innumoglobulin (Ig)E and IgA antibodies [RGD].	NM_001033924	2444053	2469674	25621	331	31	222	18.7	67.1	2472026	2472357
Cap	2474	chr3	78367141	78367380	239	2.17	chr3:78366656-78368032	RGD1564664	HCP	-	Promoter	586	-807	hypothetical protein LOC499839	NP_001103525		NM_001110055	78367930	78366537	1393	1376	132	878	19.2	63.8	78366656	78368032
Cap	3684	chr8	46227029	46227358	329	2.17	chr8:46227048-46227293				Unknown										245	19	148	15.5	60.4	46227048	46227293
Cap	54	chr1	84445408	84445837	429	2.19	chr1:84445425-84445711	Dpf1	HCP	+	Intragenic	1426	-7311	D4, zinc and double PHD fingers family 1	NP_001099199	neurospecific gene that is developmentally regulated [RGD].	NM_001105729	84444142	84452879	8737	286	31	208	21.7	72.7	84445425	84445711
Cap	1008	chr12	16829635	16830055	420	2.19	chr12:16829643-16829847	Il3ra	LCP	-	Promoter	290	-4043	interleukin 3 receptor, alpha chain	NP_640353	a putative cytokine receptor expressed in testis,lung and spleen [RGD].	NM_139260	16830035	16825702	4333	204	22	136	21.6	66.7	16829643	16829847
Cap	2514	chr3	164992972	164993208	236	2.19	chr3:164992903-164993270	Stx16	ICP	+	Promoter	-2102	-29798	syntaxin 16	NP_001102080		NM_001108610	164995188	165022884	27696	367	28	212	15.3	57.8	164992903	164993270
Cap	3876	chr9	5898919	5899481	562	2.19	chr9:5898917-5899802	Dazl	HCP	+	Promoter	256	-16476	deleted in azoospermia-like	NP_001102884		NM_001109414	5899103	5915835	16732	885	76	607	17.2	68.6	5898917	5899802
Cap	4052	chrUn	25211424	25211853	429	2.19	chrUn:25211545-25211808				Unknown										263	25	171	19	65	25211545	25211808
Cap	103	chr1	162037850	162038526	676	2.2	chr1:162038086-162038296	Olr150	LCP	-	Promoter	-4990	-5921	olfactory receptor Olr150	NP_001000739	Olfactory receptors interact with odorant molecules in the nose, to initiate a neuronal response that triggers the perception of a smell. The olfactory receptor proteins are members of a large family of G-protein-coupled receptors (GPCR) arising from single coding-exon genes. Olfactory receptors share a 7-transmembrane domain structure with many neurotransmitter and hormone receptors and are resp…	NM_001000739	162033201	162032270	931	210	19	132	18.1	62.9	162038086	162038296
Cap	3191	chr5	143981103	143981729	626	2.2	chr5:143980628-143983946	Pou3f1	HCP	+	Promoter	741	-2240	POU domain, class 3, transcription factor 1	NP_620193	may act as a transcriptional regulator of gene expression during Schwann cell differentiation and myelination [RGD].	NM_138838	143981546	143984527	2981	3318	289	1951	17.4	58.8	143980628	143983946
Cap	4080	chrX	28727232	28727566	334	2.2	chrX:28726660-28727532				Unknown										872	58	516	13.3	59.2	28726660	28727532
Cap	4095	chrX	160442829	160443168	339	2.2	chrX:160442867-160443115				Unknown										248	25	161	20.2	64.9	160442867	160443115
Cap	29	chr1	72954789	72955128	339	2.21	chr1:72954711-72955117				Unknown										406	29	254	14.3	62.6	72954711	72955117
Cap	631	chr10	108451419	108451753	334	2.21	chr10:108451470-108451677	C1qtnf1	LCP	+	Intragenic	19590	-519	C1q and tumor necrosis factor related protein 1	NP_001007676		NM_001007675	108431983	108452092	20109	207	16	126	15.5	60.9	108451470	108451677
Cap	1177	chr13	103082954	103084198	1244	2.21	chr13:103083712-103083954	RGD1309586	HCP	+	Intragenic	676	-2494	hypothetical protein LOC364073	NP_001102328		NM_001108858	103083157	103086327	3170	242	19	140	15.7	57.9	103083712	103083954
Cap	1177	chr13	103082954	103084198	1244	2.21	chr13:103083131-103083461	RGD1309586	HCP	+	Promoter	139	-3031	hypothetical protein LOC364073	NP_001102328		NM_001108858	103083157	103086327	3170	330	31	201	18.8	60.9	103083131	103083461
Cap	1352	chr14	105087445	105087774	329	2.21	chr14:105087246-105087954				Unknown										708	59	463	16.7	65.4	105087246	105087954
Cap	1786	chr18	109327	109659	332	2.21	chr18:109160-109810				Unknown										650	45	394	13.8	60.6	109160	109810
Cap	1790	chr18	141847	142091	244	2.21	chr18:141807-142117	F8	LCP	+	Intragenic	20829	-20046	coagulation factor VIII	NP_899160	human homolog is a cofactor for factor IXa; involved in blood coagulation [RGD].	NM_183331	121133	162008	40875	310	24	174	15.5	56.1	141807	142117
Cap	2232	chr2	203752097	203753098	1001	2.21	chr2:203751686-203752180	Amigo1	ICP	+	Promoter	-698	-2179	adhesion molecule with Ig like domain 1	NP_996764		NM_206881	203752631	203754112	1481	494	59	325	23.9	65.8	203751686	203752180
Cap	2907	chr4	149650625	149651071	446	2.21	chr4:149650272-149650554	Sec13	ICP	-	Promoter	36	-13354	SEC13 homolog	NP_001006979		NM_001006978	149650449	149637059	13390	282	25	176	17.7	62.4	149650272	149650554
Cap	3436	chr7	11046353	11046779	426	2.21	chr7:11046253-11047033	RGD1562114	HCP	-	Promoter	-935	-2646	hypothetical protein LOC500795	NP_001102753		NM_001109283	11045708	11043997	1711	780	53	500	13.6	64.1	11046253	11047033
Cap	3430	chr7	10322453	10323071	618	2.21	chr7:10322525-10322884	Timm13	HCP	+	Downstream	2746	1643	translocase of inner mitochondrial membrane 13	NP_665724	small zinc finger protein involved in mitochondrial carrier import [RGD].	NM_145781	10319958	10321061	1103	359	31	238	17.3	66.3	10322525	10322884
Cap	3703	chr8	112943150	112943594	444	2.21	chr8:112943105-112943314				Unknown										209	15	130	14.4	62.2	112943105	112943314
Cap	559	chr10	12817235	12817664	429	2.22	chr10:12817177-12817404	Znf213	HCP	-	Downstream	12531	5617	zinc finger protein 213	NP_001099234		NM_001105764	12829821	12822907	6914	227	16	123	14.1	54.2	12817177	12817404
Cap	3495	chr7	132832955	132833386	431	2.22	chr7:132833006-132833219				Unknown										213	16	110	15	51.6	132833006	132833219
Cap	25	chr1	68995752	68996204	452	2.23	chr1:68995731-68995933				Unknown										202	22	137	21.8	67.8	68995731	68995933
Cap	85	chr1	122704086	122704706	620	2.23	chr1:122702937-122705720	Igf1r	HCP	+	Promoter	-647	-285679	insulin-like growth factor I receptor	NP_434694	receptor for Igf-1; involved in induction of cell cycle progression and survival in many cell types [RGD]. Publication Note: This RefSeq record includes a subset of the publications that are available for this gene. Please see the Entrez Gene record to access additional publications.	NM_052807	122704975	122990007	285032	2783	259	1709	18.6	61.4	122702937	122705720
Cap	71	chr1	95312361	95312605	244	2.23	chr1:95311788-95312766	Nup62	HCP	+	Degenerate_Downstream	24259	8732	nucleoporin 62	NP_075586	component of the nuclear pore complex; may be involved in nuclear pore transport [RGD].	NM_023098	95288018	95303545	15527	978	64	612	13.1	62.6	95311788	95312766
Cap	71	chr1	95312361	95312605	244	2.23	chr1:95311788-95312766	Tbc1d17	ICP	-	Degenerate_Downstream	9367	1143	TBC1 domain family, member 17	NP_001099728		NM_001106258	95321644	95313420	8224	978	64	612	13.1	62.6	95311788	95312766
Cap	1921	chr19	14314051	14314480	429	2.23	chr19:14314192-14314607	Tfip11	HCP	+	Intragenic	6824	-5408	tuftelin interacting protein 11	NP_001008292		NM_001008291	14307575	14319807	12232	415	32	263	15.4	63.4	14314192	14314607
Cap	3021	chr5	145451557	145451987	430	2.23	chr5:145451790-145452017	Stk40	HCP	+	Promoter	-5815	-42450	serine/threonine kinase 40	NP_898879		NM_183056	145457718	145494353	36635	227	16	122	14.1	53.7	145451790	145452017
Cap	1575	chr16	18651405	18651740	335	2.24	chr16:18651301-18652078	Gtpbp3	HCP	+	Promoter	-7649	-12752	GTP binding protein 3 (mitochondrial)	NP_001011919		NM_001011919	18659338	18664441	5103	777	56	503	14.4	64.7	18651301	18652078
Cap	1926	chr19	25215821	25216065	244	2.24	chr19:25215868-25216090				Unknown										222	15	125	13.5	56.3	25215868	25216090
Cap	2080	chr2	200709265	200709719	454	2.24	chr2:200708874-200710148	Kcnd3	HCP	+	Promoter	-266	-215053	potassium voltage gated channel, Shal-related	NP_113927	voltage-gated K+ channel that generates an A type K+ current [RGD]. Publication Note: This RefSeq record includes a subset of the publications that are available for this gene. Please see the Entrez Gene record to access additional publications.	NM_031739	200709777	200924564	214787	1274	129	857	20.3	67.3	200708874	200710148
Cap	2455	chr3	6007961	6008395	434	2.24	chr3:6007828-6008221				Unknown										393	33	255	16.8	64.9	6007828	6008221
Cap	3067	chr5	169659162	169659586	424	2.25	chr5:169659316-169659697				Unknown										381	27	240	14.2	63	169659316	169659697
Cap	4108	chrX	22226458	22226697	239	2.25	chrX:22226272-22226487	RGD1563528	LCP	-	Promoter	578	-294	hypothetical protein LOC503429	NP_001102835		NM_001109365	22226957	22226085	872	215	19	130	17.7	60.5	22226272	22226487
Cap	110	chr1	186684856	186685293	437	2.26	chr1:186684796-186685032				Unknown										236	17	144	14.4	61	186684796	186685032
Cap	116	chr1	196932204	196932543	339	2.26	chr1:196932193-196932529				Unknown										336	27	210	16.1	62.5	196932193	196932529
Cap	38	chr1	78840919	78841261	342	2.26	chr1:78840896-78841259				Unknown										363	34	238	18.7	65.6	78840896	78841259
Cap	560	chr10	12823983	12824318	335	2.26	chr10:12824024-12824260				Unknown										236	21	153	17.8	64.8	12824024	12824260
Cap	1165	chr13	49251487	49251827	340	2.26	chr13:49251476-49251812	LOC498236	LCP	-	Promoter	-4605	-41126	hypothetical protein LOC498236	NP_001041391		NM_001047926	49247039	49210518	36521	336	26	225	15.5	67	49251476	49251812
Cap	2314	chr20	25530862	25531387	525	2.26	chr20:25530984-25531231				Unknown										247	17	148	13.8	59.9	25530984	25531231
Cap	2274	chr20	4175674	4176208	534	2.26	chr20:4175674-4177424	C4a	LCP	+	Intragenic	70385	-139327	complement component 4a	NP_113692	complement protein, part of the classical activation pathway; localizes to the class III region of the MHC [RGD].	NM_031504	4106164	4315876	209712	1750	170	1200	19.4	68.6	4175674	4177424
Cap	3049	chr5	160909725	160910059	334	2.26	chr5:160909767-160910002				Unknown										235	22	146	18.7	62.1	160909767	160910002
Cap	3188	chr5	142490399	142490938	539	2.26	chr5:142490070-142490365	Hpcal4	HCP	+	Promoter	-244	-8141	hippocalcin-like 4	NP_059053	Ca(2+)-binding protein [RGD].	NM_017357	142490461	142498358	7897	295	30	191	20.3	64.7	142490070	142490365
Cap	3319	chr6	137724483	137724922	439	2.27	chr6:137724384-137724712	Mta1	LCP	+	Intragenic	64548	-419434	metastasis associated 1	NP_072110	high expression of this protein correlates with the metastatic potential of cells; may have a role in gene regulation [RGD].	NM_022588	137660000	138143982	483982	328	23	222	14	67.7	137724384	137724712
Cap	3441	chr7	11481116	11481445	329	2.27	chr7:11480919-11481633	Polrmt	ICP	+	Intragenic	6812	-3404	polymerase (RNA) mitochondrial (DNA directed)	NP_001100236		NM_001106766	11474464	11484680	10216	714	58	460	16.2	64.4	11480919	11481633
Cap	4055	chrUn	52654604	52655028	424	2.27	chrUn:52654824-52655032				Unknown										208	17	113	16.3	54.3	52654824	52655032
Cap	2481	chr3	119294554	119294889	335	2.28	chr3:119294450-119296194	Adra1d	HCP	-	Promoter	663	-15349	adrenergic receptor, alpha 1d	NP_077809	adrenergic receptor showing high affinity for the antagonist WB4101 and agonists phenylephrine and methoxamine [RGD]. Publication Note: This RefSeq record includes a subset of the publications that are available for this gene. Please see the Entrez Gene record to access additional publications.	NM_024483	119295985	119279973	16012	1744	158	1162	18.1	66.6	119294450	119296194
Cap	3296	chr6	23742723	23743061	338	2.28	chr6:23742649-23742926	Clip4	LCP	-	Downstream	89640	6382	CAP-GLY domain containing linker protein family,	NP_001013964		NM_001013942	23832427	23749169	83258	277	22	166	15.9	59.9	23742649	23742926
Cap	75	chr1	95887473	95887813	340	2.29	chr1:95887513-95887937	Lhb	LCP	+	Promoter	-5273	-6262	luteinizing hormone beta isoform 1	NP_036990	subunit of luteinizing hormone; involved in spermatogenesis and oogenesis [RGD]. Publication Note: This RefSeq record includes a subset of the publications that are available for this gene. Please see the Entrez Gene record to access additional publications.	NM_012858	95892998	95893987	989	424	42	289	19.8	68.2	95887513	95887937
Cap	996	chr12	2617130	2617474	344	2.29	chr12:2616992-2617397				Unknown										405	30	267	14.8	65.9	2616992	2617397
Cap	1021	chr12	32725096	32725525	429	2.29	chr12:32725041-32725273	Ncor2	LCP	+	Intragenic	162365	-596	nuclear receptor co-repressor 2	NP_001101804		NM_001108334	32562792	32725753	162961	232	16	150	13.8	64.7	32725041	32725273
Cap	1478	chr15	102831544	102831883	339	2.29	chr15:102831563-102831838				Unknown										275	21	173	15.3	62.9	102831563	102831838
Cap	1827	chr18	54649340	54649785	445	2.29	chr18:54649577-54649801				Unknown										224	26	152	23.2	67.9	54649577	54649801
Cap	2309	chr20	20002138	20002575	437	2.29	chr20:20002179-20002410				Unknown										231	19	119	16.5	51.5	20002179	20002410
Cap	2289	chr20	9397813	9398139	326	2.29	chr20:9397862-9398066	Abcg1	HCP	+	Intragenic	7480	-61610	ATP-binding cassette, sub-family G (WHITE),	NP_445954	ATP-binding cassette (ABC) half-transporter that facilitates the efflux of excess cholesterol from macrophages and may play an important role in cholesterol homeostasis [RGD].	NM_053502	9390484	9459574	69090	204	17	118	16.7	57.8	9397862	9398066
Cap	31	chr1	76479673	76480007	334	2.3	chr1:76479587-76480077	Slc8a2	LCP	+	Intragenic	5895	-18792	solute carrier family 8 (sodium/calcium	NP_511174	isoform 2 of sodium/calcium exchanger; regulates intracellular calcium levels and maintains calcium homeostasis; may be important for the control of synaptic plasticity [RGD]. Publication Note: This RefSeq record includes a subset of the publications that are available for this gene. Please see the Entrez Gene record to access additional publications.	NM_078619	76473937	76498624	24687	490	40	310	16.3	63.3	76479587	76480077
Cap	554	chr10	1842766	1843423	657	2.3	chr10:1842964-1843259				Unknown										295	21	185	14.2	62.7	1842964	1843259
Cap	1721	chr17	42246	43359	1113	2.3	chr17:41883-42398	Mrpl36	ICP	-	Promoter	221	-876	mitochondrial ribosomal protein L36	NP_001102349		NM_001108879	42361	41264	1097	515	47	338	18.3	65.6	41883	42398
Cap	2281	chr20	5591586	5591920	334	2.3	chr20:5591600-5591877				Unknown										277	22	153	15.9	55.2	5591600	5591877
Cap	3503	chr7	135137877	135138306	429	2.3	chr7:135137488-135139132				Unknown										1644	170	1069	20.7	65	135137488	135139132
Cap	4049	chrUn	24740747	24741101	354	2.3	chrUn:24740890-24741105	Khsrp	HCP	+	Intragenic	8109	-885	KH-type splicing regulatory protein (FUSE	NP_598286	binds to the microtubule-associated protein 2 (Map2) 3 dendritic targeting element; may play a role in nucleocytoplasmic mRNA targeting [RGD].	NM_133602	24732888	24741882	8994	215	18	148	16.7	68.8	24740890	24741105
Cap	1025	chr12	33842685	33842924	239	2.31	chr12:33842734-33842954				Unknown										220	22	136	20	61.8	33842734	33842954
Cap	1027	chr12	34631461	34631991	530	2.31	chr12:34631471-34632147				Unknown										676	52	420	15.4	62.1	34631471	34632147
Cap	2063	chr2	143859162	143859501	339	2.31	chr2:143859107-143859530				Unknown										423	32	271	15.1	64.1	143859107	143859530
Cap	2760	chr4	76689462	76690076	614	2.31	chr4:76689074-76690057	Zfp775	HCP	+	Promoter	-4517	-22042	zinc finger protein 775	NP_001101329		NM_001107859	76694082	76711607	17525	983	74	632	15.1	64.3	76689074	76690057
Cap	2998	chr5	58919050	58919379	329	2.31	chr5:58917901-58919722				Unknown										1821	155	1122	17	61.6	58917901	58919722
Cap	3027	chr5	148218331	148218575	244	2.31	chr5:148218042-148219007				Unknown										965	97	597	20.1	61.9	148218042	148219007
Cap	3003	chr5	64720012	64720351	339	2.31	chr5:64719911-64720424	Nr4a3	LCP	+	Intragenic	1163	-7292	nuclear receptor subfamily 4, group A, member 3	NP_059048	nuclear orphan receptor; involved in regulating transcription [RGD].	NM_017352	64719004	64727459	8455	513	50	365	19.5	71.2	64719911	64720424
Cap	3031	chr5	151875452	151875686	234	2.31	chr5:151875466-151875746	Sytl1	LCP	+	Downstream	12697	2300	synaptotagmin-like 1	NP_001020822		NM_001025651	151862909	151873306	10397	280	21	175	15	62.5	151875466	151875746
Cap	3686	chr8	48642646	48642985	339	2.31	chr8:48642649-48642922	Dscaml1	ICP	+	Intragenic	236413	-80990	Down syndrome cell adhesion molecule-like 1	NP_001101611		NM_001108141	48406372	48723775	317403	273	20	175	14.7	64.1	48642649	48642922
Cap	578	chr10	37339031	37339370	339	2.32	chr10:37338992-37339195				Unknown										203	16	137	15.8	67.5	37338992	37339195
Cap	2452	chr3	4319309	4319542	233	2.32	chr3:4319245-4319618				Unknown										373	32	241	17.2	64.6	4319245	4319618
Cap	3679	chr8	21085338	21085575	237	2.32	chr8:21085284-21085505				Unknown										221	25	152	22.6	68.8	21085284	21085505
Cap	3906	chr9	105496794	105497253	459	2.32	chr9:105496747-105497144				Unknown										397	31	250	15.6	63	105496747	105497144
Cap	1323	chr14	8030727	8031256	529	2.33	chr14:8030748-8031020				Unknown										272	23	166	16.9	61	8030748	8031020
Cap	1710	chr17	49380214	49380672	458	2.33	chr17:49380280-49380647				Unknown										367	45	276	24.5	75.2	49380280	49380647
Cap	2070	chr2	182058095	182058435	340	2.33	chr2:182058149-182058353				Unknown										204	17	138	16.7	67.6	182058149	182058353
Cap	3064	chr5	168292413	168292742	329	2.33	chr5:168292427-168292642				Unknown										215	17	132	15.8	61.4	168292427	168292642
Cap	3427	chr7	10010392	10010843	451	2.33	chr7:10010449-10011018	Eef2	HCP	-	Downstream	11598	6327	eukaryotic translation elongation factor 2	NP_058941	catalyzes the translocation of peptidyl-tRNA from the ribosomal A site to the P site in translational elongation [RGD]. Publication Note: This RefSeq record includes a subset of the publications that are available for this gene. Please see the Entrez Gene record to access additional publications.	NM_017245	10022331	10017060	5271	569	46	341	16.2	59.9	10010449	10011018
Cap	622	chr10	102388440	102388864	424	2.34	chr10:102388498-102389069				Unknown										571	45	374	15.8	65.5	102388498	102389069
Cap	1033	chr12	39294047	39294476	429	2.34	chr12:39294190-39294407				Unknown										217	18	129	16.6	59.4	39294190	39294407
Cap	1052	chr12	46775108	46775572	464	2.34	chr12:46775008-46775432				Unknown										424	35	254	16.5	59.9	46775008	46775432
Cap	2484	chr3	143037996	143038333	337	2.34	chr3:143037863-143038253	H13	HCP	+	Intragenic	17411	-21508	histocompatibility 13	NP_001101259		NM_001107789	143020647	143059566	38919	390	38	234	19.5	60	143037863	143038253
Cap	3044	chr5	158751669	158752195	526	2.34	chr5:158751807-158752224				Unknown										417	35	262	16.8	62.8	158751807	158752224
Cap	3040	chr5	157116996	157117444	448	2.34	chr5:157117233-157117459	Cda	ICP	-	Downstream	26643	-44	cytidine deaminase	NP_001102158		NM_001108688	157143989	157117302	26687	226	16	126	14.2	55.8	157117233	157117459
Cap	3287	chr6	9675667	9676095	428	2.34	chr6:9675888-9676134	Prkce	HCP	+	Intragenic	44770	-421300	protein kinase C, epsilon	NP_058867	has phospholipid and diacylglycerol-dependent activity; plays a role in ouabain induced Na+/K+-ATPase mediated signal transduction in cardiac myocytes [RGD]. Publication Note: This RefSeq record includes a subset of the publications that are available for this gene. Please see the Entrez Gene record to access additional publications.	NM_017171	9631241	10097311	466070	246	17	137	13.8	55.7	9675888	9676134
Cap	3457	chr7	31410444	31410873	429	2.34	chr7:31410377-31410629				Unknown										252	18	149	14.3	59.1	31410377	31410629
Cap	3467	chr7	112622441	112622775	334	2.34	chr7:112622389-112622616				Unknown										227	19	138	16.7	60.8	112622389	112622616
Cap	3492	chr7	129598114	129598648	534	2.34	chr7:129598157-129598384	Abcd2	ICP	-	Promoter	-6907	-55513	ATP-binding cassette, sub-family D (ALD), member	NP_203503	ATP-binding cassette (ABC) peroxisomal half-transporter that assembles with ALDRP to form a functional heterodimer; mutation in ABCD proteins causes X-linked adrenoleukodystrophy [RGD].	NM_033352	129591363	129542757	48606	227	20	151	17.6	66.5	129598157	129598384
Cap	3468	chr7	113878097	113878526	429	2.34	chr7:113878305-113878586	Naprt1	LCP	-	Degenerate_Promoter	-9715	-13158	nicotinate phosphoribosyltransferase domain	NP_997492	may act as a nicotinate phosphoribosyltransferase in NAD salvage synthesis [RGD].	NM_207609	113868730	113865287	3443	281	24	187	17.1	66.5	113878305	113878586
Cap	3468	chr7	113878097	113878526	429	2.34	chr7:113878305-113878586	Tigd5	HCP	+	Degenerate_Promoter	-7313	-9833	tigger transposable element derived 5	NP_001119740		NM_001126268	113885758	113888278	2520	281	24	187	17.1	66.5	113878305	113878586
Cap	1171	chr13	87460451	87460635	184	2.35	chr13:87460149-87460471	Itln1	LCP	+	Downstream	15192	5088	intelectin 1 (galactofuranose binding)	NP_001030118		NM_001034946	87445118	87455222	10104	322	27	191	16.8	59.3	87460149	87460471
Cap	1803	chr18	6323684	6324115	431	2.35	chr18:6323583-6326436				Unknown										2853	212	1672	14.9	58.6	6323583	6326436
Cap	2749	chr4	6218774	6219108	334	2.35	chr4:6218758-6219103	Kcnh2	HCP	+	Intragenic	26287	-5354	voltage-gated potassium channel, subfamily H,	NP_446401	voltage gated potassium channel pore forming subunit [RGD].	NM_053949	6192643	6224284	31641	345	32	226	18.6	65.5	6218758	6219103
Cap	3007	chr5	127715754	127716089	335	2.35	chr5:127715769-127716046	Ttc22	LCP	+	Intragenic	15785	-1020	tetratricopeptide repeat domain 22	NP_001100141		NM_001106671	127700122	127716927	16805	277	21	172	15.2	62.1	127715769	127716046
Cap	26	chr1	70431729	70432185	456	2.36	chr1:70431801-70432143				Unknown										342	27	220	15.8	64.3	70431801	70432143
Cap	61	chr1	87318558	87318994	436	2.36	chr1:87318753-87319061	Chst8	HCP	-	Promoter	-7371	-166418	carbohydrate (N-acetylgalactosamine 4-0)	NP_001100974		NM_001107504	87311536	87152489	159047	308	22	183	14.3	59.4	87318753	87319061
Cap	120	chr1	201289760	201290194	434	2.36	chr1:201289682-201289966	Pkp3	LCP	+	Downstream	13035	2025	plakophilin 3	NP_001099785		NM_001106315	201276789	201287799	11010	284	23	168	16.2	59.2	201289682	201289966
Cap	607	chr10	91779647	91780084	437	2.36	chr10:91779267-91780287				Unknown										1020	85	686	16.7	67.3	91779267	91780287
Cap	616	chr10	98593406	98594019	613	2.36	chr10:98593403-98593874	Rgs9	ICP	-	Downstream	59242	4687	regulator of G-protein signaling 9	NP_062097	splice variant Rgs9l may act as a GTPase activating protein; inhibits dopamine D2 receptor induced G protein-coupled inward rectifier K+ channel current [RGD]. Publication Note: This RefSeq record includes a subset of the publications that are available for this gene. Please see the Entrez Gene record to access additional publications.	NM_019224	98652880	98598325	54555	471	42	293	17.8	62.2	98593403	98593874
Cap	1026	chr12	34362610	34363041	431	2.36	chr12:34362794-34363122				Unknown										328	26	208	15.9	63.4	34362794	34363122
Cap	1009	chr12	17860397	17860820	423	2.36	chr12:17860165-17860739	Gal3st4	LCP	-	Degenerate_Promoter	-3139	-11897	galactose-3-O-sulfotransferase 4	NP_001102534		NM_001109064	17857313	17848555	8758	574	43	364	15	63.4	17860165	17860739
Cap	1009	chr12	17860397	17860820	423	2.36	chr12:17860165-17860739	Stag3	HCP	+	Degenerate_Promoter	-4820	-36540	stromal antigen 3	NP_446182	testis-specific protein which associates with the synaptonemal complex [RGD].	NM_053730	17865272	17896992	31720	574	43	364	15	63.4	17860165	17860739
Cap	1928	chr19	25811288	25811726	438	2.36	chr19:25811185-25811520	Il27ra	ICP	+	Downstream	15998	4035	interleukin 27 receptor, alpha	NP_001099413		NM_001105943	25795354	25807317	11963	335	41	253	24.5	75.5	25811185	25811520
Cap	2805	chr4	15566058	15566776	718	2.36	chr4:15566132-15567119	Cacna2d1	HCP	-	Promoter	108	-426732	calcium channel, voltage-dependent, alpha2/delta	NP_037051	subunit of voltage-gated calcium channels; contributes to the regulation of N- and/or L-type calcium channels [RGD].	NM_012919	15566733	15139893	426840	987	112	650	22.7	65.9	15566132	15567119
Cap	3071	chr5	172154079	172154503	424	2.36	chr5:172154139-172154512				Unknown										373	28	232	15	62.2	172154139	172154512
Cap	3712	chr8	119386676	119386920	244	2.36	chr8:119386200-119387025				Unknown										825	71	558	17.2	67.6	119386200	119387025
Cap	214	chr1	78887306	78887547	241	2.37	chr1:78887205-78887651	LOC308398	LCP	-	Promoter	-939	-3018	hypothetical protein LOC308398	NP_001100952		NM_001107482	78886489	78884410	2079	446	43	317	19.3	71.1	78887205	78887651
Cap	1043	chr12	44009458	44009787	329	2.37	chr12:44009561-44009849				Unknown										288	21	163	14.6	56.6	44009561	44009849
Cap	2209	chr2	190468986	190469625	639	2.37	chr2:190469005-190469354	Hormad1	ICP	+	Promoter	71	-35600	HORMA domain containing 1	NP_001102419		NM_001108949	190469108	190504779	35671	349	25	191	14.3	54.7	190469005	190469354
Cap	2989	chr5	19120813	19121242	429	2.37	chr5:19120691-19121241				Unknown										550	60	402	21.8	73.1	19120691	19121241
Cap	2986	chr5	1116608	1117037	429	2.37	chr5:1116385-1116944	Jph1	HCP	+	Intragenic	6376	-90428	junctophilin 1	NP_001100100		NM_001106630	1110288	1207092	96804	559	38	329	13.6	58.9	1116385	1116944
Cap	3483	chr7	119937459	119937790	331	2.37	chr7:119936938-119938619				Unknown										1681	144	1014	17.1	60.3	119936938	119938619
Cap	1918	chr19	10123933	10124272	339	2.38	chr19:10123770-10124221				Unknown										451	34	294	15.1	65.2	10123770	10124221
Cap	1939	chr19	40659191	40659420	229	2.38	chr19:40659181-40659931	LOC498951	LCP	-	Downstream	17078	3167	hypothetical protein LOC498951	NP_001020937		NM_001025766	40676634	40662723	13911	750	51	507	13.6	67.6	40659181	40659931
Cap	2059	chr2	123598744	123599483	739	2.38	chr2:123598886-123599284	Adad1	HCP	+	Promoter	-49	-33765	testis nuclear RNA-binding protein	NP_001006978		NM_001006977	123599134	123632850	33716	398	48	288	24.1	72.4	123598886	123599284
Cap	2075	chr2	190469026	190469552	526	2.38	chr2:190469005-190469354	Hormad1	ICP	+	Promoter	71	-35600	HORMA domain containing 1	NP_001102419		NM_001108949	190469108	190504779	35671	349	25	191	14.3	54.7	190469005	190469354
Cap	2077	chr2	193240890	193241134	244	2.38	chr2:193240413-193241630	Hsd3b	LCP	-	Downstream	28958	8927	hydroxy-delta-5-steroid dehydrogenase, 3 beta-	NP_036716	catalyzes the conversion of delta 5-3 beta-hydroxysteroids to delta 4-3-ketosteroids in steroid hormone biosynthesis [RGD].	NM_012584	193269979	193249948	20031	1217	123	790	20.2	64.9	193240413	193241630
Cap	2485	chr3	143905075	143905309	234	2.38	chr3:143904383-143905642				Unknown										1259	103	631	16.4	50.1	143904383	143905642
Cap	2505	chr3	160025456	160025980	524	2.38	chr3:160025637-160025954				Unknown										317	34	209	21.5	65.9	160025637	160025954
Cap	3292	chr6	11747488	11747922	434	2.38	chr6:11747700-11747966				Unknown										266	22	170	16.5	63.9	11747700	11747966
Cap	2312	chr20	21493387	21493822	435	2.39	chr20:21493611-21493859	Zfp365	LCP	+	Intragenic	3208	-21108	zinc finger protein 365	NP_001020316		NM_001025145	21490527	21514843	24316	248	20	141	16.1	56.9	21493611	21493859
Cap	2476	chr3	105811833	105812171	338	2.39	chr3:105811886-105812100	Vps18	ICP	+	Intragenic	6672	-4540	vacuolar protein sorting 18	NP_001099969		NM_001106499	105805321	105816533	11212	214	17	129	15.9	60.3	105811886	105812100
Cap	3034	chr5	155036425	155036755	330	2.39	chr5:155036466-155036696	Zfp46	LCP	+	Intragenic	706	-3795	zinc finger protein 46	NP_001100161		NM_001106691	155035875	155040376	4501	230	19	142	16.5	61.7	155036466	155036696
Cap	3511	chr7	138519350	138519784	434	2.39	chr7:138519508-138519886	Lass5	ICP	-	Promoter	-6050	-44547	LAG1 homolog, ceramide synthase 5	NP_001102463		NM_001108993	138513647	138475150	38497	378	32	231	16.9	61.1	138519508	138519886
Cap	3473	chr7	114327182	114327701	519	2.39	chr7:114327212-114327456	RGD1565316	LCP	+	Downstream	28271	4592	hypothetical protein LOC315091	NP_001108498		NM_001115026	114299063	114322742	23679	244	21	159	17.2	65.2	114327212	114327456
Cap	57	chr1	85313609	85314298	689	2.4	chr1:85313348-85313599				Unknown										251	19	177	15.1	70.5	85313348	85313599
Cap	57	chr1	85313609	85314298	689	2.4	chr1:85313978-85314254	Lrfn3	ICP	-	Promoter	279	-5200	leucine rich repeat and fibronectin type III	NP_001100972		NM_001107502	85314395	85308916	5479	276	25	174	18.1	63	85313978	85314254
Cap	119	chr1	201267861	201268095	234	2.4	chr1:201267599-201267801	Pkp3	LCP	+	Promoter	-9089	-20099	plakophilin 3	NP_001099785		NM_001106315	201276789	201287799	11010	202	20	129	19.8	63.9	201267599	201267801
Cap	567	chr10	15384383	15385003	620	2.4	chr10:15384376-15385244	Tmem8	HCP	+	Promoter	163	-9310	transmembrane protein 8 (five membrane-spanning	NP_001100461		NM_001106991	15384647	15394120	9473	868	70	511	16.1	58.9	15384376	15385244
Cap	1004	chr12	12077290	12077749	459	2.4	chr12:12077492-12077786				Unknown										294	22	188	15	63.9	12077492	12077786
Cap	2315	chr20	28660125	28660554	429	2.4	chr20:28660371-28660577	Prf1	LCP	+	Intragenic	2108	-3396	perforin 1 (pore forming protein)	NP_059026	cytolytic factor present in cytoplasmic granules [RGD].	NM_017330	28658366	28663870	5504	206	18	126	17.5	61.2	28660371	28660577
Cap	3041	chr5	157531717	157532049	332	2.4	chr5:157531737-157531999	Pla2g2c	LCP	+	Promoter	-4677	-24027	phospholipase A2, group IIC	NP_062075	catalyzes Ca+2 dependent hydrolysis of phospholipids including hydrolysis of L-alpha-1-stearoyl-2-arachidonyl phosphatidylinositol [RGD].	NM_019202	157536545	157555895	19350	262	19	168	14.5	64.1	157531737	157531999
Cap	3307	chr6	104732161	104732455	294	2.4	chr6:104732207-104732416	Sfrs5	HCP	+	Intragenic	4026	-671	splicing factor, arginine/serine-rich 5	NP_062130	may act as a regulator of alternative pre-mRNA splicing; may play a role in cell cycle regulation [RGD].	NM_019257	104728285	104732982	4697	209	16	122	15.3	58.4	104732207	104732416
Cap	3723	chr8	125064515	125064859	344	2.4	chr8:125064401-125064984				Unknown										583	40	355	13.7	60.9	125064401	125064984
Cap	3705	chr8	114757859	114758296	437	2.4	chr8:114757574-114758295	Scap	HCP	+	Intragenic	51456	-3407	SREBF chaperone	NP_001094436		NM_001100966	114706478	114761341	54863	721	49	454	13.6	63	114757574	114758295
Cap	105	chr1	163766071	163766429	358	2.41	chr1:163766005-163766281				Unknown										276	29	196	21	71	163766005	163766281
Cap	88	chr1	128588810	128589334	524	2.41	chr1:128588875-128589240	Rgma	HCP	+	Intragenic	41659	-2247	RGM domain family, member A	NP_001100994		NM_001107524	128547398	128591304	43906	365	28	229	15.3	62.7	128588875	128589240
Cap	114	chr1	187294624	187295143	519	2.41	chr1:187294613-187295129	Trim72	LCP	+	Intragenic	6770	-1090	tripartite motif-containing 72	NP_001071143		NM_001077675	187288101	187295961	7860	516	41	330	15.9	64	187294613	187295129
Cap	1461	chr15	5714344	5714888	544	2.41	chr15:5714307-5714891	Cd99l2	ICP	+	Intragenic	40936	-4559	Cd99 antigen-like 2	NP_604454	enriched in respiration-related neurons; may play a role in detection of chemicals in cerebrospinal fluid [RGD].	NM_134459	5673663	5719158	45495	584	50	382	17.1	65.4	5714307	5714891
Cap	1579	chr16	19580230	19580700	470	2.41	chr16:19580134-19581638	Gdf1	LCP	-	Downstream	8093	-75	growth differentiation factor 1	NP_001037705		NM_001044240	19588979	19580811	8168	1504	125	942	16.6	62.6	19580134	19581638
Cap	1712	chr17	73144098	73144617	519	2.41	chr17:73144303-73144577				Unknown										274	18	157	13.1	57.3	73144303	73144577
Cap	1819	chr18	29736236	29736470	234	2.41	chr18:29735751-29736440	Pcdha12	ICP	+	Intragenic	1583	-191935	protocadherin alpha 12	NP_446392	member of the cadherin superfamily of cell adhesion molecules; may play a role in spermatogenesis [RGD].	NM_053940	29734512	29928030	193518	689	54	423	15.7	61.4	29735751	29736440
Cap	2513	chr3	164685548	164686068	520	2.41	chr3:164685635-164685955				Unknown										320	25	213	15.6	66.6	164685635	164685955
Cap	910	chr11	84755454	84756082	628	2.42	chr11:84755441-84755977	Zdhhc8	HCP	+	Intragenic	6771	-6588	zinc finger, DHHC domain containing 8	NP_001034110		NM_001039021	84748938	84762297	13359	536	40	347	14.9	64.7	84755441	84755977
Cap	2444	chr2_random	2551724	2551969	245	2.42	chr2_random:2551437-2554211				Unknown										2774	195	1581	14.1	57	2551437	2554211
Cap	2303	chr20	14321528	14322060	532	2.42	chr20:14321545-14321817				Unknown										272	20	146	14.7	53.7	14321545	14321817
Cap	2483	chr3	142326554	142326988	434	2.42	chr3:142326266-142327268				Unknown										1002	65	632	13	63.1	142326266	142327268
Cap	2754	chr4	58718127	58718556	429	2.42	chr4:58718081-58718302				Unknown										221	16	121	14.5	54.8	58718081	58718302
Cap	3609	chr7	117603708	117604406	698	2.42	chr7:117603123-117603800	Kcnj4	ICP	-	Promoter	366	-1738	potassium inwardly-rectifying channel J4	NP_446322	inwardly-rectifying potassium channel [RGD].	NM_053870	117603827	117601723	2104	677	59	420	17.4	62	117603123	117603800
Cap	51	chr1	83918836	83919075	239	2.43	chr1:83918827-83919695				Unknown										868	66	456	15.2	52.5	83918827	83919695
Cap	265	chr1	85878947	85879411	464	2.43	chr1:85879059-85879357	Ffar2	LCP	-	Promoter	236	-756	free fatty acid receptor 2	NP_001005877		NM_001005877	85879444	85878452	992	298	22	183	14.8	61.4	85879059	85879357
Cap	2065	chr2	153139045	153139479	434	2.43	chr2:153139087-153139335				Unknown										248	23	164	18.5	66.1	153139087	153139335
Cap	2472	chr3	76876959	76877414	455	2.43	chr3:76876900-76877144				Unknown										244	17	133	13.9	54.5	76876900	76877144
Cap	2767	chr4	94627675	94628284	609	2.43	chr4:94627780-94628060				Unknown										280	22	198	15.7	70.7	94627780	94628060
Cap	3022	chr5	146438384	146438718	334	2.43	chr5:146438523-146438734				Unknown										211	15	137	14.2	64.9	146438523	146438734
Cap	3052	chr5	165339955	165340391	436	2.43	chr5:165339987-165340239				Unknown										252	19	149	15.1	59.1	165339987	165340239
Cap	3491	chr7	129282163	129282902	739	2.43	chr7:129282355-129282669				Unknown										314	22	181	14	57.6	129282355	129282669
Cap	3708	chr8	115412814	115413393	579	2.43	chr8:115413043-115413266	Ltf	LCP	+	Promoter	-4609	-27455	lactotransferrin	NP_001100334		NM_001106864	115417763	115440609	22846	223	23	146	20.6	65.5	115413043	115413266
Cap	3895	chr9	58928325	58928952	627	2.43	chr9:58928535-58928812	Cyp20a1	HCP	+	Intragenic	21171	-44613	cytochrome P450, family 20, subfamily A,	NP_955433	may act as an electron transporter [RGD].	NM_199401	58907502	58973286	65784	277	20	152	14.4	54.9	58928535	58928812
Cap	1961	chr19	57213530	57214149	619	2.44	chr19:57213666-57213897	Pard3	HCP	+	Intragenic	198040	-389352	partitioning-defective protein 3 homolog	NP_112514	may mediate the establishment and maintenance of epithelial cell polarity [RGD].	NM_031235	57015741	57603133	587392	231	17	129	14.7	55.8	57213666	57213897
Cap	2273	chr20	4168837	4169361	524	2.44	chr20:4168869-4169496	C4a	LCP	+	Intragenic	63018	-146694	complement component 4a	NP_113692	complement protein, part of the classical activation pathway; localizes to the class III region of the MHC [RGD].	NM_031504	4106164	4315876	209712	627	53	433	16.9	69.1	4168869	4169496
Cap	2272	chr20	3063191	3063621	430	2.44	chr20:3063258-3063819	Tubb5	HCP	+	Intragenic	3274	-1247	tubulin, beta 5	NP_775125	beta 5-tubulin; polymerizes to form microtubules; member of a family of structural proteins [RGD].	NM_173102	3060264	3064785	4521	561	38	329	13.5	58.6	3063258	3063819
Cap	3497	chr7	133032406	133032935	529	2.44	chr7:133032522-133032989				Unknown										467	37	272	15.8	58.2	133032522	133032989
Cap	4087	chrX	89770406	89770738	332	2.44	chrX:89770396-89771413	Ogt	ICP	+	Downstream	49536	4686	O-linked N-acetylglucosamine transferase	NP_058803	the catalytic p110 subunit of the enzyme involved in the dynamic O-GlcNAcylation of nuclear and cytosolic proteins [RGD]. Sequence Note: The sequence U76557.1 is from a chimeric clone. Only the O-linked N-acetylglucosamine transferase sequence region was propagated into this RefSeq record. Publication Note: This RefSeq record includes a subset of the publications that are available for this gene.…	NM_017107	89721368	89766218	44850	1017	105	677	20.6	66.6	89770396	89771413
Cap	629	chr10	106211656	106212175	519	2.45	chr10:106211682-106211936				Unknown										254	18	164	14.2	64.6	106211682	106211936
Cap	1809	chr18	29466223	29466742	519	2.45	chr18:29466312-29466639	Dnd1	HCP	-	Degenerate_Downstream	16562	1172	dead end homolog 1	NP_001020585		NM_001025414	29483037	29467647	15390	327	31	200	19	61.2	29466312	29466639
Cap	1809	chr18	29466223	29466742	519	2.45	chr18:29466312-29466639	Wdr55	ICP	+	Degenerate_Downstream	5156	1644	WD repeat domain 55	NP_001017932		NM_001017932	29461319	29464831	3512	327	31	200	19	61.2	29466312	29466639
Cap	2310	chr20	20073572	20074126	554	2.45	chr20:20073711-20073935				Unknown										224	16	116	14.3	51.8	20073711	20073935
Cap	2480	chr3	118849764	118850100	336	2.45	chr3:118849671-118850169	Hspa12b	LCP	+	Intragenic	16886	-1496	heat shock protein 12B	NP_001101248		NM_001107778	118833034	118851416	18382	498	43	326	17.3	65.5	118849671	118850169
Cap	2512	chr3	164017252	164017488	236	2.45	chr3:164017405-164017787	Pck1	LCP	+	Intragenic	5187	-762	phosphoenolpyruvate carboxykinase 1	NP_942075		NM_198780	164012409	164018358	5949	382	26	219	13.6	57.3	164017405	164017787
Cap	3304	chr6	95463361	95463702	341	2.45	chr6:95463364-95463634				Unknown										270	23	184	17	68.1	95463364	95463634
Cap	3498	chr7	133037487	133037911	424	2.45	chr7:133037584-133037993				Unknown										409	31	235	15.2	57.5	133037584	133037993
Cap	135	chr1	241298258	241298777	519	2.46	chr1:241298403-241298608				Unknown										205	15	124	14.6	60.5	241298403	241298608
Cap	913	chr11	85168678	85169012	334	2.46	chr11:85168551-85168918				Unknown										367	31	245	16.9	66.8	85168551	85168918
Cap	1012	chr12	22079819	22080248	429	2.46	chr12:22079762-22080003	Tmem120a	ICP	+	Downstream	10069	1406	transmembrane protein induced by tumor necrosis	NP_001010945		NM_001010945	22069813	22078476	8663	241	20	158	16.6	65.6	22079762	22080003
Cap	2451	chr3	4239119	4239633	514	2.46	chr3:4239355-4239562				Unknown										207	20	130	19.3	62.8	4239355	4239562
Cap	3060	chr5	168159654	168159892	238	2.46	chr5:168159855-168160133				Unknown										278	22	164	15.8	59	168159855	168160133
Cap	3000	chr5	60117225	60117841	616	2.46	chr5:60117468-60117673	Npr2	LCP	+	Intragenic	10008	-10388	natriuretic peptide receptor 2	NP_446290	receptor for atrial natriuretic peptide, brain natriuretic peptide and atriopeptin; has guanylate cyclase activity [RGD].	NM_053838	60107562	60127958	20396	205	16	123	15.6	60	60117468	60117673
Cap	3051	chr5	162293746	162294070	324	2.46	chr5:162293574-162294158	Pramel1	LCP	+	Promoter	-2671	-6320	preferentially expressed antigen in	NP_001103087		NM_001109617	162296537	162300186	3649	584	40	333	13.7	57	162293574	162294158
Cap	3901	chr9	90580359	90580693	334	2.46	chr9:90580364-90580663				Unknown										299	24	190	16.1	63.5	90580364	90580663
Cap	1835	chr18	77041122	77041447	325	2.47	chr18:77041084-77041480	Adnp2	ICP	-	Promoter	288	-23781	ADNP homeobox 2	NP_001120845		NM_001127373	77041570	77017501	24069	396	54	254	27.3	64.1	77041084	77041480
Cap	2053	chr2	82237538	82237812	274	2.47	chr2:82237514-82238637				Unknown										1123	132	748	23.5	66.6	82237514	82238637
Cap	2500	chr3	158735533	158736059	526	2.47	chr3:158735410-158735957	Ube2v1	HCP	-	Downstream	33042	10189	ubiquitin-conjugating enzyme E2 variant 1	NP_001103815		NM_001110345	158768725	158745872	22853	547	43	386	15.7	70.6	158735410	158735957
Cap	89	chr1	128843900	128844494	594	2.48	chr1:128844014-128844237				Unknown										223	25	156	22.4	70	128844014	128844237
Cap	1302	chr13	103082432	103083142	710	2.48	chr13:103083131-103083461	RGD1309586	HCP	+	Promoter	139	-3031	hypothetical protein LOC364073	NP_001102328		NM_001108858	103083157	103086327	3170	330	31	201	18.8	60.9	103083131	103083461
Cap	2994	chr5	25531205	25531644	439	2.48	chr5:25531288-25531631				Unknown										343	29	221	16.9	64.4	25531288	25531631
Cap	3008	chr5	128230757	128231089	332	2.48	chr5:128230645-128230990				Unknown										345	28	210	16.2	60.9	128230645	128230990
Cap	3313	chr6	129898720	129899362	642	2.48	chr6:129898955-129899184	Ak7	LCP	+	Intragenic	37494	-34849	adenylate kinase 7	NP_001101525		NM_001108055	129861575	129933918	72343	229	16	128	14	55.9	129898955	129899184
Cap	82	chr1	107158420	107158986	566	2.49	chr1:107158432-107158754				Unknown										322	34	235	21.1	73	107158432	107158754
Cap	138	chr1	249249658	249250087	429	2.49	chr1:249249654-249249919	Cpn1	ICP	+	Intragenic	5345	-7923	carboxypeptidase N, polypeptide 1	NP_445978	cleaves carboxy-terminal lysine residues from biologically active peptides [RGD].	NM_053526	249244441	249257709	13268	265	22	155	16.6	58.5	249249654	249249919
Cap	139	chr1	249895324	249895852	528	2.49	chr1:249895134-249896171	Pax2	HCP	+	Downstream	91598	346	paired box gene 2	NP_001099831		NM_001106361	249804054	249895306	91252	1037	81	698	15.6	67.3	249895134	249896171
Cap	613	chr10	95410182	95410611	429	2.49	chr10:95410427-95410628	Kcnh6	ICP	+	Intragenic	9666	-11151	potassium voltage-gated channel, subfamily H,	NP_446389	potassium channel; expressed exclusively in the nervous system [RGD].	NM_053937	95400861	95421678	20817	201	17	114	16.9	56.7	95410427	95410628
Cap	1836	chr18	77110640	77111179	539	2.49	chr18:77110860-77111115	RGD1560212	HCP	+	Intragenic	5240	-1151	hypothetical protein LOC498890	NP_001071144		NM_001077676	77105747	77112138	6391	255	20	156	15.7	61.2	77110860	77111115
Cap	2511	chr3	161526680	161527195	515	2.49	chr3:161526729-161526933				Unknown										204	18	121	17.6	59.3	161526729	161526933
Cap	3063	chr5	168234151	168234675	524	2.49	chr5:168234160-168234400				Unknown										240	19	126	15.8	52.5	168234160	168234400
Cap	3299	chr6	41569736	41570170	434	2.49	chr6:41569878-41570102	Hpcal1	HCP	+	Intragenic	111929	-6781	hippocalcin-like 1	NP_059052	plays a role in neuronal calcium sensing [RGD].	NM_017356	41458061	41576771	118710	224	18	133	16.1	59.4	41569878	41570102
Cap	3321	chr6	137910433	137910674	241	2.49	chr6:137910185-137910415	Mta1	LCP	+	Intragenic	250300	-233682	metastasis associated 1	NP_072110	high expression of this protein correlates with the metastatic potential of cells; may have a role in gene regulation [RGD].	NM_022588	137660000	138143982	483982	230	19	153	16.5	66.5	137910185	137910415
Cap	3724	chr8	125627273	125627604	331	2.49	chr8:125627307-125627545				Unknown										238	19	149	16	62.6	125627307	125627545
Cap	96	chr1	138339194	138339613	419	2.5	chr1:138339394-138339678				Unknown										284	19	190	13.4	66.9	138339394	138339678
Cap	912	chr11	85165258	85165680	422	2.5	chr11:85164965-85165765				Unknown										800	89	529	22.2	66.1	85164965	85165765
Cap	1336	chr14	34951681	34952116	435	2.5	chr14:34951802-34952064				Unknown										262	22	141	16.8	53.8	34951802	34952064
Cap	1838	chr18	77512800	77513319	519	2.5	chr18:77512831-77513266				Unknown										435	28	235	12.9	54	77512831	77513266
Cap	2294	chr20	12337365	12337599	234	2.5	chr20:12337083-12337387				Unknown										304	22	176	14.5	57.9	12337083	12337387
Cap	2482	chr3	141545444	141546003	559	2.51	chr3:141545650-141545923	Gins1	ICP	+	Intragenic	10600	-7144	GINS complex subunit 1 (Psf1 homolog)	NP_001102677		NM_001109207	141535186	141552930	17744	273	21	159	15.4	58.2	141545650	141545923
Cap	3012	chr5	137442996	137443230	234	2.51	chr5:137443163-137443511				Unknown										348	24	215	13.8	61.8	137443163	137443511
Cap	16	chr1	35078307	35078646	339	2.52	chr1:35078299-35078632	Akap12	ICP	+	Downstream	35906	9703	A kinase anchor protein 12 isoform beta	NP_001028825		NM_001033653	35042559	35068762	26203	333	23	212	13.8	63.7	35078299	35078632
Cap	566	chr10	15093060	15093803	743	2.52	chr10:15093265-15093551	RGD1307381	LCP	+	Promoter	-956	-3856	hypothetical protein LOC360498	NP_001014138		NM_001014116	15094364	15097264	2900	286	21	171	14.7	59.8	15093265	15093551
Cap	909	chr11	84367827	84368446	619	2.52	chr11:84367952-84368206	Gp1bb	ICP	+	Promoter	-1715	-2892	platelet glycoprotein Ib beta	NP_446382	forms GP1b, a receptor for von Willebrand factor, when linked by a disulfide bond to platelet glycoprotein GP1alpha; may be involved in platelet aggregation [RGD].	NM_053930	84369794	84370971	1177	254	21	162	16.5	63.8	84367952	84368206
Cap	1016	chr12	27698478	27698996	518	2.52	chr12:27698703-27698938	Asl	ICP	+	Promoter	-4061	-21410	argininosuccinate lyase	NP_067588		NM_021577	27702881	27720230	17349	235	16	120	13.6	51.1	27698703	27698938
Cap	1010	chr12	21557518	21557954	436	2.52	chr12:21557242-21557922	Sh2b2	HCP	+	Intragenic	13149	-14649	SH2B adaptor protein 2	NP_446121	plays a role in Trk mediated signalling during neurogenesis [RGD].	NM_053669	21544433	21572231	27798	680	59	439	17.4	64.6	21557242	21557922
Cap	1477	chr15	80633738	80634197	459	2.52	chr15:80633854-80634125				Unknown										271	18	145	13.3	53.5	80633854	80634125
Cap	1929	chr19	25815554	25816085	531	2.52	chr19:25815782-25816021	RGD1310262	ICP	+	Promoter	-10116	-12078	hypothetical protein LOC304650	NP_001100631		NM_001107161	25826017	25827979	1962	239	19	164	15.9	68.6	25815782	25816021
Cap	3016	chr5	139863616	139864256	640	2.52	chr5:139863762-139863963				Unknown										201	16	111	15.9	55.2	139863762	139863963
Cap	80	chr1	96966739	96967258	519	2.53	chr1:96966846-96967088	Kcnc1	HCP	+	Intragenic	38693	-3095	Shaw-related voltage-gated potassium channel	NP_036988	voltage gated potassium channel; functions as a delayed rectifier K+ channel [RGD].	NM_012856	96928274	96970062	41788	242	22	159	18.2	65.7	96966846	96967088
Cap	1822	chr18	30298209	30298628	419	2.53	chr18:30298298-30298672				Unknown										374	28	239	15	63.9	30298298	30298672
Cap	9	chr1	15204561	15205217	656	2.54	chr1:15204369-15205859				Unknown										1490	167	1021	22.4	68.5	15204369	15205859
Cap	1338	chr14	46691537	46691871	334	2.54	chr14:46691482-46691706				Unknown										224	17	131	15.2	58.5	46691482	46691706
Cap	3429	chr7	10119018	10119640	622	2.54	chr7:10119117-10119427	Creb3l3	LCP	+	Downstream	12748	4315	cAMP responsive element binding protein 3-like	NP_001012115		NM_001012115	10106524	10114957	8433	310	25	198	16.1	63.9	10119117	10119427
Cap	890	chr11	32718252	32718580	328	2.55	chr11:32718336-32718659				Unknown										323	29	183	18	56.7	32718336	32718659
Cap	888	chr11	11371711	11372143	432	2.55	chr11:11371625-11371919	Robo1	LCP	+	Intragenic	586826	-348873	roundabout homolog 1	NP_071524	putative axon guidance receptor [RGD].	NM_022188	10784946	11720645	935699	294	21	152	14.3	51.7	11371625	11371919
Cap	1458	chr15	2678178	2678521	343	2.55	chr15:2678109-2678565	Dupd1	LCP	+	Intragenic	29636	-10636	dual specificity phosphatase and pro isomerase	NP_001101838		NM_001108368	2648701	2688973	40272	456	47	301	20.6	66	2678109	2678565
Cap	2051	chr2	78234505	78234744	239	2.55	chr2:78234200-78234548				Unknown										348	26	198	14.9	56.9	78234200	78234548
Cap	2227	chr2	200709465	200709724	259	2.55	chr2:200708874-200710148	Kcnd3	HCP	+	Promoter	-266	-215053	potassium voltage gated channel, Shal-related	NP_113927	voltage-gated K+ channel that generates an A type K+ current [RGD]. Publication Note: This RefSeq record includes a subset of the publications that are available for this gene. Please see the Entrez Gene record to access additional publications.	NM_031739	200709777	200924564	214787	1274	129	857	20.3	67.3	200708874	200710148
Cap	2453	chr3	4639141	4639664	523	2.55	chr3:4639287-4639489				Unknown										202	16	142	15.8	70.3	4639287	4639489
Cap	2471	chr3	67868197	67868723	526	2.55	chr3:67868344-67868546	Ctnnd1	ICP	-	Promoter	-8158	-58843	catenin (cadherin associated protein), delta 1	NP_001101210		NM_001107740	67860287	67809602	50685	202	23	135	22.8	66.8	67868344	67868546
Cap	2768	chr4	96484321	96484935	614	2.55	chr4:96484122-96484963				Unknown										841	94	589	22.4	70	96484122	96484963
Cap	3054	chr5	165978898	165979132	234	2.55	chr5:165978509-165980029				Unknown										1520	149	880	19.6	57.9	165978509	165980029
Cap	3423	chr7	1858156	1858587	431	2.55	chr7:1858083-1858355	Pa2g4	HCP	-	Promoter	-4123	-11591	ErbB3-binding protein 1	NP_001004206	human and mouse homologs may be involved in coordinating ribosome biosynthesis and cell proliferation [RGD].	NM_001004206	1854096	1846628	7468	272	20	168	14.7	61.8	1858083	1858355
Cap	3438	chr7	11160702	11161421	719	2.55	chr7:11160510-11161412	Sbno2	HCP	+	Intragenic	43127	-902	strawberry notch homolog 2	NP_001101538		NM_001108068	11117834	11161863	44029	902	62	587	13.7	65.1	11160510	11161412
Cap	49	chr1	83571632	83572257	625	2.56	chr1:83571440-83572341	Lrfn1	LCP	+	Promoter	611	-8753	leucine rich repeat and fibronectin type III	NP_001121166		NM_001127694	83571279	83580643	9364	901	57	558	12.7	61.9	83571440	83572341
Cap	606	chr10	91583956	91584581	625	2.56	chr10:91584151-91584453				Unknown										302	24	180	15.9	59.6	91584151	91584453
Cap	1024	chr12	33110257	33110868	611	2.56	chr12:33110395-33110613				Unknown										218	19	126	17.4	57.8	33110395	33110613
Cap	2064	chr2	144405931	144406710	779	2.56	chr2:144405811-144406164	Sohlh2	ICP	+	Promoter	-60	-22514	spermatogenesis and oogenesis specific basic	NP_001030133		NM_001034961	144406047	144428501	22454	353	25	228	14.2	64.6	144405811	144406164
Cap	2064	chr2	144405931	144406710	779	2.56	chr2:144406394-144406676	Sohlh2	ICP	+	Promoter	488	-21966	spermatogenesis and oogenesis specific basic	NP_001030133		NM_001034961	144406047	144428501	22454	282	21	158	14.9	56	144406394	144406676
Cap	2271	chr20	16729	17174	445	2.56	chr20:16620-16942	Tmlhe	HCP	+	Intragenic	8159	-39343	trimethyllysine hydroxylase, epsilon	NP_596878	first enzyme in the carnitine biosynthesis pathway; plays an important role in the transport of fatty acids across the inner mitochondrial membrane [RGD].	NM_133387	8622	56124	47502	322	29	217	18	67.4	16620	16942
Cap	3603	chr7	116806938	116808167	1229	2.56	chr7:116807984-116808190	Cdc42ep1	LCP	+	Promoter	326	-3276	CDC42 effector protein (Rho GTPase binding) 1	NP_001073168		NM_001079700	116807761	116811363	3602	206	21	139	20.4	67.5	116807984	116808190
Cap	3424	chr7	9831105	9831570	465	2.56	chr7:9831091-9831435	LOC690617	LCP	+	Intragenic	1058	-705	hypothetical protein LOC690617	NP_001103075		NM_001109605	9830205	9831968	1763	344	29	225	16.9	65.4	9831091	9831435
Cap	145	chr1	263890104	263890535	431	2.57	chr1:263890316-263890591				Unknown										275	23	154	16.7	56	263890316	263890591
Cap	579	chr10	37382335	37383043	708	2.57	chr10:37381284-37383438	Phf15	LCP	-	Promoter	-2430	-43905	PHD finger protein 15	NP_001100468		NM_001106998	37379931	37338456	41475	2154	152	1269	14.1	58.9	37381284	37383438
Cap	1330	chr14	13632878	13633442	564	2.57	chr14:13632998-13633457	LOC289482	ICP	+	Promoter	173	-9863	ARD1 homolog B	NP_001019913		NM_001024742	13633054	13643090	10036	459	38	297	16.6	64.7	13632998	13633457
Cap	1479	chr15	103532983	103533507	524	2.57	chr15:103533211-103533454				Unknown										243	19	141	15.6	58	103533211	103533454
Cap	1571	chr16	7856126	7856653	527	2.57	chr16:7856146-7856412	Ogdhl	LCP	+	Intragenic	19082	-3159	oxoglutarate dehydrogenase-like	NP_001099532		NM_001106062	7837197	7859438	22241	266	20	174	15	65.4	7856146	7856412
Cap	1706	chr17	23982982	23983401	419	2.57	chr17:23983105-23983349	Kif13a	HCP	+	Intragenic	164144	-24730	kinesin family member 13A	NP_001100932		NM_001107462	23819083	24007957	188874	244	17	144	13.9	59	23983105	23983349
Cap	1792	chr18	155273	155792	519	2.57	chr18:155494-155739	F8	LCP	+	Intragenic	34483	-6392	coagulation factor VIII	NP_899160	human homolog is a cofactor for factor IXa; involved in blood coagulation [RGD].	NM_183331	121133	162008	40875	245	24	163	19.6	66.5	155494	155739
Cap	1923	chr19	20599510	20599944	434	2.57	chr19:20599394-20599745	Zfp423	ICP	+	Intragenic	160561	-139667	zinc finger protein 423	NP_446035	zinc finger protein that interacts with the Olf-1/EBF transcription factor; plays a role in regulation of differentiation of olfactory neurons [RGD].	NM_053583	20439008	20739236	300228	351	26	212	14.8	60.4	20599394	20599745
Cap	2068	chr2	181250014	181250734	720	2.57	chr2:181250234-181250489	Clk2	LCP	+	Intragenic	818	-7002	CDC-like kinase 2	NP_001014276		NM_001014254	181249543	181257363	7820	255	19	171	14.9	67.1	181250234	181250489
Cap	2073	chr2	189858398	189859018	620	2.57	chr2:189858544-189858752	Rfx5	HCP	+	Intragenic	3211	-4305	regulatory factor X, 5 (influences HLA class II	NP_001101164		NM_001107694	189855437	189862953	7516	208	17	136	16.3	65.4	189858544	189858752
Cap	2283	chr20	6198679	6199210	531	2.57	chr20:6198708-6198970	Anks1	HCP	+	Intragenic	77532	-75983	ankyrin repeat and SAM domain containing 1	NP_001101083		NM_001107613	6121307	6274822	153515	262	24	165	18.3	63	6198708	6198970
Cap	2277	chr20	4970911	4971156	245	2.57	chr20:4971117-4971392	Ring1	HCP	+	Intragenic	3004	-892	ring finger protein 1	NP_997714	maps within the major histocompatibility complex RT1 region [RGD].	NM_212549	4968250	4972146	3896	275	30	161	21.8	58.5	4971117	4971392
Cap	2465	chr3	39103593	39104123	530	2.57	chr3:39103648-39103851	Gpd2	HCP	+	Intragenic	123116	-10739	glycerol-3-phosphate dehydrogenase 2	NP_036868	FAD-linked glycerol-3-phosphate dehydrogenase; expression in liver is induced by thyroid hormone [RGD].	NM_012736	38980633	39114488	133855	203	18	110	17.7	54.2	39103648	39103851
Cap	3700	chr8	111844996	111845515	519	2.57	chr8:111845133-111845348	Tex264	HCP	-	Downstream	34451	7553	testis expressed gene 264	NP_001007666		NM_001007665	111879691	111852793	26898	215	19	144	17.7	67	111845133	111845348
Cap	4092	chrX	134848332	134848667	335	2.57	chrX:134848581-134848960				Unknown										379	28	256	14.8	67.5	134848581	134848960
Cap	628	chr10	106073529	106073784	255	2.58	chr10:106073267-106073552	Itgb4	HCP	+	Promoter	-7042	-43223	integrin beta 4	NP_037312	beta subunit of integrin alpha6/beta4 which is a cell surface receptor for laminin; involved in hemidesmosome formation [RGD].	NM_013180	106080451	106116632	36181	285	29	213	20.4	74.7	106073267	106073552
Cap	587	chr10	53793445	53793770	325	2.58	chr10:53793436-53793754	Myh3	LCP	+	Intragenic	16738	-7082	myosin, heavy polypeptide 3	NP_036736	heavy chain of myosin; involved in muscle contraction [RGD].	NM_012604	53776857	53800677	23820	318	27	204	17	64.2	53793436	53793754
Cap	1031	chr12	36360405	36360925	520	2.58	chr12:36360448-36360665				Unknown										217	18	140	16.6	64.5	36360448	36360665
Cap	1471	chr15	33176560	33177088	528	2.58	chr15:33176668-33176962				Unknown										294	20	184	13.6	62.6	33176668	33176962
Cap	1591	chr16	61109628	61109964	336	2.58	chr16:61109682-61109890				Unknown										208	18	138	17.3	66.3	61109682	61109890
Cap	1574	chr16	18632542	18633071	529	2.58	chr16:18632475-18633116	Mrpl34	ICP	+	Promoter	-3348	-4083	mitochondrial ribosomal protein L34	NP_001006966		NM_001006965	18636143	18636878	735	641	57	421	17.8	65.7	18632475	18633116
Cap	3439	chr7	11353182	11353701	519	2.58	chr7:11353393-11353651	Prg-2	HCP	+	Intragenic	9360	-1796	plasticity-related gene 2	NP_853665		NM_181634	11344162	11355318	11156	258	20	154	15.5	59.7	11353393	11353651
Cap	3683	chr8	45324845	45325469	624	2.58	chr8:45324985-45325202				Unknown										217	21	143	19.4	65.9	45324985	45325202
Cap	147	chr1	265308707	265309129	422	2.59	chr1:265308853-265309243				Unknown										390	28	239	14.4	61.3	265308853	265309243
Cap	1718	chr17	92443882	92444377	495	2.59	chr17:92444021-92444254				Unknown										233	19	124	16.3	53.2	92444021	92444254
Cap	1816	chr18	29711046	29711760	714	2.59	chr18:29711238-29711514	Pcdha9	ICP	+	Promoter	-3858	-216655	protocadherin alpha 9	NP_955802	synaptic cadherin [RGD].	NM_199508	29715234	29928031	212797	276	25	165	18.1	59.8	29711238	29711514
Cap	2765	chr4	83416881	83417410	529	2.59	chr4:83416866-83417401				Unknown										535	41	350	15.3	65.4	83416866	83417401
Cap	2996	chr5	48643452	48643873	421	2.59	chr5:48643632-48643956				Unknown										324	26	202	16	62.3	48643632	48643956
Cap	3320	chr6	137851291	137851721	430	2.59	chr6:137851475-137851794	Mta1	LCP	+	Intragenic	191634	-292348	metastasis associated 1	NP_072110	high expression of this protein correlates with the metastatic potential of cells; may have a role in gene regulation [RGD].	NM_022588	137660000	138143982	483982	319	21	178	13.2	55.8	137851475	137851794
Cap	3433	chr7	10809139	10809782	643	2.59	chr7:10809355-10809615	Uqcr	ICP	+	Promoter	-6936	-11566	ubiquinol-cytochrome c reductase, 6.4kDa	NP_001119569		NM_001126097	10816421	10821051	4630	260	25	176	19.2	67.7	10809355	10809615
Cap	3902	chr9	93139626	93140144	518	2.59	chr9:93139832-93140105				Unknown										273	20	159	14.7	58.2	93139832	93140105
Cap	900	chr11	67175795	67176444	649	2.6	chr11:67175984-67176210	Pdia5	ICP	+	Intragenic	58349	-28383	protein disulfide isomerase-associated 5	NP_001014147		NM_001014125	67117748	67204480	86732	226	18	160	15.9	70.8	67175984	67176210
Cap	1818	chr18	29723350	29723695	345	2.6	chr18:29722971-29723626	Pcdha11	ICP	+	Promoter	-5304	-204732	protocadherin alpha 11	NP_955780		NM_199486	29728602	29928030	199428	655	54	401	16.5	61.2	29722971	29723626
Cap	4096	chrX	160445421	160445945	524	2.6	chrX:160445385-160445966				Unknown										581	41	308	14.1	53	160445385	160445966
Cap	1582	chr16	31896472	31896891	419	2.61	chr16:31896199-31896855				Unknown										656	57	429	17.4	65.4	31896199	31896855
Cap	2278	chr20	5194525	5195048	523	2.61	chr20:5194719-5194952	Syngap1	LCP	+	Intragenic	4897	-13614	synaptic Ras GTPase activating protein 1 homolog	NP_001106880	acts as a Ras-GTPase activator; activity is inhibited by CaMKII phosphorylation; may inhibit NMDA receptor mediated MAPK signaling [RGD].	NM_001113409	5189938	5208449	18511	233	17	131	14.6	56.2	5194719	5194952
Cap	1002	chr12	11164461	11164792	331	2.62	chr12:11164391-11164840	Usp42	LCP	+	Intragenic	13082	-5453	ubiquitin specific peptidase 42	NP_001099379		NM_001105909	11151533	11170068	18535	449	31	287	13.8	63.9	11164391	11164840
Cap	1578	chr16	19167712	19168233	521	2.62	chr16:19167683-19168048	Pik3r2	HCP	+	Promoter	-3235	-11785	phosphatidylinositol 3-kinase, regulatory	NP_071521	regulatory subunit of the enzyme phosphatidylinositol 3-kinase; involved in cellular signaling mechanisms [RGD].	NM_022185	19171100	19179650	8550	365	26	242	14.2	66.3	19167683	19168048
Cap	2079	chr2	198164090	198164799	709	2.62	chr2:198164148-198164720	Sycp1	ICP	-	Promoter	177	-174818	synaptonemal complex protein 1	NP_036942	component of the transverse filaments of synaptonemal complexes (SCs) that are formed between homologous chromosomes during meiotic prophase; may be involved in chromosome pairing and recombination [RGD].	NM_012810	198164611	197989616	174995	572	43	367	15	64.2	198164148	198164720
Cap	2293	chr20	10989794	10990416	622	2.62	chr20:10989894-10990195	Aire	ICP	+	Intragenic	10014	-6058	autoimmune regulator (autoimmune	NP_001099849		NM_001106379	10980030	10996102	16072	301	28	199	18.6	66.1	10989894	10990195
Cap	42	chr1	79069202	79069641	439	2.63	chr1:79069406-79069698	Pvrl2	HCP	-	Promoter	-9866	-47721	poliovirus receptor related 2	NP_001012064		NM_001012064	79059686	79021831	37855	292	21	174	14.4	59.6	79069406	79069698
Cap	558	chr10	12814778	12815207	429	2.63	chr10:12814930-12815132	Znf213	HCP	-	Downstream	14790	7876	zinc finger protein 213	NP_001099234		NM_001105764	12829821	12822907	6914	202	15	102	14.9	50.5	12814930	12815132
Cap	1716	chr17	86201222	86201658	436	2.63	chr17:86201372-86201580				Unknown										208	16	122	15.4	58.7	86201372	86201580
Cap	1924	chr19	20601525	20601954	429	2.63	chr19:20601769-20601976	Zfp423	ICP	+	Intragenic	162864	-137364	zinc finger protein 423	NP_446035	zinc finger protein that interacts with the Olf-1/EBF transcription factor; plays a role in regulation of differentiation of olfactory neurons [RGD].	NM_053583	20439008	20739236	300228	207	17	126	16.4	60.9	20601769	20601976
Cap	2049	chr2	53934298	53934847	549	2.63	chr2:53934199-53935299	Oxct1	HCP	+	Promoter	317	-94479	3-oxoacid CoA transferase 1	NP_001121052		NM_001127580	53934432	54029228	94796	1100	108	742	19.6	67.5	53934199	53935299
Cap	2376	chr20	7090751	7091370	619	2.63	chr20:7090915-7091552	Brpf3	ICP	+	Promoter	357	-30331	bromodomain and PHD finger containing, 3	NP_001101085		NM_001107615	7090876	7121564	30688	637	44	382	13.8	60	7090915	7091552
Cap	2773	chr4	127958908	127959437	529	2.63	chr4:127958876-127959383				Unknown										507	35	308	13.8	60.7	127958876	127959383
Cap	3014	chr5	138693277	138693898	621	2.63	chr5:138693467-138693787				Unknown										320	24	209	15	65.3	138693467	138693787
Cap	4	chr1	3477696	3478240	544	2.64	chr1:3477839-3478044				Unknown										205	17	133	16.6	64.9	3477839	3478044
Cap	1164	chr13	46189808	46190342	534	2.64	chr13:46190050-46190266				Unknown										216	17	146	15.7	67.6	46190050	46190266
Cap	1476	chr15	39778481	39779000	519	2.64	chr15:39778716-39778934				Unknown										218	18	143	16.5	65.6	39778716	39778934
Cap	1804	chr18	12348754	12349188	434	2.64	chr18:12348968-12349233				Unknown										265	21	144	15.8	54.3	12348968	12349233
Cap	1837	chr18	77157377	77158018	641	2.64	chr18:77157574-77157868	Pqlc1	HCP	+	Intragenic	6528	-29880	PQ loop repeat containing 1	NP_001013207		NM_001013189	77151193	77187601	36408	294	26	158	17.7	53.7	77157574	77157868
Cap	1957	chr19	54652471	54652990	519	2.64	chr19:54652689-54652934				Unknown										245	18	145	14.7	59.2	54652689	54652934
Cap	2050	chr2	77353779	77354306	527	2.64	chr2:77353909-77354151	Myo10	ICP	+	Intragenic	171003	-31866	myosin X	NP_001101127		NM_001107657	77183027	77385896	202869	242	17	143	14	59.1	77353909	77354151
Cap	3546	chr7	16042708	16043642	934	2.64	chr7:16043068-16043303	LOC314655	HCP	+	Promoter	36	-16479	hypothetical protein LOC314655	NP_001030102		NM_001034930	16043149	16059664	16515	235	25	158	21.3	67.2	16043068	16043303
Cap	3484	chr7	121815964	121816488	524	2.64	chr7:121815988-121816243	Mpped1	ICP	+	Promoter	104	-67566	metallophosphoesterase domain containing 1	NP_001124041		NM_001130569	121816011	121883681	67670	255	18	169	14.1	66.3	121815988	121816243
Cap	3699	chr8	111840944	111841560	616	2.64	chr8:111841086-111841488				Unknown										402	28	248	13.9	61.7	111841086	111841488
Cap	180	chr1	42251973	42253162	1189	2.65	chr1:42252881-42253753	Igf2r	HCP	+	Promoter	45	-88327	insulin-like growth factor 2 receptor	NP_036888	mediates internalization of insulin-like growth factor II; plays a role in lysosomal enzyme transport [RGD]. Publication Note: This RefSeq record includes a subset of the publications that are available for this gene. Please see the Entrez Gene record to access additional publications.	NM_012756	42253272	42341644	88372	872	92	569	21.1	65.3	42252881	42253753
Cap	439	chr1	200940853	200941752	899	2.65	chr1:200941110-200941456	LOC502372	ICP	-	Promoter	64	-10921	hypothetical protein LOC502372	NP_001020229		NM_001025058	200941347	200930362	10985	346	26	232	15	67.1	200941110	200941456
Cap	597	chr10	75909150	75909585	435	2.65	chr10:75909393-75909604	Mtmr4	LCP	+	Downstream	25973	3058	myotubularin related protein 4	NP_001099297		NM_001105827	75883525	75906440	22915	211	19	148	18	70.1	75909393	75909604
Cap	1831	chr18	70708425	70709141	716	2.65	chr18:70708619-70708910				Unknown										291	27	185	18.6	63.6	70708619	70708910
Cap	2058	chr2	123165492	123165917	425	2.65	chr2:123165241-123165852				Unknown										611	47	381	15.4	62.4	123165241	123165852
Cap	2457	chr3	8834175	8834796	621	2.65	chr3:8833587-8834753				Unknown										1166	85	749	14.6	64.2	8833587	8834753
Cap	2522	chr3	3594224	3595293	1069	2.65	chr3:3595197-3595801	Abca2	HCP	+	Promoter	77	-19821	ATP-binding cassette, sub-family A (ABC1),	NP_077372	glycosylated ABC transporter that binds ATP in the presence of magnesium; may play an important role in brain function [RGD].	NM_024396	3595422	3615320	19898	604	60	359	19.9	59.4	3595197	3595801
Cap	2501	chr3	159249043	159249892	849	2.65	chr3:159248889-159249505	Pard6b	HCP	+	Intragenic	18525	-2558	par-6 (partitioning defective 6) homolog beta	NP_001102079		NM_001108609	159230672	159251755	21083	616	45	367	14.6	59.6	159248889	159249505
Cap	2501	chr3	159249043	159249892	849	2.65	chr3:159249607-159249820	Pard6b	HCP	+	Intragenic	19041	-2042	par-6 (partitioning defective 6) homolog beta	NP_001102079		NM_001108609	159230672	159251755	21083	213	15	131	14.1	61.5	159249607	159249820
Cap	3432	chr7	10592895	10593521	626	2.65	chr7:10593118-10593367				Unknown										249	20	153	16.1	61.4	10593118	10593367
Cap	30	chr1	76314637	76315351	714	2.66	chr1:76314860-76315094	Ehd2	ICP	-	Promoter	-4393	-22798	EH-domain containing 2	NP_001020068		NM_001024897	76310584	76292179	18405	234	18	156	15.4	66.7	76314860	76315094
Cap	611	chr10	94569840	94570394	554	2.66	chr10:94569640-94570427				Unknown										787	59	490	15	62.3	94569640	94570427
Cap	911	chr11	84839855	84840371	516	2.66	chr11:84840082-84840309				Unknown										227	16	139	14.1	61.2	84840082	84840309
Cap	2089	chr2	231036642	231036886	244	2.66	chr2:231036541-231036876				Unknown										335	22	178	13.1	53.1	231036541	231036876
Cap	2169	chr2	144405916	144406249	333	2.66	chr2:144405811-144406164	Sohlh2	ICP	+	Promoter	-60	-22514	spermatogenesis and oogenesis specific basic	NP_001030133		NM_001034961	144406047	144428501	22454	353	25	228	14.2	64.6	144405811	144406164
Cap	2317	chr20	44641159	44641593	434	2.66	chr20:44641112-44641330	Cdc2l6	HCP	+	Intragenic	113759	-28807	cell division cycle 2-like 6 (CDK8-like)	NP_001101104		NM_001107634	44527462	44670028	142566	218	16	115	14.7	52.8	44641112	44641330
Cap	2517	chr3	169528842	169529264	422	2.66	chr3:169528951-169529225	Slco4a1	HCP	+	Intragenic	8501	-10489	solute carrier organic anion transporter family,	NP_598292	transports 3,3',5-triiodo-L-thyronine; may play a role in thyroid hormone metabolism [RGD].	NM_133608	169520587	169539577	18990	274	21	162	15.3	59.1	169528951	169529225
Cap	3452	chr7	26325786	26326360	574	2.66	chr7:26325915-26326148				Unknown										233	19	122	16.3	52.4	26325915	26326148
Cap	3692	chr8	94844170	94844728	558	2.66	chr8:94844406-94844613				Unknown										207	14	112	13.5	54.1	94844406	94844613
Cap	4094	chrX	159509033	159509422	389	2.66	chrX:159509064-159509311				Unknown										247	21	143	17	57.9	159509064	159509311
Cap	125	chr1	207705179	207705802	623	2.67	chr1:207705380-207705672	Yif1	HCP	+	Promoter	-5750	-9812	Yip1p-interacting factor	NP_742014	yeast homolog binds Ras-like GTPases; may play a role in endoplasmic reticulum-to-Golgi protein transport [RGD].	NM_172017	207711276	207715338	4062	292	23	183	15.8	62.7	207705380	207705672
Cap	2409	chr20	14173643	14174738	1095	2.67	chr20:14173573-14174156	Gnaz	ICP	-	Promoter	272	-25862	guanine nucleotide binding protein, alpha z	NP_037321	member of a family of G-protein alpha subunits; may have pertussis toxin-insensitive activity [RGD].	NM_013189	14174136	14148002	26134	583	46	366	15.8	62.8	14173573	14174156
Cap	3471	chr7	114213184	114213618	434	2.67	chr7:114211189-114213648				Unknown										2459	191	1655	15.5	67.3	114211189	114213648
Cap	41	chr1	79048093	79048618	525	2.68	chr1:79048237-79048557				Unknown										320	28	201	17.5	62.8	79048237	79048557
Cap	56	chr1	85309096	85309707	611	2.68	chr1:85309160-85309522				Unknown										362	28	225	15.5	62.2	85309160	85309522
Cap	131	chr1	213341205	213341910	705	2.68	chr1:213341379-213341713	Slc15a3	ICP	+	Promoter	225	-14556	solute carrier family 15, member 3	NP_647557	may play a role in protein catabolism in the lymphatic system [RGD].	NM_139341	213341321	213356102	14781	334	26	213	15.6	63.8	213341379	213341713
Cap	601	chr10	85780081	85780407	326	2.68	chr10:85779955-85780507	Osbpl7	LCP	+	Intragenic	8291	-9259	oxysterol binding protein-like 7	NP_001100514		NM_001107044	85771940	85789490	17550	552	36	350	13	63.4	85779955	85780507
Cap	1587	chr16	47234360	47234714	354	2.68	chr16:47234340-47234661	Dctd	HCP	-	Downstream	27397	6479	dCMP deaminase	NP_001013904		NM_001013882	47261897	47240979	20918	321	24	199	15	62	47234340	47234661
Cap	1820	chr18	29749274	29749523	249	2.68	chr18:29748852-29749552	Pcdha13	ICP	+	Intragenic	1631	-178829	protocadherin alpha 13	NP_446386	expressed in odontoblasts and early stage ameloblasts during incisor development; may play a role in cell-cell interactions during formation of dentin and enamel [RGD].	NM_053934	29747571	29928031	180460	700	51	424	14.6	60.6	29748852	29749552
Cap	1922	chr19	15748265	15748504	239	2.68	chr19:15747789-15752910	Irx5	HCP	-	Promoter	65	-2628	iroquois homeobox 5	NP_001025215		NM_001030044	15750414	15747721	2693	5121	386	3114	15.1	60.8	15747789	15752910
Cap	2770	chr4	117673564	117673995	431	2.68	chr4:117673403-117674896				Unknown										1493	130	927	17.4	62.1	117673403	117674896
Cap	3428	chr7	10048436	10049064	628	2.68	chr7:10048559-10049004				Unknown										445	38	295	17.1	66.3	10048559	10049004
Cap	3	chr1	3399276	3399710	434	2.69	chr1:3399509-3399741				Unknown										232	21	137	18.1	59.1	3399509	3399741
Cap	132	chr1	227481075	227481597	522	2.69	chr1:227481166-227481480				Unknown										314	21	194	13.4	61.8	227481166	227481480
Cap	1697	chr17	13212239	13212891	652	2.69	chr17:13212364-13212622				Unknown										258	18	149	14	57.8	13212364	13212622
Cap	2016	chr19	49588371	49589426	1055	2.69	chr19:49589391-49589869	Hsbp1	HCP	+	Promoter	60	-4969	heat shock factor binding protein 1	NP_775142		NM_173119	49589570	49594599	5029	478	45	319	18.8	66.7	49589391	49589869
Cap	2285	chr20	7090986	7091505	519	2.69	chr20:7090915-7091552	Brpf3	ICP	+	Promoter	357	-30331	bromodomain and PHD finger containing, 3	NP_001101085		NM_001107615	7090876	7121564	30688	637	44	382	13.8	60	7090915	7091552
Cap	2466	chr3	47969203	47969722	519	2.69	chr3:47969444-47969648				Unknown										204	18	112	17.6	54.9	47969444	47969648
Cap	3039	chr5	156990785	156991250	465	2.69	chr5:156990657-156991147	Hp1bp3	HCP	+	Promoter	-5767	-33141	heterochromatin protein 1, binding protein 3	NP_954539	mouse homolog may play a role in chromatin structure and function [RGD].	NM_199108	156996669	157024043	27374	490	38	299	15.5	61	156990657	156991147
Cap	4045	chrUn	2940740	2941024	284	2.69	chrUn:2940789-2941175				Unknown										386	27	247	14	64	2940789	2941175
Cap	73	chr1	95518839	95519363	524	2.7	chr1:95518817-95519175	Prrg2	ICP	-	Downstream	14415	7094	proline-rich Gla (G-carboxyglutamic acid)	NP_001101952		NM_001108482	95533411	95526090	7321	358	30	232	16.8	64.8	95518817	95519175
Cap	207	chr1	77234518	77234948	430	2.7	chr1:77234826-77235116	Ptgir	LCP	+	Promoter	434	-1950	prostaglandin I receptor (IP)	NP_001071112		NM_001077644	77234537	77236921	2384	290	21	183	14.5	63.1	77234826	77235116
Cap	68	chr1	94876902	94877423	521	2.7	chr1:94877103-94877388	Syt3	LCP	+	Intragenic	10439	-3212	synaptotagmin III	NP_061995	member of the synaptotagmin family; brain specific calcium/phospholipid-binding protein; essential for calcium-dependent synaptic vesicle exocytosis; may be the calcium sensor for fast calcium-triggered neurotransmitter release [RGD].	NM_019122	94866806	94880457	13651	285	22	173	15.4	60.7	94877103	94877388
Cap	84	chr1	118680974	118681584	610	2.7	chr1:118681075-118681302	Trpm1	LCP	+	Intragenic	97673	-19463	transient receptor potential cation channel,	NP_001032823		NM_001037734	118583515	118700651	117136	227	17	130	15	57.3	118681075	118681302
Cap	598	chr10	76467723	76468346	623	2.7	chr10:76467870-76468263	Cuedc1	HCP	+	Intragenic	73960	-20066	CUE domain containing 1	NP_001013993		NM_001013971	76394106	76488132	94026	393	37	258	18.8	65.6	76467870	76468263
Cap	891	chr11	33889378	33889917	539	2.7	chr11:33889593-33889849				Unknown										256	27	163	21.1	63.7	33889593	33889849
Cap	2492	chr3	153754291	153754811	520	2.7	chr3:153754518-153754745				Unknown										227	18	119	15.9	52.4	153754518	153754745
Cap	3421	chr7	1054066	1054595	529	2.7	chr7:1054288-1054533				Unknown										245	23	171	18.8	69.8	1054288	1054533
Cap	35	chr1	78175606	78175975	369	2.71	chr1:78175511-78175799				Unknown										288	20	165	13.9	57.3	78175511	78175799
Cap	1158	chr13	20263887	20264533	646	2.71	chr13:20264095-20264338				Unknown										243	19	145	15.6	59.7	20264095	20264338
Cap	2488	chr3	146117604	146117944	340	2.71	chr3:146117641-146117885	Myh7b	LCP	+	Intragenic	1956	-22492	myosin, heavy chain 7B, cardiac muscle, beta	NP_001101264		NM_001107794	146115807	146140255	24448	244	19	152	15.6	62.3	146117641	146117885
Cap	3029	chr5	148584344	148585067	723	2.71	chr5:148584590-148584796				Unknown										206	17	121	16.5	58.7	148584590	148584796
Cap	3509	chr7	137838074	137838323	249	2.71	chr7:137837795-137838102	Prph	ICP	+	Intragenic	1797	-1983	peripherin	NP_036765	contributes to the formation of intermediate filament networks [RGD]. Publication Note: This RefSeq record includes a subset of the publications that are available for this gene. Please see the Entrez Gene record to access additional publications.	NM_012633	137836151	137839931	3780	307	25	193	16.3	62.9	137837795	137838102
Cap	3682	chr8	45314131	45314572	441	2.71	chr8:45314056-45314319				Unknown										263	24	154	18.3	58.6	45314056	45314319
Cap	3701	chr8	112106121	112106825	704	2.71	chr8:112106358-112106564	Armet	HCP	-	Downstream	6850	4896	arginine-rich, mutated in early stage tumors	NP_001101653		NM_001108183	112113311	112111357	1954	206	15	136	14.6	66	112106358	112106564
Cap	14	chr1	30292242	30292951	709	2.72	chr1:30292450-30292720				Unknown										270	21	174	15.6	64.4	30292450	30292720
Cap	1047	chr12	45693535	45694154	619	2.72	chr12:45693666-45693896				Unknown										230	17	121	14.8	52.6	45693666	45693896
Cap	1699	chr17	17737535	17738154	619	2.72	chr17:17737499-17738066				Unknown										567	43	348	15.2	61.4	17737499	17738066
Cap	1920	chr19	10692758	10693408	650	2.72	chr19:10692959-10693167	Ccl22	LCP	-	Downstream	11066	4260	small inducible cytokine A22	NP_476551	chemoattractant for dendritic cells, natural killer (NK) cells, and the Th2 subset of peripheral blood T cells [RGD].	NM_057203	10704129	10697323	6806	208	17	130	16.3	62.5	10692959	10693167
Cap	2061	chr2	139124499	139124928	429	2.72	chr2:139124455-139124657				Unknown										202	16	123	15.8	60.9	139124455	139124657
Cap	2764	chr4	80775402	80776021	619	2.72	chr4:80775552-80775756				Unknown										204	16	126	15.7	61.8	80775552	80775756
Cap	879	chr10	109788843	109789553	710	2.73	chr10:109789457-109789776	Fscn2	LCP	+	Promoter	525	-6015	fascin homolog 2, actin-bundling protein,	NP_001100542		NM_001107072	109789091	109795631	6540	319	25	206	15.7	64.6	109789457	109789776
Cap	626	chr10	105699503	105700244	741	2.73	chr10:105699632-105700059	Mif4gd	HCP	-	Promoter	-8161	-12626	MIF4G domain containing	NP_001014144		NM_001014122	105691684	105687219	4465	427	28	252	13.1	59	105699632	105700059
Cap	1030	chr12	35708151	35708680	529	2.73	chr12:35708292-35708515				Unknown										223	18	134	16.1	60.1	35708292	35708515
Cap	1707	chr17	25122270	25122704	434	2.73	chr17:25122370-25122573	Atxn1	LCP	+	Intragenic	403089	-15799	spinocerebellar ataxia 1	NP_036858	human homolog contains an expanded CAG nucleotide repeat region that causes the neurodegenerative disorder spinocerebellar ataxia type 1 (SCA1) [RGD]. Sequence Note: The sequence X91619.1 is from a chimeric clone. Only the ataxin 1 region was propagated into this RefSeq record.	NM_012726	24719382	25138270	418888	203	15	134	14.8	66	25122370	25122573
Cap	1956	chr19	53844848	53845372	524	2.73	chr19:53844989-53845212	Gas8	ICP	+	Intragenic	6593	-12526	growth arrest specific 8	NP_001034119		NM_001039030	53838507	53857626	19119	223	17	140	15.2	62.8	53844989	53845212
Cap	2321	chr20	46184311	46184555	244	2.73	chr20:46184309-46185108				Unknown										799	65	511	16.3	64	46184309	46185108
Cap	2279	chr20	5349145	5349384	239	2.73	chr20:5349315-5349660	Itpr3	HCP	+	Intragenic	57058	-8013	inositol 1,4,5-triphosphate receptor 3	NP_037270	receptor for Inositol 1,4,5-trisphosphate (IP3); involved in second messenger signaling [RGD]. Publication Note: This RefSeq record includes a subset of the publications that are available for this gene. Please see the Entrez Gene record to access additional publications.	NM_013138	5292429	5357500	65071	345	27	228	15.7	66.1	5349315	5349660
Cap	2489	chr3	147120188	147120710	522	2.73	chr3:147120163-147120518	Dlgap4	LCP	+	Intragenic	39119	-55684	discs, large homolog-associated protein 4	NP_775168	binds neuronal cell guanylate kinase PSD-95/SAP90; may play a role in post synaptic density structure and synaptic function [RGD].	NM_173145	147081221	147176024	94803	355	27	236	15.2	66.5	147120163	147120518
Cap	3055	chr5	166026060	166026586	526	2.73	chr5:166026139-166026489				Unknown										350	31	234	17.7	66.9	166026139	166026489
Cap	2988	chr5	5244214	5244638	424	2.73	chr5:5244446-5244662	Ncoa2	LCP	+	Intragenic	46664	-28446	nuclear receptor coactivator 2	NP_114010	binds to nuclear receptor complex leading to coactivation [RGD].	NM_031822	5197890	5273000	75110	216	16	115	14.8	53.2	5244446	5244662
Cap	3310	chr6	115267128	115267675	547	2.73	chr6:115267246-115267520				Unknown										274	21	161	15.3	58.8	115267246	115267520
Cap	3479	chr7	116678008	116678532	524	2.73	chr7:116678218-116678489				Unknown										271	27	196	19.9	72.3	116678218	116678489
Cap	70	chr1	95030309	95030924	615	2.74	chr1:95030498-95030805	Pold1	LCP	-	Promoter	-8965	-19933	polymerase (DNA directed), delta 1, catalytic	NP_067694	has DNA polymerase and 3'exonuclease activities; plays roles in DNA replication, base excision repair, and other types of DNA repair [RGD].	NM_021662	95021686	95010718	10968	307	23	200	15	65.1	95030498	95030805
Cap	1174	chr13	93346863	93347295	432	2.74	chr13:93347075-93347339	Zfp238	LCP	+	Intragenic	1303	-261	zinc finger protein 238	NP_073169	mouse homolog is a sequence-specific transcriptional repressor [RGD].	NM_022678	93345904	93347468	1564	264	19	164	14.4	62.1	93347075	93347339
Cap	2300	chr20	13825089	13825605	516	2.74	chr20:13825083-13825396				Unknown										313	24	187	15.3	59.7	13825083	13825396
Cap	3311	chr6	123690579	123691104	525	2.74	chr6:123690810-123691031				Unknown										221	15	122	13.6	55.2	123690810	123691031
Cap	3410	chr6	134020719	134021763	1044	2.74	chr6:134021479-134022356	Dlk1	HCP	+	Promoter	-98	-7158	delta-like 1	NP_446196	involved in maintaining the undifferentiated status of the preadipocyte [RGD].	NM_053744	134022015	134029075	7060	877	79	511	18	58.3	134021479	134022356
Cap	3506	chr7	136155872	136156351	479	2.74	chr7:136155901-136156179				Unknown										278	23	174	16.5	62.6	136155901	136156179
Cap	4093	chrX	139088251	139088672	421	2.74	chrX:139088219-139088536				Unknown										317	25	189	15.8	59.6	139088219	139088536
Cap	1051	chr12	46725142	46726806	1664	2.75	chr12:46721957-46728297				Unknown										6340	470	3912	14.8	61.7	46721957	46728297
Cap	1694	chr17	10199100	10199627	527	2.75	chr17:10199178-10199409				Unknown										231	22	130	19	56.3	10199178	10199409
Cap	1932	chr19	37480967	37481526	559	2.75	chr19:37481076-37481349				Unknown										273	18	170	13.2	62.3	37481076	37481349
Cap	1933	chr19	38547616	38547951	335	2.75	chr19:38547604-38547931				Unknown										327	27	225	16.5	68.8	38547604	38547931
Cap	2759	chr4	76523437	76524334	897	2.75	chr4:76523050-76524311	Sspo	LCP	+	Promoter	-9619	-63689	SCO-spondin	NP_001007017		NM_001007016	76533299	76587369	54070	1261	108	821	17.1	65.1	76523050	76524311
Cap	3293	chr6	20278739	20279083	344	2.75	chr6:20278787-20279003				Unknown										216	16	133	14.8	61.6	20278787	20279003
Cap	632	chr10	108968366	108968895	529	2.76	chr10:108968590-108968828				Unknown										238	17	140	14.3	58.8	108968590	108968828
Cap	635	chr10	109789459	109789988	529	2.76	chr10:109789457-109789776	Fscn2	LCP	+	Promoter	525	-6015	fascin homolog 2, actin-bundling protein,	NP_001100542		NM_001107072	109789091	109795631	6540	319	25	206	15.7	64.6	109789457	109789776
Cap	1003	chr12	11613634	11614348	714	2.76	chr12:11613872-11614089	Zdhhc4	LCP	+	Downstream	19050	8208	zinc finger, DHHC domain containing 4	NP_001013141		NM_001013123	11594930	11605772	10842	217	15	136	13.8	62.7	11613872	11614089
Cap	2478	chr3	116889848	116890277	429	2.76	chr3:116889516-116890259				Unknown										743	78	458	21	61.6	116889516	116890259
Cap	3422	chr7	1531560	1531791	231	2.76	chr7:1531283-1531537	Timeless	HCP	+	Intragenic	14841	-9094	timeless homolog	NP_112630	human homolog is a circadian clock gene [RGD].	NM_031340	1516569	1540504	23935	254	19	156	15	61.4	1531283	1531537
Cap	1807	chr18	12706345	12706974	629	2.77	chr18:12706548-12706834				Unknown										286	20	167	14	58.4	12706548	12706834
Cap	2045	chr2	25887830	25888449	619	2.77	chr2:25887949-25888293				Unknown										344	27	193	15.7	56.1	25887949	25888293
Cap	2313	chr20	21885052	21885673	621	2.77	chr20:21885270-21885517	Ado	HCP	+	Downstream	8253	6781	2-aminoethanethiol (cysteamine) dioxygenase	NP_001101096		NM_001107626	21877140	21878612	1472	247	16	147	13	59.5	21885270	21885517
Cap	3302	chr6	87930381	87930900	519	2.77	chr6:87930365-87930886				Unknown										521	43	315	16.5	60.5	87930365	87930886
Cap	1001	chr12	10976578	10977192	614	2.78	chr12:10976713-10976941				Unknown										228	17	136	14.9	59.6	10976713	10976941
Cap	3487	chr7	123979234	123979848	614	2.78	chr7:123979329-123979632				Unknown										303	25	187	16.5	61.7	123979329	123979632
Cap	3718	chr8	124448721	124449865	1144	2.78	chr8:124448531-124449865				Unknown										1334	88	802	13.2	60.1	124448531	124449865
Cap	3907	chr9	105703211	105703454	243	2.78	chr9:105702794-105703361				Unknown										567	37	311	13.1	54.9	105702794	105703361
Cap	3878	chr9	8573829	8574541	712	2.78	chr9:8574032-8574313	Foxp4	HCP	+	Intragenic	65145	-5425	forkhead box P4	NP_001102258		NM_001108788	8509027	8579597	70570	281	26	157	18.5	55.9	8574032	8574313
Cap	514	chr1	242451163	242452103	940	2.79	chr1:242450686-242451229	Pde6c	LCP	+	Degenerate_Promoter	-8695	-64145	phosphodiesterase 6C, cGMP specific, cone, alpha	NP_001101992		NM_001108522	242459652	242515102	55450	543	62	363	22.8	66.9	242450686	242451229
Cap	514	chr1	242451163	242452103	940	2.79	chr1:242450686-242451229	Rbp4	HCP	-	Degenerate_Promoter	40	-7163	retinol binding protein 4, plasma	NP_037294	may play a role in vitamin A transport [RGD].	NM_013162	242450997	242443794	7203	543	62	363	22.8	66.9	242450686	242451229
Cap	892	chr11	43824877	43825458	581	2.79	chr11:43825105-43825312	RGD1309437	ICP	+	Intragenic	61221	-243401	hypothetical protein LOC288176	NP_001013888		NM_001013866	43763987	44068609	304622	207	29	157	28	75.8	43825105	43825312
Cap	1814	chr18	29692865	29693110	245	2.79	chr18:29692361-29693096	Pcdha6	ICP	+	Promoter	-5147	-235302	protocadherin alpha 6	NP_955800	member of a the synaptic cadherins and Reelin receptor protein family [RGD].	NM_199506	29697875	29928030	230155	735	59	446	16.1	60.7	29692361	29693096
Cap	3286	chr6	8041044	8041561	517	2.79	chr6:8041224-8041545				Unknown										321	22	189	13.7	58.9	8041224	8041545
Cap	3317	chr6	134102541	134103356	815	2.79	chr6:134102554-134102842				Unknown										288	25	165	17.4	57.3	134102554	134102842
Cap	3317	chr6	134102541	134103356	815	2.79	chr6:134103109-134103436				Unknown										327	24	175	14.7	53.5	134103109	134103436
Cap	3369	chr6	91869315	91870044	729	2.79	chr6:91870005-91870413	Cdkl1	HCP	-	Promoter	-394	-69227	cyclin-dependent kinase-like 1 (CDC2-related	NP_001020292		NM_001025121	91869815	91800982	68833	408	34	264	16.7	64.7	91870005	91870413
Cap	561	chr10	12847279	12847898	619	2.8	chr10:12847198-12847869				Unknown										671	54	423	16.1	63	12847198	12847869
Cap	1463	chr15	12676588	12677288	700	2.8	chr15:12676779-12677076				Unknown										297	23	184	15.5	62	12676779	12677076
Cap	2042	chr2	23946876	23947265	389	2.8	chr2:23946741-23946992	Bhmt	ICP	-	Promoter	-3546	-23214	betaine-homocysteine methyltransferase	NP_110477	displays differential expression in a model of liver cirrhosis [RGD]. Publication Note: This RefSeq record includes a subset of the publications that are available for this gene. Please see the Entrez Gene record to access additional publications.	NM_030850	23943320	23923652	19668	251	25	158	19.9	62.9	23946741	23946992
Cap	2311	chr20	20110664	20111387	723	2.8	chr20:20110846-20111180				Unknown										334	26	195	15.6	58.4	20110846	20111180
Cap	2508	chr3	161087980	161088503	523	2.8	chr3:161088018-161088260				Unknown										242	22	125	18.2	51.7	161088018	161088260
Cap	3005	chr5	74986471	74986999	528	2.8	chr5:74986448-74986799				Unknown										351	29	219	16.5	62.4	74986448	74986799
Cap	3028	chr5	148384057	148384491	434	2.8	chr5:148384000-148384236	Yars	HCP	+	Downstream	33756	5129	tyrosyl-tRNA synthetase	NP_001020867		NM_001025696	148350362	148378989	28627	236	21	155	17.8	65.7	148384000	148384236
Cap	3890	chr9	37153193	37153709	516	2.8	chr9:37153256-37153560				Unknown										304	27	216	17.8	71.1	37153256	37153560
Cap	4056	chrUn	52896836	52897150	314	2.8	chrUn:52896854-52897432				Unknown										578	41	372	14.2	64.4	52896854	52897432
Cap	481	chr1	213340784	213341592	808	2.81	chr1:213341379-213341713	Slc15a3	ICP	+	Promoter	225	-14556	solute carrier family 15, member 3	NP_647557	may play a role in protein catabolism in the lymphatic system [RGD].	NM_139341	213341321	213356102	14781	334	26	213	15.6	63.8	213341379	213341713
Cap	590	chr10	56194527	56194766	239	2.81	chr10:56194221-56194539	RGD1561781	ICP	-	Promoter	-1650	-3346	similar to RIKEN cDNA 2600017H02	NP_001121627		NM_001128155	56192730	56191034	1696	318	33	225	20.8	70.8	56194221	56194539
Cap	1559	chr15	90214215	90214927	712	2.81	chr15:90214432-90214918	Trim52	ICP	+	Promoter	213	-1467	tripartite motif-containing 52	NP_001099526		NM_001106056	90214462	90216142	1680	486	39	304	16	62.6	90214432	90214918
Cap	1596	chr16	70765636	70766381	745	2.81	chr16:70765861-70766105				Unknown										244	17	145	13.9	59.4	70765861	70766105
Cap	1839	chr18	77851580	77852109	529	2.81	chr18:77851807-77852046	Sall3	ICP	-	Downstream	6727	459	sal-like 3	NP_001102362		NM_001108892	77858653	77852385	6268	239	19	127	15.9	53.1	77851807	77852046
Cap	1955	chr19	53750893	53751480	587	2.81	chr19:53750873-53751324	Tubb3	ICP	+	Intragenic	8447	-608	tubulin, beta 3	NP_640347		NM_139254	53742651	53751706	9055	451	32	267	14.2	59.2	53750873	53751324
Cap	2785	chr4	177634572	177635026	454	2.81	chr4:177634706-177634932				Unknown										226	16	129	14.2	57.1	177634706	177634932
Cap	3004	chr5	65239302	65239846	544	2.81	chr5:65239292-65239630	RGD1308165	ICP	+	Intragenic	12535	-10296	hypothetical protein LOC362516	NP_001102134		NM_001108664	65226926	65249757	22831	338	29	211	17.2	62.4	65239292	65239630
Cap	7	chr1	8667840	8668267	427	2.82	chr1:8667787-8668004				Unknown										217	17	112	15.7	51.6	8667787	8668004
Cap	585	chr10	47450374	47450828	454	2.82	chr10:47450616-47450826				Unknown										210	15	113	14.3	53.8	47450616	47450826
Cap	1475	chr15	38743982	38744506	524	2.82	chr15:38744194-38744450				Unknown										256	20	163	15.6	63.7	38744194	38744450
Cap	2473	chr3	77249283	77249712	429	2.82	chr3:77249424-77249743				Unknown										319	24	196	15	61.4	77249424	77249743
Cap	2461	chr3	11222460	11223079	619	2.82	chr3:11222670-11222938	Ppapdc3	LCP	+	Intragenic	13207	-1088	phosphatidic acid phosphatase type 2 domain	NP_001012349		NM_001012349	11209597	11223892	14295	268	19	166	14.2	61.9	11222670	11222938
Cap	4044	chrUn	2287394	2287658	264	2.82	chrUn:2287446-2287789				Unknown										343	33	229	19.2	66.8	2287446	2287789
Cap	37	chr1	78619971	78620504	533	2.83	chr1:78620025-78620236	Opa3	HCP	+	Degenerate_Downstream	27257	9101	optic atrophy 3	NP_001100956		NM_001107486	78592873	78611029	18156	211	19	138	18	65.4	78620025	78620236
Cap	37	chr1	78619971	78620504	533	2.83	chr1:78620025-78620236	Vasp	ICP	-	Degenerate_Downstream	16807	1348	vasodilator-stimulated phosphoprotein	NP_001101945		NM_001108475	78636937	78621478	15459	211	19	138	18	65.4	78620025	78620236
Cap	1960	chr19	56249150	56249676	526	2.83	chr19:56249231-56249566	Kcnk1	ICP	+	Intragenic	32799	-5901	potassium channel, subfamily K, member 1	NP_067720	a putative potassium channel with two P domains [RGD]. Sequence Note: This RefSeq record was created from transcript and genomic sequence data because no single transcript was available for the full length of the gene. The extent of this transcript is supported by transcript alignments and orthologous data.	NM_021688	56216599	56255299	38700	335	25	198	14.9	59.1	56249231	56249566
Cap	1953	chr19	53679670	53680004	334	2.83	chr19:53679674-53679982	Spire2	HCP	+	Intragenic	21208	-17457	spire homolog 2	NP_001121010		NM_001127538	53658620	53697285	38665	308	21	202	13.6	65.6	53679674	53679982
Cap	2284	chr20	6287669	6288193	524	2.83	chr20:6287904-6288134				Unknown										230	19	137	16.5	59.6	6287904	6288134
Cap	2491	chr3	149436631	149437034	403	2.83	chr3:149436641-149436844				Unknown										203	19	130	18.7	64	149436641	149436844
Cap	3019	chr5	144031013	144031373	360	2.83	chr5:144031031-144031312	Sf3a3	ICP	+	Promoter	-8889	-28510	splicing factor 3a, subunit 3	NP_001020869		NM_001025698	144040060	144059681	19621	281	20	175	14.2	62.3	144031031	144031312
Cap	3691	chr8	80279888	80280228	340	2.83	chr8:80279925-80280169	Leo1	HCP	+	Intragenic	13888	-10498	Leo1, Paf1/RNA polymerase II complex component,	NP_001005548		NM_001005548	80266159	80290545	24386	244	24	148	19.7	60.7	80279925	80280169
Cap	91	chr1	130021630	130022249	619	2.84	chr1:130021758-130022196				Unknown										438	32	266	14.6	60.7	130021758	130022196
Cap	45	chr1	79866663	79867372	709	2.84	chr1:79866762-79867251	Ethe1	HCP	+	Promoter	-8622	-23675	ethylmalonic encephalopathy 1	NP_001099704		NM_001106234	79875628	79890681	15053	489	45	347	18.4	71	79866762	79867251
Cap	1038	chr12	42323954	42324473	519	2.84	chr12:42324088-42324505	Arbp	HCP	-	Promoter	-5564	-8531	acidic ribosomal phosphoprotein P0	NP_071797	member of the ribosomal protein family; has similarity to other P ribosomal proteins over the carboxyl terminal sequence [RGD].	NM_022402	42318732	42315765	2967	417	31	248	14.9	59.5	42324088	42324505
Cap	1577	chr16	19130357	19130791	434	2.84	chr16:19130313-19130531				Unknown										218	18	139	16.5	63.8	19130313	19130531
Cap	1598	chr16	73378929	73379458	529	2.84	chr16:73379044-73379320				Unknown										276	23	170	16.7	61.6	73379044	73379320
Cap	1942	chr19	44569402	44570029	627	2.84	chr19:44569548-44569766	Wwox	HCP	+	Intragenic	53267	-260192	WW domain-containing oxidoreductase	NP_001099658		NM_001106188	44516390	44829849	313459	218	17	128	15.6	58.7	44569548	44569766
Cap	2515	chr3	167901156	167901874	718	2.84	chr3:167901390-167901619				Unknown										229	18	137	15.7	59.8	167901390	167901619
Cap	3316	chr6	133967724	133968350	626	2.84	chr6:133967934-133968206				Unknown										272	20	162	14.7	59.6	133967934	133968206
Cap	3465	chr7	111250521	111250755	234	2.84	chr7:111250275-111250497				Unknown										222	18	134	16.2	60.4	111250275	111250497
Cap	3478	chr7	116550761	116551280	519	2.84	chr7:116550874-116551105	Pscd4	LCP	+	Promoter	-6807	-31226	pleckstrin homology, Sec7 and coiled/coil	NP_001124049		NM_001130577	116557796	116582215	24419	231	17	116	14.7	50.2	116550874	116551105
Cap	3704	chr8	113382863	113383610	747	2.84	chr8:113383074-113383350				Unknown										276	24	176	17.4	63.8	113383074	113383350
Cap	3707	chr8	115386426	115387013	587	2.84	chr8:115386615-115386824	Lrrc2	HCP	+	Intragenic	31362	-402	leucine rich repeat containing 2	NP_001012001		NM_001012001	115355357	115387121	31764	209	18	106	17.2	50.7	115386615	115386824
Cap	564	chr10	14361208	14361842	634	2.85	chr10:14361446-14361668				Unknown										222	16	136	14.4	61.3	14361446	14361668
Cap	2498	chr3	156880088	156880617	529	2.85	chr3:156880222-156880456				Unknown										234	25	162	21.4	69.2	156880222	156880456
Cap	3451	chr7	24769786	24770519	733	2.85	chr7:24770014-24770238	Pmch	ICP	+	Promoter	-8006	-9322	pro-melanin-concentrating hormone	NP_036757	cyclic neuropeptide; induces hippocampal synaptic transmission [RGD]. Publication Note: This RefSeq record includes a subset of the publications that are available for this gene. Please see the Entrez Gene record to access additional publications.	NM_012625	24778132	24779448	1316	224	19	138	17	61.6	24770014	24770238
Cap	3687	chr8	48644882	48645500	618	2.85	chr8:48645070-48645373	Dscaml1	ICP	+	Intragenic	238849	-78554	Down syndrome cell adhesion molecule-like 1	NP_001101611		NM_001108141	48406372	48723775	317403	303	29	198	19.1	65.3	48645070	48645373
Cap	63	chr1	90646809	90647528	719	2.86	chr1:90647053-90647261				Unknown										208	19	139	18.3	66.8	90647053	90647261
Cap	83	chr1	107217386	107217888	502	2.86	chr1:107217409-107217630				Unknown										221	22	137	19.9	62	107217409	107217630
Cap	903	chr11	72771369	72772093	724	2.86	chr11:72771564-72771874				Unknown										310	24	172	15.5	55.5	72771564	72771874
Cap	1919	chr19	10165811	10166433	622	2.86	chr19:10165615-10166395	RGD1305215	HCP	-	Promoter	-3919	-17781	hypothetical protein LOC307643	NP_001014035		NM_001014013	10162086	10148224	13862	780	54	487	13.8	62.4	10165615	10166395
Cap	3046	chr5	160356178	160356888	710	2.86	chr5:160356213-160356826	Zbtb17	HCP	+	Intragenic	18532	-2539	zinc finger and BTB domain containing 17	NP_001012105		NM_001012105	160337987	160359058	21071	613	39	387	12.7	63.1	160356213	160356826
Cap	3504	chr7	135967853	135968474	621	2.86	chr7:135968067-135968338				Unknown										271	19	148	14	54.6	135968067	135968338
Cap	3505	chr7	136097237	136097863	626	2.86	chr7:136097430-136097736	Fam113b	ICP	+	Intragenic	93958	-8348	hypothetical protein LOC315283	NP_001034543		NM_001039454	136003625	136105931	102306	306	25	203	16.3	66.3	136097430	136097736
Cap	4084	chrX	69902482	69902835	353	2.86	chrX:69902456-69906031				Unknown										3575	240	2116	13.4	59.2	69902456	69906031
Cap	11	chr1	15676757	15677288	531	2.87	chr1:15676719-15677110				Unknown										391	29	220	14.8	56.3	15676719	15677110
Cap	33	chr1	77135405	77135744	339	2.87	chr1:77135401-77136524	Strn4	LCP	+	Promoter	-4345	-30116	striatin, calmodulin binding protein 4	NP_001100950		NM_001107480	77140307	77166078	25771	1123	114	763	20.3	67.9	77135401	77136524
Cap	1049	chr12	46446398	46446915	517	2.87	chr12:46446542-46446935				Unknown										393	33	230	16.8	58.5	46446542	46446935
Cap	1604	chr16	85495398	85496017	619	2.87	chr16:85495625-85495864				Unknown										239	17	129	14.2	54	85495625	85495864
Cap	2327	chr20	50359025	50359695	670	2.87	chr20:50359248-50359481				Unknown										233	18	127	15.5	54.5	50359248	50359481
Cap	2318	chr20	44787339	44787763	424	2.87	chr20:44787522-44787800	Ddo	ICP	+	Intragenic	20750	-1322	D-aspartate oxidase	NP_001102935		NM_001109465	44766911	44788983	22072	278	20	161	14.4	57.9	44787522	44787800
Cap	2745	chr4	4660103	4660682	579	2.87	chr4:4660314-4660573				Unknown										259	27	179	20.8	69.1	4660314	4660573
Cap	2999	chr5	59118371	59119076	705	2.87	chr5:59118272-59119092				Unknown										820	105	552	25.6	67.3	59118272	59119092
Cap	3322	chr6	138191204	138191824	620	2.87	chr6:138190247-138191832				Unknown										1585	126	1006	15.9	63.5	138190247	138191832
Cap	3455	chr7	28326850	28327564	714	2.87	chr7:28327077-28327317				Unknown										240	24	125	20	52.1	28327077	28327317
Cap	108	chr1	185924111	185924535	424	2.88	chr1:185924285-185924545				Unknown										260	25	149	19.2	57.3	185924285	185924545
Cap	1039	chr12	42717412	42718052	640	2.88	chr12:42717540-42717793	Cabp1	ICP	+	Intragenic	12820	-2899	calcium binding protein 1 isoform 1	NP_598213	component of calcium-mediated signal transduction; may be involved with the dendritic cytoskeleton [RGD].	NM_133529	42704846	42720565	15719	253	19	152	15	60.1	42717540	42717793
Cap	2493	chr3	153763548	153764266	718	2.88	chr3:153763686-153764042				Unknown										356	30	206	16.9	57.9	153763686	153764042
Cap	2468	chr3	52766544	52767113	569	2.88	chr3:52766689-52766894	LOC499806	ICP	+	Intragenic	36060	-56	hypothetical protein LOC499806	NP_001019482		NM_001024311	52730731	52766847	36116	205	16	116	15.6	56.6	52766689	52766894
Cap	3911	chr9	109851108	109851627	519	2.88	chr9:109851240-109851557	Dlgap1	ICP	+	Intragenic	395488	-167340	discs, large (Drosophila) homolog-associated	NP_075235	binds the guanylate kinase-like domain of the PSD-95 family of synaptic ion channel clustering proteins; may play a role in protein-protein interactions at the synaptic junction [RGD].	NM_022946	109455910	110018738	562828	317	26	198	16.4	62.5	109851240	109851557
Cap	259	chr1	85314182	85315093	911	2.89	chr1:85313978-85314254	Lrfn3	ICP	-	Promoter	279	-5200	leucine rich repeat and fibronectin type III	NP_001100972		NM_001107502	85314395	85308916	5479	276	25	174	18.1	63	85313978	85314254
Cap	1040	chr12	42757938	42758557	619	2.89	chr12:42758145-42758422	Acads	ICP	+	Promoter	-7000	-16245	acyl-Coenzyme A dehydrogenase, short chain	NP_071957		NM_022512	42765283	42774528	9245	277	24	171	17.3	61.7	42758145	42758422
Cap	1170	chr13	81721775	81722089	314	2.89	chr13:81721485-81722065				Unknown										580	55	325	19	56	81721485	81722065
Cap	1829	chr18	61524417	61525038	621	2.89	chr18:61524574-61524944	LOC502176	LCP	+	Intragenic	37923	-11	hypothetical protein LOC502176	NP_001020228		NM_001025057	61486836	61524770	37934	370	25	217	13.5	58.6	61524574	61524944
Cap	3486	chr7	123962309	123962836	527	2.89	chr7:123962544-123962761				Unknown										217	18	139	16.6	64.1	123962544	123962761
Cap	4053	chrUn	25345103	25345817	714	2.89	chrUn:25345313-25345578	Ptprd	HCP	+	Intragenic	45760	-14822	protein tyrosine phosphatase, receptor type, D	NP_062013	has protein tyrosine phosphatase activity; may regulate receptor tyrosine kinases [RGD].	NM_019140	25299685	25360267	60582	265	23	170	17.4	64.2	25345313	25345578
Cap	4079	chrX	26394176	26394611	435	2.89	chrX:26394410-26394638	Wdr13	ICP	+	Promoter	125	-7753	WD repeat domain 13	NP_001101717		NM_001108247	26394399	26402277	7878	228	18	145	15.8	63.6	26394410	26394638
Cap	67	chr1	94794292	94794821	529	2.9	chr1:94794341-94794563	Clec11a	LCP	-	Promoter	-6132	-9270	C-type lectin domain family 11, member a	NP_001012477	growth factor for primitive hematopoietic progenitor cells [RGD].	NM_001012459	94788320	94785182	3138	222	20	155	18	69.8	94794341	94794563
Cap	34	chr1	77234629	77235338	709	2.9	chr1:77234826-77235116	Ptgir	LCP	+	Promoter	434	-1950	prostaglandin I receptor (IP)	NP_001071112		NM_001077644	77234537	77236921	2384	290	21	183	14.5	63.1	77234826	77235116
Cap	2287	chr20	9074778	9075464	686	2.9	chr20:9074983-9075264				Unknown										281	20	154	14.2	54.8	9074983	9075264
Cap	130	chr1	211251148	211251804	656	2.91	chr1:211251353-211251628				Unknown										275	21	164	15.3	59.6	211251353	211251628
Cap	53	chr1	84224455	84225084	629	2.91	chr1:84224689-84224908				Unknown										219	18	142	16.4	64.8	84224689	84224908
Cap	118	chr1	200941038	200941555	517	2.91	chr1:200941110-200941456	LOC502372	ICP	-	Promoter	64	-10921	hypothetical protein LOC502372	NP_001020229		NM_001025058	200941347	200930362	10985	346	26	232	15	67.1	200941110	200941456
Cap	3485	chr7	123506523	123507047	524	2.91	chr7:123506556-123506801				Unknown										245	24	165	19.6	67.3	123506556	123506801
Cap	4074	chrUn_random	5353780	5354494	714	2.91	chrUn_random:5354006-5354236				Unknown										230	20	131	17.4	57	5354006	5354236
Cap	1348	chr14	86238225	86238885	660	2.92	chr14:86238397-86238749	Ankrd36	ICP	+	Intragenic	22434	-26824	ankyrin repeat domain 36	NP_941956	may play a role in spermatogenesis [RGD].	NM_198684	86216139	86265397	49258	352	43	238	24.4	67.6	86238397	86238749
Cap	1568	chr16	3794241	3794865	624	2.92	chr16:3794459-3794717	Wnt5a	HCP	+	Intragenic	12564	-5037	wingless-related MMTV integration site 5A	NP_072153	mouse homolog regulates chondrocyte differentiation and proliferation in longitudinal skeletal growth of long bones [RGD].	NM_022631	3782024	3799625	17601	258	25	161	19.4	62.4	3794459	3794717
Cap	1927	chr19	25747197	25747816	619	2.92	chr19:25747417-25747676	RGD1304881	HCP	+	Downstream	9594	2193	hypothetical protein LOC304653	NP_001100632		NM_001107162	25737952	25745353	7401	259	22	168	17	64.9	25747417	25747676
Cap	3905	chr9	104769182	104769931	749	2.92	chr9:104769176-104769930				Unknown										754	67	469	17.8	62.2	104769176	104769930
Cap	111	chr1	186712626	186713152	526	2.93	chr1:186712697-186713242				Unknown										545	39	343	14.3	62.9	186712697	186713242
Cap	40	chr1	79003736	79004265	529	2.93	chr1:79003851-79004319	Apoc1	LCP	-	Promoter	-4125	-7409	apolipoprotein C-I precursor	NP_001103466	may play a role in lipid transport [RGD].	NM_001109996	78999960	78996676	3284	468	43	315	18.4	67.3	79003851	79004319
Cap	28	chr1	72915419	72915937	518	2.93	chr1:72915654-72915864	Slc27a5	ICP	+	Promoter	-8870	-19462	bile acid CoA ligase	NP_077057	catalyzes the first of two steps in the conjugation of bile acids with the amino acids glycine and taurine [RGD].	NM_024143	72924629	72935221	10592	210	15	121	14.3	57.6	72915654	72915864
Cap	1597	chr16	70767847	70768565	718	2.93	chr16:70768064-70768293				Unknown										229	21	138	18.3	60.3	70768064	70768293
Cap	1601	chr16	81327467	81328010	543	2.93	chr16:81327594-81327832	Proz	ICP	-	Promoter	-5727	-16309	protein Z, vitamin K-dependent plasma	NP_001100795		NM_001107325	81321986	81311404	10582	238	19	140	16	58.8	81327594	81327832
Cap	3050	chr5	161043278	161043812	534	2.93	chr5:161043310-161043685				Unknown										375	30	226	16	60.3	161043310	161043685
Cap	3474	chr7	114805102	114805721	619	2.93	chr7:114805246-114805655				Unknown										409	33	256	16.1	62.6	114805246	114805655
Cap	59	chr1	87119906	87120618	712	2.94	chr1:87120147-87120357				Unknown										210	18	131	17.1	62.4	87120147	87120357
Cap	3446	chr7	16043028	16043462	434	2.94	chr7:16043068-16043303	LOC314655	HCP	+	Promoter	36	-16479	hypothetical protein LOC314655	NP_001030102		NM_001034930	16043149	16059664	16515	235	25	158	21.3	67.2	16043068	16043303
Cap	50	chr1	83845356	83845783	427	2.95	chr1:83845486-83845716	Sars2	ICP	+	Promoter	-2648	-14273	seryl-aminoacyl-tRNA synthetase 2	NP_001099710		NM_001106240	83848249	83859874	11625	230	18	152	15.7	66.1	83845486	83845716
Cap	570	chr10	20953782	20954489	707	2.95	chr10:20953882-20954363				Unknown										481	35	272	14.6	56.5	20953882	20954363
Cap	623	chr10	104690297	104691016	719	2.95	chr10:104690541-104690750				Unknown										209	19	137	18.2	65.6	104690541	104690750
Cap	660	chr10	15093067	15093426	359	2.95	chr10:15093265-15093551	RGD1307381	LCP	+	Promoter	-956	-3856	hypothetical protein LOC360498	NP_001014138		NM_001014116	15094364	15097264	2900	286	21	171	14.7	59.8	15093265	15093551
Cap	2288	chr20	9133722	9134349	627	2.95	chr20:9133934-9134206				Unknown										272	20	149	14.7	54.8	9133934	9134206
Cap	2746	chr4	5997160	5997686	526	2.95	chr4:5997312-5997516	LOC499971	LCP	+	Promoter	-5101	-10828	hypothetical protein LOC499971	NP_001019488		NM_001024317	6002515	6008242	5727	204	18	130	17.6	63.7	5997312	5997516
Cap	1583	chr16	31929895	31930415	520	2.96	chr16:31929906-31930189				Unknown										283	21	158	14.8	55.8	31929906	31930189
Cap	1841	chr18	81218127	81218839	712	2.96	chr18:81218338-81218596				Unknown										258	20	153	15.5	59.3	81218338	81218596
Cap	1930	chr19	28900131	28900690	559	2.96	chr19:28900375-28900581				Unknown										206	22	142	21.4	68.9	28900375	28900581
Cap	2093	chr2	247061981	247062605	624	2.96	chr2:247062047-247062423				Unknown										376	30	215	16	57.2	247062047	247062423
Cap	2470	chr3	60171736	60172358	622	2.96	chr3:60171857-60172110				Unknown										253	19	135	15	53.4	60171857	60172110
Cap	3058	chr5	166704029	166704743	714	2.96	chr5:166704251-166704498				Unknown										247	21	143	17	57.9	166704251	166704498
Cap	3882	chr9	11891082	11891601	519	2.96	chr9:11891311-11891537				Unknown										226	18	124	15.9	54.9	11891311	11891537
Cap	4083	chrX	63923112	63923826	714	2.96	chrX:63923279-63923630	LOC367808	HCP	-	Promoter	-8551	-17823	hypothetical protein LOC367808	NP_001014294		NM_001014272	63914903	63905631	9272	351	27	218	15.4	62.1	63923279	63923630
Cap	112	chr1	187032378	187032910	532	2.97	chr1:187032473-187032677	Fbxl19	ICP	+	Promoter	-1572	-20826	F-box and leucine-rich repeat protein 19	NP_001101022		NM_001107552	187034147	187053401	19254	204	19	153	18.6	75	187032473	187032677
Cap	112	chr1	187032378	187032910	532	2.97	chr1:187032907-187033123	Fbxl19	ICP	+	Promoter	-1132	-20386	F-box and leucine-rich repeat protein 19	NP_001101022		NM_001107552	187034147	187053401	19254	216	24	141	22.2	65.3	187032907	187033123
Cap	2282	chr20	5857800	5858519	719	2.97	chr20:5858020-5858266	Rps10	HCP	-	Promoter	-4249	-8826	ribosomal protein S10	NP_112371	ribosomal protein [RGD].	NM_031109	5853894	5849317	4577	246	20	149	16.3	60.6	5858020	5858266
Cap	3026	chr5	147992595	147993311	716	2.97	chr5:147992698-147993177	A3galt2	LCP	+	Intragenic	11934	-1204	iGb3 synthase	NP_612533	UDP-galactose: beta-d-galactosyl-1,4-glucosylceramide alpha-1, 3-galactosyltransferase; involved in the synthesis of the isoglobo-series of glycosphingolipids [RGD].	NM_138524	147981003	147994141	13138	479	40	300	16.7	62.6	147992698	147993177
Cap	3885	chr9	33003498	33004022	524	2.97	chr9:33003543-33003767	Dst	LCP	+	Intragenic	246102	-47620	dystonin	NP_001101678		NM_001108208	32757553	33051275	293722	224	17	136	15.2	60.7	33003543	33003767
Cap	4043	chrUn	448581	448965	384	2.97	chrUn:448593-448806	LOC310926	HCP	+	Downstream	20475	8844	hypothetical protein LOC310926	NP_001020173		NM_001025002	428224	439855	11631	213	28	142	26.3	66.7	448593	448806
Cap	47	chr1	80319366	80320075	709	2.98	chr1:80319600-80319816	Atp1a3	ICP	-	Promoter	-9874	-38995	Na+/K+ -ATPase alpha 3 subunit	NP_036638	contains 4.5 kb and 6 kb transcripts that display differential tissue expression [RGD].	NM_012506	80309834	80280713	29121	216	17	130	15.7	60.2	80319600	80319816
Cap	1018	chr12	28986797	28987421	624	2.98	chr12:28986857-28987241				Unknown										384	26	242	13.5	63	28986857	28987241
Cap	1015	chr12	27463130	27463840	710	2.98	chr12:27463276-27463676	Tyw1	ICP	-	Promoter	-8366	-94570	tRNA-yW synthesizing protein 1 homolog	NP_001100607		NM_001107137	27455110	27368906	86204	400	29	230	14.5	57.5	27463276	27463676
Cap	2090	chr2	233357657	233358178	521	2.98	chr2:233357883-233358125	Slc39a8	ICP	+	Intragenic	17608	-45453	solute carrier family 39 (metal ion	NP_001011952		NM_001011952	233340396	233403457	63061	242	17	131	14	54.1	233357883	233358125
Cap	2308	chr20	19477741	19478459	718	2.98	chr20:19477978-19478185				Unknown										207	18	119	17.4	57.5	19477978	19478185
Cap	3045	chr5	159128744	159129460	716	2.98	chr5:159128969-159129214				Unknown										245	19	147	15.5	60	159128969	159129214
Cap	589	chr10	56139026	56139738	712	2.99	chr10:56139247-56139492	RGD1563441	HCP	+	Downstream	5946	5273	hypothetical protein LOC497935	NP_001119764		NM_001126292	56133423	56134096	673	245	23	172	18.8	70.2	56139247	56139492
Cap	662	chr10	15383680	15384582	902	2.99	chr10:15384376-15385244	Tmem8	HCP	+	Promoter	163	-9310	transmembrane protein 8 (five membrane-spanning	NP_001100461		NM_001106991	15384647	15394120	9473	868	70	511	16.1	58.9	15384376	15385244
Cap	897	chr11	63855881	63856590	709	2.99	chr11:63856090-63856354	Cdgap	HCP	+	Intragenic	41307	-72789	Cdc42 GTPase-activating protein	NP_001099349		NM_001105879	63814915	63929011	114096	264	20	158	15.2	59.8	63856090	63856354
Cap	1341	chr14	65871804	65872226	422	2.99	chr14:65872029-65872263				Unknown										234	17	128	14.5	54.7	65872029	65872263
Cap	2316	chr20	43516886	43517605	719	2.99	chr20:43517118-43517348	Fyn	HCP	+	Intragenic	15381	-178333	fyn proto-oncogene	NP_036887	may mediate tyrosine phosphorylation of Cbl protein in cerebellum in response to ethanol administration [RGD]. Publication Note: This RefSeq record includes a subset of the publications that are available for this gene. Please see the Entrez Gene record to access additional publications.	NM_012755	43501852	43695566	193714	230	19	128	16.5	55.7	43517118	43517348
Cap	2507	chr3	160754613	160755328	715	2.99	chr3:160754844-160755063				Unknown										219	15	125	13.7	57.1	160754844	160755063
Cap	2845	chr4	66885925	66886979	1054	2.99	chr4:66885577-66885902	Rab19	ICP	+	Degenerate_Promoter	-3706	-13433	RAB19, member RAS oncogene family	NP_001019497		NM_001024326	66889445	66899172	9727	325	36	235	22.2	72.3	66885577	66885902
Cap	2845	chr4	66885925	66886979	1054	2.99	chr4:66885577-66885902	Slc37a3	HCP	-	Degenerate_Promoter	110	-45105	solute carrier family 37 (glycerol-3-phosphate	NP_001101324		NM_001107854	66885849	66840634	45215	325	36	235	22.2	72.3	66885577	66885902
Cap	2762	chr4	79843243	79843867	624	2.99	chr4:79843448-79843728	Snx10	LCP	+	Intragenic	54033	-9625	sorting nexin 10	NP_001013103		NM_001013085	79789555	79853213	63658	280	22	143	15.7	51.1	79843448	79843728
Cap	4088	chrX	91600057	91600576	519	2.99	chrX:91600286-91600514				Unknown										228	25	153	21.9	67.1	91600286	91600514
Cap	90	chr1	129580164	129580692	528	3	chr1:129580274-129580480				Unknown										206	14	115	13.6	55.8	129580274	129580480
Cap	1339	chr14	50474498	50475111	613	3	chr14:50474736-50474941				Unknown										205	21	131	20.5	63.9	50474736	50474941
Cap	2463	chr3	15381158	15381645	487	3	chr3:15381164-15381385				Unknown										221	17	127	15.4	57.5	15381164	15381385
Cap	2747	chr4	6058619	6059325	706	3	chr4:6058827-6059093				Unknown										266	24	192	18	72.2	6058827	6059093
Cap	2752	chr4	20908241	20908957	716	3	chr4:20908476-20908691	Grm3	ICP	+	Intragenic	163160	-1209514	glutamate receptor, metabotropic 3	NP_001099182	activation induces neuronal activity [RGD]. Publication Note: This RefSeq record includes a subset of the publications that are available for this gene. Please see the Entrez Gene record to access additional publications.	NM_001105712	20745423	22118097	1372674	215	21	132	19.5	61.4	20908476	20908691
Cap	72	chr1	95479602	95480031	429	3.01	chr1:95479592-95480406	Bcl2l12	LCP	-	Promoter	-8851	-17571	BCL2-like 12 (proline rich)	NP_001101950		NM_001108480	95471148	95462428	8720	814	84	540	20.6	66.3	95479592	95480406
Cap	1950	chr19	50904198	50904816	618	3.01	chr19:50904310-50904575				Unknown										265	18	171	13.6	64.5	50904310	50904575
Cap	2462	chr3	11326258	11326972	714	3.01	chr3:11326391-11326803				Unknown										412	31	273	15	66.3	11326391	11326803
Cap	2774	chr4	134698044	134698707	663	3.01	chr4:134698220-134698564				Unknown										344	23	200	13.4	58.1	134698220	134698564
Cap	2991	chr5	22709290	22709714	424	3.01	chr5:22709498-22709761	Chd7	LCP	+	Intragenic	160393	-628	chromodomain helicase DNA binding protein 7	NP_001101376		NM_001107906	22549236	22710257	161021	263	22	162	16.7	61.6	22709498	22709761
Cap	3470	chr7	114211769	114212103	334	3.01	chr7:114211189-114213648				Unknown										2459	191	1655	15.5	67.3	114211189	114213648
Cap	3459	chr7	36575729	36576348	619	3.01	chr7:36575969-36576182	Atp2b1	HCP	+	Intragenic	82415	-24205	plasma membrane calcium ATPase 1	NP_445763	regulates intracellular Ca2+ levels [RGD].	NM_053311	36493660	36600280	106620	213	17	128	16	60.1	36575969	36576182
Cap	3698	chr8	109354085	109354792	707	3.01	chr8:109354312-109354544	Acpp	LCP	-	Downstream	45868	8822	acid phosphatase, prostate	NP_064457		NM_020072	109400296	109363250	37046	232	18	130	15.5	56	109354312	109354544
Cap	3912	chr9	110481578	110482287	709	3.01	chr9:110481712-110482068				Unknown										356	27	200	15.2	56.2	110481712	110482068
Cap	3909	chr9	106893658	106894282	624	3.01	chr9:106893788-106894029	Lama1	ICP	+	Intragenic	38201	-86743	laminin, alpha 1	NP_001101707		NM_001108237	106855707	106980651	124944	241	18	128	14.9	53.1	106893788	106894029
Cap	3879	chr9	9803123	9803742	619	3.01	chr9:9803232-9803503	Srf	HCP	+	Downstream	14990	5728	serum response factor	NP_001102772		NM_001109302	9788377	9797639	9262	271	24	177	17.7	65.3	9803232	9803503
Cap	100	chr1	158382344	158382959	615	3.02	chr1:158382494-158382880	Arhgef17	ICP	-	Promoter	-6950	-65820	Rho guanine nucleotide exchange factor (GEF) 17	NP_001101008		NM_001107538	158375737	158316867	58870	386	27	245	14	63.5	158382494	158382880
Cap	899	chr11	66871959	66872592	633	3.02	chr11:66872072-66872308	Dirc2	ICP	+	Intragenic	42476	-38008	disrupted in renal carcinoma 2	NP_001012017		NM_001012017	66829714	66910198	80484	236	22	145	18.6	61.4	66872072	66872308
Cap	3449	chr7	21527090	21527914	824	3.02	chr7:21527236-21527451	Nuak1	HCP	+	Intragenic	65931	-1725	NUAK family, SNF1-like kinase, 1	NP_001100244		NM_001106774	21461412	21529068	67656	215	17	138	15.8	64.2	21527236	21527451
Cap	3449	chr7	21527090	21527914	824	3.02	chr7:21527979-21528249	Nuak1	HCP	+	Intragenic	66702	-954	NUAK family, SNF1-like kinase, 1	NP_001100244		NM_001106774	21461412	21529068	67656	270	24	167	17.8	61.9	21527979	21528249
Cap	1351	chr14	100796835	100797473	638	3.03	chr14:100796834-100797571	Spred2	HCP	+	Intragenic	98661	-514	sprouty-related, EVH1 domain containing 2	NP_001040559		NM_001047094	100698541	100797716	99175	737	66	426	17.9	57.8	100796834	100797571
Cap	2740	chr3_random	1610179	1610713	534	3.03	chr3_random:1609989-1611358	Gnas	HCP	+	Promoter	425	-686	GNAS (guanine nucleotide binding protein, alpha	NP_068617	This gene encodes two alternated gene products, the extra-long form of the alpha-subunit of the Gs G protein (XLalphas) and Alex protein, which are derived from two different ORFs. The Alex interacts with the XL domain of the XLalphas and inhibits its adenylyl cyclase-stimulating function. The XLalphas may play a role in cholera toxin mediated induction of secretory vesicle formation.	NM_021845	1610248	1611359	1111	1369	101	831	14.8	60.7	1609989	1611358
Cap	2771	chr4	122271562	122272656	1094	3.03	chr4:122271275-122272685	Gata2	ICP	+	Promoter	-7772	-16548	GATA binding protein 2	NP_254277	mediates phagocytosis function of alveolar macrophages [RGD].	NM_033442	122279752	122288528	8776	1410	113	852	16	60.4	122271275	122272685
Cap	3314	chr6	132295675	132296297	622	3.03	chr6:132294228-132296281				Unknown										2053	190	1351	18.5	65.8	132294228	132296281
Cap	124	chr1	207396751	207397472	721	3.04	chr1:207396937-207397206				Unknown										269	23	155	17.1	57.6	207396937	207397206
Cap	596	chr10	67433608	67433957	349	3.04	chr10:67433676-67434062	Gosr1	ICP	+	Intragenic	26667	-8732	golgi SNAP receptor complex member 1	NP_446036	component of the Golgi SNAP receptor (SNARE) complex involved with ER-Golgi transport [RGD].	NM_053584	67407202	67442601	35399	386	30	220	15.5	57	67433676	67434062
Cap	1167	chr13	70813195	70813649	454	3.04	chr13:70813414-70813665				Unknown										251	17	135	13.5	53.8	70813414	70813665
Cap	1332	chr14	17726993	17727525	532	3.04	chr14:17726922-17727383				Unknown										461	32	236	13.9	51.2	17726922	17727383
Cap	3510	chr7	137969457	137970177	720	3.04	chr7:137969661-137969947				Unknown										286	21	175	14.7	61.2	137969661	137969947
Cap	126	chr1	207936640	207936880	240	3.05	chr1:207936635-207937796	Gal3st3	ICP	+	Intragenic	8568	-1187	galactose-3-O-sulfotransferase 3	NP_001019461		NM_001024290	207928647	207938402	9755	1161	118	743	20.3	64	207936635	207937796
Cap	572	chr10	21159389	21160015	626	3.05	chr10:21159494-21159794				Unknown										300	20	179	13.3	59.7	21159494	21159794
Cap	1931	chr19	29601747	29602461	714	3.05	chr19:29601946-29602207				Unknown										261	17	148	13	56.7	29601946	29602207
Cap	2460	chr3	10977531	10978255	724	3.05	chr3:10977699-10978062				Unknown										363	25	208	13.8	57.3	10977699	10978062
Cap	22	chr1	67551117	67552306	1189	3.06	chr1:67550547-67552342				Unknown										1795	159	1194	17.7	66.5	67550547	67552342
Cap	1817	chr18	29716476	29717022	546	3.06	chr18:29716513-29716791	Pcdha10	ICP	+	Promoter	-4950	-211378	protocadherin alpha 10	NP_446391	may play a role in cell-cell adhesion during spermatogenesis [RGD].	NM_053939	29721602	29928030	206428	278	21	166	15.1	59.7	29716513	29716791
Cap	3068	chr5	170501851	170502465	614	3.06	chr5:170502083-170502300				Unknown										217	19	136	17.5	62.7	170502083	170502300
Cap	3069	chr5	170612524	170613248	724	3.06	chr5:170612769-170612978				Unknown										209	20	112	19.1	53.6	170612769	170612978
Cap	3693	chr8	94890122	94890556	434	3.06	chr8:94890363-94890577				Unknown										214	21	137	19.6	64	94890363	94890577
Cap	1470	chr15	32385765	32386403	638	3.07	chr15:32385844-32386180				Unknown										336	27	180	16.1	53.6	32385844	32386180
Cap	2225	chr2	198164310	198165425	1115	3.07	chr2:198164148-198164720	Sycp1	ICP	-	Promoter	177	-174818	synaptonemal complex protein 1	NP_036942	component of the transverse filaments of synaptonemal complexes (SCs) that are formed between homologous chromosomes during meiotic prophase; may be involved in chromosome pairing and recombination [RGD].	NM_012810	198164611	197989616	174995	572	43	367	15	64.2	198164148	198164720
Cap	3513	chr7	139768133	139768660	527	3.07	chr7:139768330-139768629	Scn8a	ICP	+	Intragenic	82300	-25811	sodium channel, voltage-gated, type 8, alpha	NP_062139	tetrodotoxin-sensitive sodium channel alpha subunit [RGD].	NM_019266	139686179	139794290	108111	299	25	176	16.7	58.9	139768330	139768629
Cap	77	chr1	96120443	96121187	744	3.08	chr1:96120439-96121170				Unknown										731	49	427	13.4	58.4	96120439	96121170
Cap	634	chr10	109733023	109733546	523	3.08	chr10:109733039-109733313				Unknown										274	21	178	15.3	65	109733039	109733313
Cap	1473	chr15	35566289	35566914	625	3.08	chr15:35566526-35566748				Unknown										222	16	126	14.4	56.8	35566526	35566748
Cap	2450	chr3	3610029	3610645	616	3.08	chr3:3610149-3610405	Abca2	HCP	+	Intragenic	14855	-5043	ATP-binding cassette, sub-family A (ABC1),	NP_077372	glycosylated ABC transporter that binds ATP in the presence of magnesium; may play an important role in brain function [RGD].	NM_024396	3595422	3615320	19898	256	19	167	14.8	65.2	3610149	3610405
Cap	904	chr11	76363197	76363811	614	3.09	chr11:76363409-76363683				Unknown										274	31	212	22.6	77.4	76363409	76363683
Cap	2782	chr4	174263633	174264253	620	3.09	chr4:174263724-174263992				Unknown										268	21	158	15.7	59	174263724	174263992
Cap	3042	chr5	158406005	158406729	724	3.09	chr5:158406248-158406461				Unknown										213	17	130	16	61	158406248	158406461
Cap	146	chr1	264957058	264957807	749	3.1	chr1:264957267-264957549	LOC361776	ICP	+	Intragenic	19110	-24212	hypothetical protein LOC361776	NP_001014191		NM_001014169	264938298	264981620	43322	282	20	160	14.2	56.7	264957267	264957549
Cap	76	chr1	95950237	95950772	535	3.1	chr1:95950363-95950621	Tulp2	LCP	+	Promoter	-4843	-43040	tubby-like protein 2	NP_001012168		NM_001012168	95955335	95993532	38197	258	19	163	14.7	63.2	95950363	95950621
Cap	1344	chr14	81765822	81766443	621	3.1	chr14:81766059-81766268				Unknown										209	16	119	15.3	56.9	81766059	81766268
Cap	1605	chr16	86124871	86125590	719	3.1	chr16:86125063-86125372				Unknown										309	25	185	16.2	59.9	86125063	86125372
Cap	1951	chr19	52920994	52921703	709	3.1	chr19:52921212-52921460				Unknown										248	22	167	17.7	67.3	52921212	52921460
Cap	2048	chr2	43359060	43359580	520	3.1	chr2:43359264-43359547				Unknown										283	26	172	18.4	60.8	43359264	43359547
Cap	2502	chr3	159982273	159982513	240	3.1	chr3:159982017-159982271				Unknown										254	18	156	14.2	61.4	159982017	159982271
Cap	3880	chr9	10022763	10023389	626	3.1	chr9:10022909-10023121	Klc4	ICP	-	Promoter	-7283	-20816	kinesin light chain 4	NP_001009601		NM_001009601	10015732	10002199	13533	212	22	132	20.8	62.3	10022909	10023121
Cap	603	chr10	87544399	87544919	520	3.11	chr10:87544393-87544691	Thra	LCP	+	Downstream	18283	2238	c-erbA-alpha2 isoform TRalpha2	NP_112396	binds the promoter of the Na+/H+ exchanger NHE1 and mediates thyroid hormone induced transcriptional activation [RGD].	NM_031134	87526259	87542304	16045	298	22	173	14.8	58.1	87544393	87544691
Cap	2295	chr20	12456421	12457136	715	3.11	chr20:12456569-12456968				Unknown										399	31	232	15.5	58.1	12456569	12456968
Cap	2325	chr20	49113053	49113623	570	3.11	chr20:49113278-49113514	Prep	HCP	+	Intragenic	88480	-31274	prolyl endopeptidase	NP_112614	may play a role in neuropeptide catabolism; expressed in brain; most enzyme activity is localized to the cytosolic fraction [RGD].	NM_031324	49024916	49144670	119754	236	17	133	14.4	56.4	49113278	49113514
Cap	228	chr1	80160730	80162197	1467	3.12	chr1:80161639-80161920	Dmrtc2	ICP	+	Degenerate_Promoter	2	-7177	doublesex and mab-3 related transcription factor	NP_001102610		NM_001109140	80161777	80168956	7179	281	22	171	15.7	60.9	80161639	80161920
Cap	228	chr1	80160730	80162197	1467	3.12	chr1:80161639-80161920	Lypd4	ICP	-	Degenerate_Promoter	-300	-5850	Ly6/Plaur domain containing 4	NP_001103765		NM_001110295	80161479	80155929	5550	281	22	171	15.7	60.9	80161639	80161920
Cap	1322	chr14	7962824	7963148	324	3.12	chr14:7962490-7963127	Mapk10	ICP	+	Intragenic	243214	-47886	mitogen activated protein kinase 10	NP_036938	a stress-activated protein kinase [RGD].	NM_012806	7719594	8010694	291100	637	52	368	16.3	57.8	7962490	7963127
Cap	1940	chr19	42420300	42421013	713	3.12	chr19:42420531-42420748				Unknown										217	16	115	14.7	53	42420531	42420748
Cap	2280	chr20	5351453	5352091	638	3.12	chr20:5351575-5351810	Itpr3	HCP	+	Intragenic	59263	-5808	inositol 1,4,5-triphosphate receptor 3	NP_037270	receptor for Inositol 1,4,5-trisphosphate (IP3); involved in second messenger signaling [RGD]. Publication Note: This RefSeq record includes a subset of the publications that are available for this gene. Please see the Entrez Gene record to access additional publications.	NM_013138	5292429	5357500	65071	235	17	154	14.5	65.5	5351575	5351810
Cap	3490	chr7	127462364	127462980	616	3.12	chr7:127462546-127462861				Unknown										315	22	201	14	63.8	127462546	127462861
Cap	3884	chr9	32921300	32923055	1755	3.12	chr9:32921295-32923219	Dst	LCP	+	Intragenic	164704	-129018	dystonin	NP_001101678		NM_001108208	32757553	33051275	293722	1924	128	1116	13.3	58	32921295	32923219
Cap	1588	chr16	50574829	50575547	718	3.13	chr16:50575069-50575285				Unknown										216	17	118	15.7	54.6	50575069	50575285
Cap	1720	chr17	94851618	94852338	720	3.13	chr17:94851802-94852126				Unknown										324	23	185	14.2	57.1	94851802	94852126
Cap	2056	chr2	114891007	114891446	439	3.13	chr2:114891014-114891217	Evi1	ICP	-	Promoter	-8439	-76707	ecotropic viral integration site 1	NP_001099893		NM_001106423	114882676	114814408	68268	203	18	114	17.7	56.2	114891014	114891217
Cap	2784	chr4	176720115	176720639	524	3.13	chr4:176720346-176720577	Pik3c2g	ICP	+	Intragenic	8261	-353633	phosphatidylinositol 3-kinase, C2 domain	NP_446375	catalyzes the addition of a phosphate group to the 3' position for phosphotidylinositol and PtdIns 4-P substrates, but not for PtdIns 4,5-P2 [RGD].	NM_053923	176712200	177074094	361894	231	21	135	18.2	58.4	176720346	176720577
Cap	3672	chr8	4943646	4944178	532	3.13	chr8:4943654-4943949				Unknown										295	20	169	13.6	57.3	4943654	4943949
Cap	92	chr1	134549222	134549842	620	3.14	chr1:134549359-134549588	Det1	ICP	-	Downstream	16597	2764	de-etiolated homolog 1	NP_001032271		NM_001037194	134566070	134552237	13833	229	18	132	15.7	57.6	134549359	134549588
Cap	1569	chr16	6606855	6607573	718	3.14	chr16:6606955-6607451				Unknown										496	37	311	14.9	62.7	6606955	6607451
Cap	2783	chr4	174395239	174395860	621	3.14	chr4:174395362-174395563	Ptpro	ICP	+	Intragenic	19067	-191232	protein tyrosine phosphatase, receptor type, O	NP_059032	may regulate glomerular epithelial cell function; may play a role in neural cell development [RGD].	NM_017336	174376395	174586694	210299	201	15	110	14.9	54.7	174395362	174395563
Cap	3295	chr6	21594696	21595407	711	3.14	chr6:21594887-21595194	Xdh	LCP	+	Downstream	177356	5025	xanthine dehydrogenase	NP_058850	catalyzes the conversion of xanthine + NAD+ + H2O to urate + NADH + H+; may be involved in response to aluminium and aluminium toxicity [RGD]. Publication Note: This RefSeq record includes a subset of the publications that are available for this gene. Please see the Entrez Gene record to access additional publications.	NM_017154	21417684	21590015	172331	307	23	162	15	52.8	21594887	21595194
Cap	48	chr1	80394417	80395133	716	3.15	chr1:80394416-80395122	Zfp574	HCP	+	Intragenic	4417	-829	zinc finger protein 574	NP_001019429		NM_001024258	80390352	80395598	5246	706	46	458	13	64.9	80394416	80395122
Cap	569	chr10	20939548	20940268	720	3.15	chr10:20939691-20940103				Unknown										412	32	245	15.5	59.5	20939691	20940103
Cap	575	chr10	35049877	35050601	724	3.15	chr10:35050001-35050415				Unknown										414	42	261	20.3	63	35050001	35050415
Cap	614	chr10	95712469	95713089	620	3.15	chr10:95712697-95712907	Cd79b	LCP	-	Promoter	-6527	-9673	CD79B antigen	NP_598217	B-cell-specific membrane protein [RGD].	NM_133533	95706275	95703129	3146	210	20	124	19	59	95712697	95712907
Cap	1794	chr18	228997	229235	238	3.15	chr18:228739-228985				Unknown										246	20	133	16.3	54.1	228739	228985
Cap	2055	chr2	107336559	107337133	574	3.15	chr2:107336777-107336983				Unknown										206	20	131	19.4	63.6	107336777	107336983
Cap	2304	chr20	14801560	14802080	520	3.15	chr20:14801580-14801839				Unknown										259	19	147	14.7	56.8	14801580	14801839
Cap	3284	chr6	1397000	1397519	519	3.15	chr6:1397002-1397246				Unknown										244	18	137	14.8	56.1	1397002	1397246
Cap	3496	chr7	132860553	132861285	732	3.15	chr7:132860790-132861003				Unknown										213	19	113	17.8	53.1	132860790	132861003
Cap	2477	chr3	116730108	116730627	519	3.16	chr3:116730311-116730584	Chchd5	HCP	+	Promoter	-4004	-4959	coiled-coil-helix-coiled-coil-helix domain	NP_001099979		NM_001106509	116734451	116735406	955	273	20	158	14.7	57.9	116730311	116730584
Cap	3323	chr6	138512749	138513403	654	3.16	chr6:138512961-138513228				Unknown										267	18	150	13.5	56.2	138512961	138513228
Cap	3466	chr7	111405501	111406219	718	3.16	chr7:111405731-111405964	Gpr20	LCP	-	Promoter	594	-468	G protein-coupled receptor 20	NP_071552	a nucleotide receptor and may be a homolog of the human pyrimidinoceptor [RGD].	NM_022216	111406441	111405379	1062	233	18	148	15.5	63.5	111405731	111405964
Cap	3673	chr8	11812365	11812893	528	3.16	chr8:11812416-11812629				Unknown										213	19	125	17.8	58.7	11812416	11812629
Cap	134	chr1	230835479	230835993	514	3.17	chr1:230835374-230836254	Kcnv2	LCP	+	Promoter	932	-13471	potassium channel, subfamily V, member 2	NP_001099840		NM_001106370	230834882	230849285	14403	880	60	555	13.6	63.1	230835374	230836254
Cap	1029	chr12	35309221	35309935	714	3.17	chr12:35309462-35309665	Atp2a2	HCP	+	Intragenic	42964	-6674	ATPase, Ca++ transporting, cardiac muscle, slow	NP_001103609	sarco(endo)plasmic reticulum Ca(2+) ATPase; involved in calcium transport and cycling in the heart and in calcium sequestering in enamel forming cells [RGD].	NM_001110139	35266599	35316237	49638	203	18	128	17.7	63.1	35309462	35309665
Cap	1936	chr19	38782914	38783554	640	3.17	chr19:38782933-38783385				Unknown										452	38	280	16.8	61.9	38782933	38783385
Cap	3722	chr8	125034160	125034776	616	3.17	chr8:125034234-125034523				Unknown										289	24	169	16.6	58.5	125034234	125034523
Cap	612	chr10	95365993	95366516	523	3.18	chr10:95366134-95366344	Ace	HCP	+	Intragenic	4902	-15216	angiotensin I-converting enzyme	NP_036676	catalyzes the conversion of angiotensin I to angiotensin II; plays a role in regulation of blood pressure [RGD]. Publication Note: This RefSeq record includes a subset of the publications that are available for this gene. Please see the Entrez Gene record to access additional publications.	NM_012544	95361337	95381455	20118	210	15	128	14.3	61	95366134	95366344
Cap	708	chr10	45252168	45253433	1265	3.18	chr10:45253016-45253396	Hist3h2bb	HCP	-	Degenerate_Promoter	-7524	-8272	histone cluster 3, H2bb	NP_001103111		NM_001109641	45245682	45244934	748	380	37	235	19.5	61.8	45253016	45253396
Cap	708	chr10	45252168	45253433	1265	3.18	chr10:45253016-45253396	LOC691496	ICP	+	Degenerate_Promoter	214	-197	hypothetical protein LOC691496	NP_001103112		NM_001109642	45252992	45253403	411	380	37	235	19.5	61.8	45253016	45253396
Cap	1404	chr14	33458786	33459692	906	3.18	chr14:33459295-33459496	Arl9	HCP	-	Promoter	-117	-7123	ADP-ribosylation factor-like 9	NP_997624	has similarity to the RAB subfamily of GTPases [RGD].	NM_212459	33459278	33452272	7006	201	20	126	19.9	62.7	33459295	33459496
Cap	1812	chr18	29678331	29678986	655	3.18	chr18:29678382-29678867	Pcdha4	ICP	+	Promoter	-4853	-249406	protocadherin alpha 4	NP_446385	binds dental epithelial and mesenchymal cells; may play a role in enamel and dentin formation during incisor development [RGD].	NM_053933	29683477	29928030	244553	485	32	299	13.2	61.6	29678382	29678867
Cap	3508	chr7	137344065	137344599	534	3.18	chr7:137344311-137344512				Unknown										201	18	118	17.9	58.7	137344311	137344512
Cap	3678	chr8	20260235	20260864	629	3.18	chr8:20260464-20260706				Unknown										242	20	142	16.5	58.7	20260464	20260706
Cap	18	chr1	45590305	45591019	714	3.19	chr1:45590543-45590765	Pabpc3	ICP	+	Promoter	287	-2863	poly(A) binding protein, cytoplasmic 3	NP_001099678		NM_001106208	45590367	45593517	3150	222	20	136	18	61.3	45590543	45590765
Cap	1602	chr16	81951898	81952638	740	3.19	chr16:81952122-81952354				Unknown										232	21	145	18.1	62.5	81952122	81952354
Cap	2775	chr4	136045105	136045824	719	3.19	chr4:136045352-136045554				Unknown										202	20	129	19.8	63.9	136045352	136045554
Cap	136	chr1	241960690	241961214	524	3.2	chr1:241960740-241960955	Exoc6	ICP	-	Downstream	47569	3199	exocyst complex component 6	NP_062150	component of the complex of proteins involved in secretion [RGD]. Sequence Note: The sequence AF032668.1 is from a chimeric clone. Only the exocyst complex component 6 sequence was propagated into this RefSeq record.	NM_019277	242008416	241964046	44370	215	22	136	20.5	63.3	241960740	241960955
Cap	1589	chr16	54754927	54755462	535	3.2	chr16:54754966-54755205				Unknown										239	18	132	15.1	55.2	54754966	54755205
Cap	3721	chr8	124935610	124936545	935	3.2	chr8:124935733-124935958				Unknown										225	23	145	20.4	64.4	124935733	124935958
Cap	3721	chr8	124935610	124936545	935	3.2	chr8:124936413-124936705				Unknown										292	22	179	15.1	61.3	124936413	124936705
Cap	426	chr1	189588884	189590560	1676	3.21	chr1:189588018-189589572	Fgfr2	HCP	-	Promoter	484	-105821	fibroblast growth factor receptor 2 isoform a	NP_036844	may play a role in mesodermal cell differentiation [RGD]. Publication Note: This RefSeq record includes a subset of the publications that are available for this gene. Please see the Entrez Gene record to access additional publications.	NM_012712	189589279	189482974	106305	1554	135	981	17.4	63.1	189588018	189589572
Cap	1793	chr18	226527	227059	532	3.21	chr18:226764-226978				Unknown										214	16	122	15	57	226764	226978
Cap	2506	chr3	160557992	160558616	624	3.22	chr3:160558084-160558406				Unknown										322	23	175	14.3	54.3	160558084	160558406
Cap	3434	chr7	10859168	10859877	709	3.22	chr7:10859327-10859696				Unknown										369	26	252	14.1	68.3	10859327	10859696
Cap	3501	chr7	134543019	134543741	722	3.22	chr7:134543249-134543475	Tmem16f	HCP	+	Intragenic	108588	-80764	transmembrane protein 16F	NP_001101578		NM_001108108	134434774	134624126	189352	226	19	119	16.8	52.7	134543249	134543475
Cap	4037	chr9	108511811	108513225	1414	3.22	chr9:108513103-108513338	Zfp161	ICP	+	Promoter	411	-937	zinc finger protein 161	NP_758828	mouse homolog has growth inhibiting activity and may act as a transcriptional repressor of c-myc [RGD].	NM_172325	108512809	108514157	1348	235	17	126	14.5	53.6	108513103	108513338
Cap	1840	chr18	79389304	79390018	714	3.23	chr18:79389531-79389762				Unknown										231	16	124	13.9	53.7	79389531	79389762
Cap	1938	chr19	40105535	40106249	714	3.23	chr19:40105725-40106038	RGD1309394	HCP	+	Intragenic	3595	-3237	hypothetical protein LOC292016	NP_001099656		NM_001106186	40102286	40109118	6832	313	23	185	14.7	59.1	40105725	40106038
Cap	3032	chr5	152315637	152316156	519	3.23	chr5:152315667-152315873	Ppp1r8	HCP	+	Intragenic	9835	-7305	protein phosphatase 1, regulatory (inhibitor)	NP_001101381		NM_001107911	152305935	152323075	17140	206	18	124	17.5	60.2	152315667	152315873
Cap	3309	chr6	106514064	106514743	679	3.23	chr6:106514288-106514526				Unknown										238	16	149	13.4	62.6	106514288	106514526
Cap	141	chr1	253426346	253426872	526	3.24	chr1:253426368-253426643				Unknown										275	20	172	14.5	62.5	253426368	253426643
Cap	27	chr1	72880034	72880273	239	3.24	chr1:72879171-72880262	Ube2m	HCP	+	Promoter	-5950	-9488	ubiquitin-conjugating enzyme E2M (UBC12 homolog,	NP_001101941		NM_001108471	72885666	72889204	3538	1091	122	738	22.4	67.6	72879171	72880262
Cap	1090	chr12	16829920	16830909	989	3.24	chr12:16829643-16829847	Il3ra	LCP	-	Promoter	290	-4043	interleukin 3 receptor, alpha chain	NP_640353	a putative cytokine receptor expressed in testis,lung and spleen [RGD].	NM_139260	16830035	16825702	4333	204	22	136	21.6	66.7	16829643	16829847
Cap	1462	chr15	10928083	10928712	629	3.24	chr15:10928217-10928443				Unknown										226	16	128	14.2	56.6	10928217	10928443
Cap	3888	chr9	35194162	35194784	622	3.24	chr9:35194273-35194739				Unknown										466	44	308	18.9	66.1	35194273	35194739
Cap	3896	chr9	74662048	74662757	709	3.24	chr9:74662259-74662521	LOC363256	ICP	+	Intragenic	9865	-47514	hypothetical protein LOC363256	NP_001102272		NM_001108802	74652525	74709904	57379	262	21	176	16	67.2	74662259	74662521
Cap	568	chr10	19590373	19591002	629	3.25	chr10:19590577-19590867				Unknown										290	23	152	15.9	52.4	19590577	19590867
Cap	2487	chr3	145882513	145883249	736	3.25	chr3:145882709-145882998				Unknown										289	29	199	20.1	68.9	145882709	145882998
Cap	3038	chr5	156813209	156813874	665	3.25	chr5:156813438-156813642	Eif4g3	ICP	+	Intragenic	3923	-165709	eukaryotic translation initiation factor 4	NP_001100163		NM_001106693	156809617	156979249	169632	204	22	148	21.6	72.5	156813438	156813642
Cap	1704	chr17	22399668	22400386	718	3.26	chr17:22399906-22400110				Unknown										204	14	110	13.7	53.9	22399906	22400110
Cap	1319	chr14	7229304	7229738	434	3.27	chr14:7229488-7229816	LOC498330	ICP	+	Intragenic	7362	-643	hypothetical protein LOC498330	NP_001017495		NM_001017495	7222290	7230295	8005	328	23	182	14	55.5	7229488	7229816
Cap	1595	chr16	70030796	70031326	530	3.27	chr16:70030897-70031098				Unknown										201	14	105	13.9	52.2	70030897	70031098
Cap	1719	chr17	94818857	94819477	620	3.27	chr17:94819040-94819371				Unknown										331	24	203	14.5	61.3	94819040	94819371
Cap	2449	chr3	3591909	3592623	714	3.27	chr3:3592075-3592438	Abca2	HCP	+	Promoter	-3166	-23064	ATP-binding cassette, sub-family A (ABC1),	NP_077372	glycosylated ABC transporter that binds ATP in the presence of magnesium; may play an important role in brain function [RGD].	NM_024396	3595422	3615320	19898	363	25	218	13.8	60.1	3592075	3592438
Cap	3697	chr8	109098518	109099236	718	3.27	chr8:109098742-109098988				Unknown										246	18	149	14.6	60.6	109098742	109098988
Cap	3881	chr9	11470817	11471526	709	3.27	chr9:11471058-11471262				Unknown										204	15	119	14.7	58.3	11471058	11471262
Cap	565	chr10	14638664	14639303	639	3.28	chr10:14638896-14639129				Unknown										233	19	149	16.3	63.9	14638896	14639129
Cap	1590	chr16	59780547	59781261	714	3.28	chr16:59780737-59781049				Unknown										312	25	200	16	64.1	59780737	59781049
Cap	1826	chr18	52311043	52311570	527	3.28	chr18:52311290-52311494				Unknown										204	15	111	14.7	54.4	52311290	52311494
Cap	3892	chr9	42760767	42761476	709	3.28	chr9:42760920-42761296	Nck2	HCP	+	Intragenic	110848	-15859	non-catalytic region of tyrosine kinase adaptor	NP_001101686		NM_001108216	42650260	42776967	126707	376	26	231	13.8	61.4	42760920	42761296
Cap	582	chr10	45252865	45253298	433	3.29	chr10:45253016-45253396	Hist3h2bb	HCP	-	Degenerate_Promoter	-7524	-8272	histone cluster 3, H2bb	NP_001103111		NM_001109641	45245682	45244934	748	380	37	235	19.5	61.8	45253016	45253396
Cap	582	chr10	45252865	45253298	433	3.29	chr10:45253016-45253396	LOC691496	ICP	+	Degenerate_Promoter	214	-197	hypothetical protein LOC691496	NP_001103112		NM_001109642	45252992	45253403	411	380	37	235	19.5	61.8	45253016	45253396
Cap	1696	chr17	12540817	12541436	619	3.29	chr17:12541004-12541328				Unknown										324	26	188	16	58	12541004	12541328
Cap	1935	chr19	38776156	38777060	904	3.29	chr19:38776055-38777097				Unknown										1042	74	619	14.2	59.4	38776055	38777097
Cap	3464	chr7	110792973	110793687	714	3.29	chr7:110793174-110793459				Unknown										285	24	167	16.8	58.6	110793174	110793459
Cap	1041	chr12	43030979	43031700	721	3.3	chr12:43031208-43031444				Unknown										236	18	131	15.3	55.5	43031208	43031444
Cap	1345	chr14	83070698	83071327	629	3.3	chr14:83070896-83071102				Unknown										206	15	127	14.6	61.7	83070896	83071102
Cap	1378	chr14	13632549	13633092	543	3.3	chr14:13632998-13633457	LOC289482	ICP	+	Promoter	173	-9863	ARD1 homolog B	NP_001019913		NM_001024742	13633054	13643090	10036	459	38	297	16.6	64.7	13632998	13633457
Cap	2081	chr2	200716976	200717689	713	3.3	chr2:200717173-200717473	Kcnd3	HCP	+	Intragenic	7546	-207241	potassium voltage gated channel, Shal-related	NP_113927	voltage-gated K+ channel that generates an A type K+ current [RGD]. Publication Note: This RefSeq record includes a subset of the publications that are available for this gene. Please see the Entrez Gene record to access additional publications.	NM_031739	200709777	200924564	214787	300	24	180	16	60	200717173	200717473
Cap	2755	chr4	62313812	62314426	614	3.3	chr4:62313837-62314281	Wdr91	HCP	-	Promoter	-10048	-48863	WD repeat domain 91	NP_001120770		NM_001127298	62304011	62265196	38815	444	31	245	14	55.2	62313837	62314281
Cap	3345	chr6	25413592	25414607	1015	3.3	chr6:25414703-25414974	Abhd1	ICP	-	Degenerate_Promoter	-4357	-9346	abhydrolase domain containing 1	NP_001008520		NM_001008520	25410481	25405492	4989	271	35	211	25.8	77.9	25414703	25414974
Cap	3345	chr6	25413592	25414607	1015	3.3	chr6:25414703-25414974	Cgref1	ICP	+	Degenerate_Promoter	-51	-11979	cell growth regulator with EF hand domain 1	NP_620787	inhibits cell growth [RGD].	NM_139087	25414889	25426817	11928	271	35	211	25.8	77.9	25414703	25414974
Cap	3469	chr7	114036342	114036861	519	3.3	chr7:114036399-114036776	Mapk15	LCP	+	Downstream	9894	4580	mitogen-activated protein kinase 15	NP_775453	activity; localization, and function is regulated by the C-terminal tail [RGD].	NM_173331	114026693	114032007	5314	377	29	248	15.4	65.8	114036399	114036776
Cap	3676	chr8	19928725	19929344	619	3.3	chr8:19928749-19929192	Eif3g	ICP	-	Promoter	-8853	-13338	eukaryotic translation initiation factor 3,	NP_001013113		NM_001013095	19920117	19915632	4485	443	31	274	14	61.9	19928749	19929192
Cap	5	chr1	6113762	6114476	714	3.31	chr1:6113946-6114259				Unknown										313	25	160	16	51.1	6113946	6114259
Cap	185	chr1	45590205	45590832	627	3.31	chr1:45590543-45590765	Pabpc3	ICP	+	Promoter	287	-2863	poly(A) binding protein, cytoplasmic 3	NP_001099678		NM_001106208	45590367	45593517	3150	222	20	136	18	61.3	45590543	45590765
Cap	621	chr10	100514380	100514989	609	3.31	chr10:100514517-100514923	Kcnj16	ICP	+	Promoter	541	-1228	potassium inwardly-rectifying channel J16	NP_445766	inward rectifying potassium channel; may be involved in renal pH regulation [RGD].	NM_053314	100514179	100515948	1769	406	30	228	14.8	56.2	100514517	100514923
Cap	3482	chr7	118455144	118456048	904	3.31	chr7:118454928-118455481	Mgat3	LCP	+	Intragenic	25455	-1921	mannoside acetyl glucosaminyltransferase 3	NP_062112	enzyme that catalyzes the addition of N-acetylglucosamine to the beta-linked mannose of the trimannosyl core of N-linked sugar chains [RGD]. Sequence Note: The RefSeq transcript and protein were derived from genomic sequence to make the sequence consistent with the reference genome assembly. The genomic coordinates used for the transcript record were based on alignments.	NM_019239	118429749	118457125	27376	553	42	346	15.2	62.6	118454928	118455481
Cap	3482	chr7	118455144	118456048	904	3.31	chr7:118455640-118455914	Mgat3	LCP	+	Intragenic	26028	-1348	mannoside acetyl glucosaminyltransferase 3	NP_062112	enzyme that catalyzes the addition of N-acetylglucosamine to the beta-linked mannose of the trimannosyl core of N-linked sugar chains [RGD]. Sequence Note: The RefSeq transcript and protein were derived from genomic sequence to make the sequence consistent with the reference genome assembly. The genomic coordinates used for the transcript record were based on alignments.	NM_019239	118429749	118457125	27376	274	21	167	15.3	60.9	118455640	118455914
Cap	17	chr1	41551319	41552059	740	3.32	chr1:41551543-41551779	Fndc1	ICP	+	Intragenic	29643	-31694	fibronectin type III domain containing 1	NP_001033704		NM_001038615	41522018	41583355	61337	236	18	155	15.3	65.7	41551543	41551779
Cap	1331	chr14	17587675	17588417	742	3.32	chr14:17587913-17588116	G3bp2	HCP	+	Intragenic	31048	-242	GTPase activating protein (SH3 domain) binding	NP_001014011		NM_001013989	17556966	17588256	31290	203	15	122	14.8	60.1	17587913	17588116
Cap	1695	chr17	12525758	12526283	525	3.32	chr17:12525961-12526237				Unknown										276	22	170	15.9	61.6	12525961	12526237
Cap	3047	chr5	160370300	160371014	714	3.32	chr5:160370386-160370901				Unknown										515	36	287	14	55.7	160370386	160370901
Cap	557	chr10	11820898	11821482	584	3.33	chr10:11820997-11821288				Unknown										291	27	203	18.6	69.8	11820997	11821288
Cap	2495	chr3	155414233	155414869	636	3.33	chr3:155414423-155414734				Unknown										311	25	193	16.1	62.1	155414423	155414734
Cap	106	chr1	174116065	174116795	730	3.34	chr1:174116250-174116565				Unknown										315	21	191	13.3	60.6	174116250	174116565
Cap	1042	chr12	43097196	43097870	674	3.34	chr12:43097412-43097662				Unknown										250	27	183	21.6	73.2	43097412	43097662
Cap	1465	chr15	18990887	18991601	714	3.34	chr15:18991086-18991367				Unknown										281	22	156	15.7	55.5	18991086	18991367
Cap	2490	chr3	147165639	147166378	739	3.34	chr3:147165859-147166108	Dlgap4	LCP	+	Intragenic	84762	-10041	discs, large homolog-associated protein 4	NP_775168	binds neuronal cell guanylate kinase PSD-95/SAP90; may play a role in post synaptic density structure and synaptic function [RGD].	NM_173145	147081221	147176024	94803	249	18	143	14.5	57.4	147165859	147166108
Cap	3910	chr9	108512871	108513589	718	3.34	chr9:108513103-108513338	Zfp161	ICP	+	Promoter	411	-937	zinc finger protein 161	NP_758828	mouse homolog has growth inhibiting activity and may act as a transcriptional repressor of c-myc [RGD].	NM_172325	108512809	108514157	1348	235	17	126	14.5	53.6	108513103	108513338
Cap	144	chr1	263692202	263692826	624	3.35	chr1:263692329-263692582				Unknown										253	19	144	15	56.9	263692329	263692582
Cap	1166	chr13	70402088	70402833	745	3.35	chr13:70402312-70402557				Unknown										245	18	148	14.7	60.4	70402312	70402557
Cap	1789	chr18	125311	126777	1466	3.35	chr18:125388-125926	F8	LCP	+	Intragenic	4524	-36351	coagulation factor VIII	NP_899160	human homolog is a cofactor for factor IXa; involved in blood coagulation [RGD].	NM_183331	121133	162008	40875	538	42	311	15.6	57.8	125388	125926
Cap	1789	chr18	125311	126777	1466	3.35	chr18:126257-126507	F8	LCP	+	Intragenic	5249	-35626	coagulation factor VIII	NP_899160	human homolog is a cofactor for factor IXa; involved in blood coagulation [RGD].	NM_183331	121133	162008	40875	250	24	147	19.2	58.8	126257	126507
Cap	2299	chr20	13816940	13817464	524	3.35	chr20:13816861-13817335				Unknown										474	32	284	13.5	59.9	13816861	13817335
Cap	2497	chr3	156862294	156863004	710	3.36	chr3:156862502-156862751				Unknown										249	19	140	15.3	56.2	156862502	156862751
Cap	1173	chr13	93314818	93315529	711	3.37	chr13:93315053-93315275				Unknown										222	17	144	15.3	64.9	93315053	93315275
Cap	2780	chr4	172723103	172723812	709	3.37	chr4:172723229-172723662				Unknown										433	32	246	14.8	56.8	172723229	172723662
Cap	3033	chr5	154208755	154209475	720	3.37	chr5:154208964-154209246	Rcan3	ICP	-	Downstream	8263	-31	regulator of calcineurin 3	NP_001012764		NM_001012746	154217368	154209074	8294	282	24	180	17	63.8	154208964	154209246
Cap	2758	chr4	76184757	76185466	709	3.38	chr4:76184892-76185303				Unknown										411	30	249	14.6	60.6	76184892	76185303
Cap	1005	chr12	14577887	14578605	718	3.39	chr12:14577942-14578528				Unknown										586	45	356	15.4	60.8	14577942	14578528
Cap	2343	chr20	2991206	2992234	1028	3.39	chr20:2992307-2992540	Ppp1r10	HCP	-	Degenerate_Promoter	-8026	-21744	protein phosphatase 1, regulatory subunit 10	NP_075240	functions as nuclear targeting subunit and potent modulator of phosphatase 1 (PP1), a key mediator nuclear processes [RGD].	NM_022951	2984397	2970679	13718	233	25	154	21.5	66.1	2992307	2992540
Cap	2343	chr20	2991206	2992234	1028	3.39	chr20:2992307-2992540	RGD1303066	ICP	+	Degenerate_Promoter	19	-12933	hypothetical protein LOC361789	NP_997663		NM_212498	2992404	3005356	12952	233	25	154	21.5	66.1	2992307	2992540
Cap	2787	chr4	184707543	184708257	714	3.39	chr4:184707740-184707988	Klhdc5	HCP	+	Intragenic	18939	-1995	kelch domain containing 5	NP_001102727		NM_001109257	184688925	184709859	20934	248	18	144	14.5	58.1	184707740	184707988
Cap	133	chr1	228843895	228844605	710	3.4	chr1:228844088-228844390				Unknown										302	24	187	15.9	61.9	228844088	228844390
Cap	894	chr11	45785271	45785956	685	3.4	chr11:45785511-45785725	Nfkbiz	HCP	+	Intragenic	9592	-25897	nuclear factor of kappa light polypeptide gene	NP_001100565		NM_001107095	45776026	45811515	35489	214	16	119	15	55.6	45785511	45785725
Cap	1045	chr12	44624773	44625482	709	3.4	chr12:44624979-44625251				Unknown										272	26	166	19.1	61	44624979	44625251
Cap	1467	chr15	23749341	23750051	710	3.4	chr15:23749502-23749870				Unknown										368	27	235	14.7	63.9	23749502	23749870
Cap	3061	chr5	168229210	168229927	717	3.4	chr5:168229410-168229707				Unknown										297	21	190	14.1	64	168229410	168229707
Cap	4051	chrUn	25175142	25175756	614	3.4	chrUn:25175254-25175523				Unknown										269	25	178	18.6	66.2	25175254	25175523
Cap	1466	chr15	22824613	22825317	704	3.41	chr15:22824793-22825053				Unknown										260	20	144	15.4	55.4	22824793	22825053
Cap	1576	chr16	19019947	19020760	813	3.41	chr16:19020226-19021641				Unknown										1415	98	924	13.9	65.3	19020226	19021641
Cap	1576	chr16	19019947	19020760	813	3.41	chr16:19019899-19020120				Unknown										221	17	143	15.4	64.7	19019899	19020120
Cap	2087	chr2	228448449	228449063	614	3.41	chr2:228448680-228448906				Unknown										226	17	122	15	54	228448680	228448906
Cap	1713	chr17	77594632	77595255	623	3.42	chr17:77594766-77595008	Calml3	LCP	+	Promoter	374	-1001	calmodulin-like 3	NP_001012054		NM_001012054	77594513	77595888	1375	242	21	142	17.4	58.7	77594766	77595008
Cap	2234	chr2	204671283	204672094	811	3.42	chr2:204671544-204671755	LOC691448	ICP	+	Promoter	-32	-45341	hypothetical protein LOC691448	NP_001103110		NM_001109640	204671681	204716990	45309	211	17	139	16.1	65.9	204671544	204671755
Cap	62	chr1	89231733	89232447	714	3.43	chr1:89231953-89232194	Tshz3	LCP	+	Intragenic	68196	-4226	teashirt zinc finger family member 3	NP_001100976		NM_001107506	89163877	89236299	72422	241	20	143	16.6	59.3	89231953	89232194
Cap	604	chr10	88237171	88237892	721	3.43	chr10:88237392-88237646				Unknown										254	21	141	16.5	55.5	88237392	88237646
Cap	1321	chr14	7900245	7900954	709	3.43	chr14:7900452-7900722	Mapk10	ICP	+	Intragenic	180993	-110107	mitogen activated protein kinase 10	NP_036938	a stress-activated protein kinase [RGD].	NM_012806	7719594	8010694	291100	270	20	150	14.8	55.6	7900452	7900722
Cap	2744	chr3_random	1609619	1610618	999	3.43	chr3_random:1609989-1611358	Gnas	HCP	+	Promoter	425	-686	GNAS (guanine nucleotide binding protein, alpha	NP_068617	This gene encodes two alternated gene products, the extra-long form of the alpha-subunit of the Gs G protein (XLalphas) and Alex protein, which are derived from two different ORFs. The Alex interacts with the XL domain of the XLalphas and inhibits its adenylyl cyclase-stimulating function. The XLalphas may play a role in cholera toxin mediated induction of secretory vesicle formation.	NM_021845	1610248	1611359	1111	1369	101	831	14.8	60.7	1609989	1611358
Cap	3695	chr8	102093349	102094069	720	3.43	chr8:102093528-102093849				Unknown										321	28	175	17.4	54.5	102093528	102093849
Cap	2296	chr20	12463376	12464091	715	3.44	chr20:12463501-12463937	Ftcd	LCP	-	Downstream	20088	6570	formiminotransferase cyclodeaminase	NP_446019	binds vimentin intermediate filaments; may regulate cytoskeletal rearrangement [RGD].	NM_053567	12483807	12470289	13518	436	36	274	16.5	62.8	12463501	12463937
Cap	2435	chr20	46577061	46578878	1817	3.44	chr20:46578260-46578574	Ostm1	ICP	+	Promoter	65	-4352	osteopetrosis associated transmembrane protein	NP_001025096		NM_001029925	46578352	46582769	4417	314	23	180	14.6	57.3	46578260	46578574
Cap	2326	chr20	49143645	49144359	714	3.44	chr20:49143803-49144178	Prep	HCP	+	Intragenic	119074	-680	prolyl endopeptidase	NP_112614	may play a role in neuropeptide catabolism; expressed in brain; most enzyme activity is localized to the cytosolic fraction [RGD].	NM_031324	49024916	49144670	119754	375	34	233	18.1	62.1	49143803	49144178
Cap	2454	chr3	4641213	4641826	613	3.44	chr3:4641452-4641653				Unknown										201	17	126	16.9	62.7	4641452	4641653
Cap	2741	chr3_random	1654317	1655030	713	3.44	chr3_random:1654556-1654758				Unknown										202	18	110	17.8	54.5	1654556	1654758
Cap	3921	chr9	8621743	8623227	1484	3.44	chr9:8623131-8623579	RGD1560271	ICP	+	Promoter	318	-18033	hypothetical protein LOC501097	NP_001102771		NM_001109301	8623037	8641388	18351	448	37	304	16.5	67.9	8623131	8623579
Cap	555	chr10	3335624	3336323	699	3.45	chr10:3335853-3336074				Unknown										221	17	124	15.4	56.1	3335853	3336074
Cap	1799	chr18	2206001	2206528	527	3.45	chr18:2206090-2206319	Mib1	HCP	+	Intragenic	100103	-18615	mindbomb homolog 1	NP_001100875		NM_001107405	2106101	2224819	118718	229	24	155	21	67.7	2206090	2206319
Cap	2750	chr4	8524776	8525524	748	3.46	chr4:8524993-8525246	Reln	LCP	+	Intragenic	374247	-84022	reelin	NP_536319	regulates neuronal cell migration during development; plays a role in locomotor behavior [RGD]. Publication Note: This RefSeq record includes a subset of the publications that are available for this gene. Please see the Entrez Gene record to access additional publications.	NM_080394	8150872	8609141	458269	253	17	150	13.4	59.3	8524993	8525246
Cap	3710	chr8	118905920	118906539	619	3.46	chr8:118905854-118906479				Unknown										625	43	367	13.8	58.7	118905854	118906479
Cap	895	chr11	58626523	58627257	734	3.47	chr11:58626693-58627050				Unknown										357	27	229	15.1	64.1	58626693	58627050
Cap	901	chr11	67197634	67198244	610	3.47	chr11:67197763-67197996	Pdia5	ICP	+	Intragenic	80131	-6601	protein disulfide isomerase-associated 5	NP_001014147		NM_001014125	67117748	67204480	86732	233	16	137	13.7	58.8	67197763	67197996
Cap	1032	chr12	38016167	38016777	610	3.47	chr12:38016290-38016505				Unknown										215	17	121	15.8	56.3	38016290	38016505
Cap	1810	chr18	29662931	29663645	714	3.47	chr18:29662902-29663669	Pcdha2	ICP	+	Promoter	-7252	-264745	protocadherin alpha 2	NP_955798	member of a family of synaptic cadherins and Reelin receptors [RGD].	NM_199504	29670537	29928030	257493	767	61	453	15.9	59.1	29662902	29663669
Cap	2301	chr20	14154768	14155383	615	3.47	chr20:14155004-14155211				Unknown										207	16	128	15.5	61.8	14155004	14155211
Cap	3720	chr8	124579314	124579869	555	3.47	chr8:124579205-124579817				Unknown										612	45	368	14.7	60.1	124579205	124579817
Cap	3883	chr9	19676641	19677260	619	3.47	chr9:19676836-19677137	Paqr8	LCP	+	Intragenic	15959	-1022	progestin and adipoQ receptor family member	NP_001014121		NM_001014099	19661027	19678008	16981	301	24	189	15.9	62.8	19676836	19677137
Cap	143	chr1	262135623	262136237	614	3.48	chr1:262135852-262136076				Unknown										224	17	119	15.2	53.1	262135852	262136076
Cap	1474	chr15	36178601	36179317	716	3.48	chr15:36178741-36179157				Unknown										416	28	242	13.5	58.2	36178741	36179157
Cap	1698	chr17	17048311	17049027	716	3.48	chr17:17048552-17048768				Unknown										216	17	130	15.7	60.2	17048552	17048768
Cap	1943	chr19	44881335	44882063	728	3.48	chr19:44881577-44881779				Unknown										202	17	102	16.8	50.5	44881577	44881779
Cap	3460	chr7	58610228	58610773	545	3.48	chr7:58610313-58610583				Unknown										270	22	161	16.3	59.6	58610313	58610583
Cap	3024	chr5	146771950	146772664	714	3.5	chr5:146772027-146772563	Gjb3	ICP	-	Promoter	321	-490	gap junction protein, beta 3	NP_062113	may play a role in hearing [RGD].	NM_019240	146772616	146771805	811	536	37	310	13.8	57.8	146772027	146772563
Cap	3915	chr9	5897983	5899044	1061	3.5	chr9:5898917-5899802	Dazl	HCP	+	Promoter	256	-16476	deleted in azoospermia-like	NP_001102884		NM_001109414	5899103	5915835	16732	885	76	607	17.2	68.6	5898917	5899802
Cap	107	chr1	180323253	180323976	723	3.51	chr1:180323488-180323714	Hs3st2	HCP	+	Intragenic	120811	-1116	heparan sulfate (glucosamine)	NP_852035	catalyzes the transfer of sulfate groups onto the 3-OH site of glucosamine groups in heparan sulfate proteoglycans [RGD].	NM_181370	180202790	180324717	121927	226	18	142	15.9	62.8	180323488	180323714
Cap	1011	chr12	21884809	21885532	723	3.51	chr12:21884845-21885459	Ywhag	HCP	+	Intragenic	25349	-2898	tyrosine 3-monooxygenase/tryptophan	NP_062249	belongs to the 14-3-3 family of proteins; mediates signal transduction via activation of protein kinase C and calcium/calmodulin-dependent protein kinase II [RGD].	NM_019376	21859803	21888050	28247	614	45	367	14.7	59.8	21884845	21885459
Cap	1599	chr16	79494284	79494908	624	3.51	chr16:79494462-79494798				Unknown										336	28	194	16.7	57.7	79494462	79494798
Cap	3037	chr5	156315619	156316333	714	3.52	chr5:156315863-156316066				Unknown										203	17	127	16.7	62.6	156315863	156316066
Cap	122	chr1	202755794	202756458	664	3.53	chr1:202756031-202756243	Tnnt3	LCP	+	Intragenic	8075	-5826	troponin T3, skeletal, fast	NP_113720	plays a role in muscle contraction [RGD].	NM_031532	202748062	202761963	13901	212	17	117	16	55.2	202756031	202756243
Cap	2990	chr5	22697957	22698669	712	3.53	chr5:22698175-22698428	Chd7	LCP	+	Intragenic	149065	-11956	chromodomain helicase DNA binding protein 7	NP_001101376		NM_001107906	22549236	22710257	161021	253	20	154	15.8	60.9	22698175	22698428
Cap	3202	chr5	146772125	146772949	824	3.53	chr5:146772027-146772563	Gjb3	ICP	-	Promoter	321	-490	gap junction protein, beta 3	NP_062113	may play a role in hearing [RGD].	NM_019240	146772616	146771805	811	536	37	310	13.8	57.8	146772027	146772563
Cap	3690	chr8	61526359	61526982	623	3.53	chr8:61526482-61526732				Unknown										250	19	149	15.2	59.6	61526482	61526732
Cap	4057	chrUn	74986088	74986798	710	3.53	chrUn:74986238-74986619				Unknown										381	31	232	16.3	60.9	74986238	74986619
Cap	633	chr10	109725550	109726269	719	3.54	chr10:109725768-109726030				Unknown										262	26	160	19.8	61.1	109725768	109726030
Cap	619	chr10	99868933	99869553	620	3.54	chr10:99869177-99869383	Map2k6	ICP	+	Intragenic	9597	-105166	mitogen-activated protein kinase kinase 6	NP_446155	activator of p38 MAPK; may play a role in cardiac hypertrophic and failure conditions [RGD].	NM_053703	99859683	99974446	114763	206	16	115	15.5	55.8	99869177	99869383
Cap	1945	chr19	48245026	48245755	729	3.54	chr19:48245271-48245476				Unknown										205	17	111	16.6	54.1	48245271	48245476
Cap	2306	chr20	19290776	19291490	714	3.54	chr20:19290961-19291284				Unknown										323	24	189	14.9	58.5	19290961	19291284
Cap	908	chr11	82457800	82458499	699	3.55	chr11:82457967-82458234				Unknown										267	21	164	15.7	61.4	82457967	82458234
Cap	1046	chr12	45546118	45546835	717	3.55	chr12:45546183-45546738				Unknown										555	37	345	13.3	62.2	45546183	45546738
Cap	1329	chr14	11320470	11321116	646	3.55	chr14:11320555-11320873				Unknown										318	26	188	16.4	59.1	11320555	11320873
Cap	1333	chr14	33459266	33459697	431	3.55	chr14:33459295-33459496	Arl9	HCP	-	Promoter	-117	-7123	ADP-ribosylation factor-like 9	NP_997624	has similarity to the RAB subfamily of GTPases [RGD].	NM_212459	33459278	33452272	7006	201	20	126	19.9	62.7	33459295	33459496
Cap	1468	chr15	24368469	24369184	715	3.55	chr15:24368671-24368923	Peli2	LCP	+	Intragenic	141064	-2445	pellino 2	NP_001100729		NM_001107259	24227733	24371242	143509	252	22	166	17.5	65.9	24368671	24368923
Cap	1328	chr14	11123438	11124058	620	3.56	chr14:11123535-11123849				Unknown										314	23	179	14.6	57	11123535	11123849
Cap	3447	chr7	16153701	16154278	577	3.56	chr7:16153576-16154211				Unknown										635	41	405	12.9	63.8	16153576	16154211
Cap	55	chr1	84804786	84805503	717	3.58	chr1:84804934-84805323				Unknown										389	35	256	18	65.8	84804934	84805323
Cap	609	chr10	92058776	92059485	709	3.58	chr10:92059016-92059222	RGD1307851	LCP	+	Intragenic	1269	-202	hypothetical protein LOC287741	NP_001013883		NM_001013861	92057850	92059321	1471	206	16	124	15.5	60.2	92059016	92059222
Cap	2052	chr2	79650260	79650889	629	3.58	chr2:79650461-79650759				Unknown										298	24	192	16.1	64.4	79650461	79650759
Cap	2323	chr20	47919344	47920066	722	3.58	chr20:47919556-47919812				Unknown										256	20	141	15.6	55.1	47919556	47919812
Cap	109	chr1	186610756	186611470	714	3.59	chr1:186610923-186611286				Unknown										363	28	225	15.4	62	186610923	186611286
Cap	1315	chr14	5104854	5105571	717	3.59	chr14:5105103-5105304				Unknown										201	18	102	17.9	50.7	5105103	5105304
Cap	3053	chr5	165914671	165915287	616	3.59	chr5:165914800-165915032				Unknown										232	18	137	15.5	59.1	165914800	165915032
Cap	1014	chr12	26165378	26166597	1219	3.6	chr12:26165371-26166548				Unknown										1177	77	720	13.1	61.2	26165371	26166548
Cap	1318	chr14	7080780	7081399	619	3.6	chr14:7080864-7081393				Unknown										529	38	313	14.4	59.2	7080864	7081393
Cap	3059	chr5	168035204	168035918	714	3.6	chr5:168035413-168035693	Errfi1	HCP	+	Downstream	22871	9592	mitogen-inducible gene 6 protein	NP_001014093		NM_001014071	168012682	168025961	13279	280	23	165	16.4	58.9	168035413	168035693
Cap	3889	chr9	36438476	36439086	610	3.6	chr9:36438714-36438920				Unknown										206	15	108	14.6	52.4	36438714	36438920
Cap	3897	chr9	74706321	74707035	714	3.6	chr9:74706566-74706775	Gmppa	ICP	+	Promoter	-6933	-14360	GDP-mannose pyrophosphorylase A	NP_001020227		NM_001025056	74713603	74721030	7427	209	19	125	18.2	59.8	74706566	74706775
Cap	2496	chr3	156209952	156210677	725	3.61	chr3:156210165-156210438				Unknown										273	21	165	15.4	60.4	156210165	156210438
Cap	3043	chr5	158463693	158464399	706	3.61	chr5:158463735-158464332				Unknown										597	45	355	15.1	59.5	158463735	158464332
Cap	1324	chr14	8203523	8204232	709	3.62	chr14:8203713-8203979				Unknown										266	20	152	15	57.1	8203713	8203979
Cap	2320	chr20	45704507	45705211	704	3.62	chr20:45704622-45705071				Unknown										449	32	250	14.3	55.7	45704622	45705071
Cap	2276	chr20	4969419	4970128	709	3.62	chr20:4969561-4969963	Rxrb	HCP	-	Promoter	-8882	-15423	retinoid X receptor beta	NP_996731	forms a dimer with the retinoic acid receptor and other nuclear receptors; enhances retinoic acid receptor, thyroid hormone receptor, and vitamin D receptor transcriptional regulation activities [RGD].	NM_206849	4960880	4954339	6541	402	28	259	13.9	64.4	4969561	4969963
Cap	3057	chr5	166549938	166550556	618	3.62	chr5:166550032-166550342				Unknown										310	21	182	13.5	58.7	166550032	166550342
Cap	3475	chr7	114960929	114961653	724	3.62	chr7:114961169-114961388	Rpl8	HCP	+	Downstream	7021	4939	ribosomal protein L8	NP_001030088	human homolog is a 60S ribosomal protein [RGD].	NM_001034916	114954257	114956339	2082	219	19	137	17.4	62.6	114961169	114961388
Cap	1023	chr12	33000716	33001340	624	3.63	chr12:33000792-33001147				Unknown										355	31	222	17.5	62.5	33000792	33001147
Cap	2072	chr2	189652845	189653374	529	3.63	chr2:189652867-189653136				Unknown										269	19	166	14.1	61.7	189652867	189653136
Cap	2510	chr3	161405725	161406366	641	3.63	chr3:161405937-161406209				Unknown										272	21	156	15.4	57.4	161405937	161406209
Cap	117	chr1	198810174	198810883	709	3.64	chr1:198810402-198810634				Unknown										232	20	147	17.2	63.4	198810402	198810634
Cap	906	chr11	82032537	82033258	721	3.64	chr11:82032773-82032996				Unknown										223	18	138	16.1	61.9	82032773	82032996
Cap	1572	chr16	9579965	9580589	624	3.64	chr16:9580201-9580421	Gdf10	LCP	+	Downstream	21582	9655	growth differentiation factor 10	NP_077351	may play a role in the central nervous system, in bone formation and remodeling [RGD].	NM_024375	9558729	9570656	11927	220	18	139	16.4	63.2	9580201	9580421
Cap	3288	chr6	10579083	10580546	1463	3.64	chr6:10579215-10579446	Socs5	ICP	+	Intragenic	27154	-3453	suppressor of cytokine signaling 5	NP_001102744		NM_001109274	10552176	10582783	30607	231	21	139	18.2	60.2	10579215	10579446
Cap	3288	chr6	10579083	10580546	1463	3.64	chr6:10580073-10580291	Socs5	ICP	+	Intragenic	28006	-2601	suppressor of cytokine signaling 5	NP_001102744		NM_001109274	10552176	10582783	30607	218	16	129	14.7	59.2	10580073	10580291
Cap	562	chr10	12876039	12877637	1598	3.65	chr10:12876282-12876494	Zscan10	LCP	+	Intragenic	8664	-1300	zinc finger and SCAN domain containing 10	NP_001100451		NM_001106981	12867724	12877688	9964	212	17	130	16	61.3	12876282	12876494
Cap	562	chr10	12876039	12877637	1598	3.65	chr10:12877020-12877522	Zscan10	LCP	+	Intragenic	9547	-417	zinc finger and SCAN domain containing 10	NP_001100451		NM_001106981	12867724	12877688	9964	502	39	323	15.5	64.3	12877020	12877522
Cap	2110	chr2	25988579	25989193	614	3.65	chr2:25988593-25988940	F2r	ICP	-	Promoter	306	-2967	coagulation factor II receptor	NP_037082	plays a role in blood coagulation, inflammatory response, and cell proliferation; mediates signal transduction via MAP kinase and other signaling pathways [RGD]. Publication Note: This RefSeq record includes a subset of the publications that are available for this gene. Please see the Entrez Gene record to access additional publications.	NM_012950	25989072	25985799	3273	347	25	201	14.4	57.9	25988593	25988940
Cap	3461	chr7	66053531	66054060	529	3.65	chr7:66053759-66053995				Unknown										236	20	137	16.9	58.1	66053759	66053995
Cap	142	chr1	253477677	253478393	716	3.66	chr1:253477921-253478132				Unknown										211	17	128	16.1	60.7	253477921	253478132
Cap	3454	chr7	26954815	26955555	740	3.66	chr7:26955043-26955276				Unknown										233	20	143	17.2	61.4	26955043	26955276
Cap	3871	chr8_random	664673	665380	707	3.66	chr8_random:664816-665210	Trim42	LCP	+	Intragenic	4195	-16862	tripartite motif-containing 42	NP_001013977		NM_001013955	660818	681875	21057	394	29	234	14.7	59.4	664816	665210
Cap	115	chr1	190049134	190049751	617	3.67	chr1:190049319-190049639	Tacc2	LCP	+	Intragenic	154543	-36310	transforming acidic coiled coil 2 isoform 1	NP_001004415	This gene encodes a member of the transforming, acidic coiled-coil (TACC) family of proteins. Members of this family are centrosomal proteins that interact with microtubules and tubulin. TACC proteins are thought to be involved in centrosome/mitotic spindle dynamics and gene regulation. Alternative splicing results in multiple transcript variants encoding different isoforms.	NM_001004415	189894936	190085789	190853	320	28	194	17.5	60.6	190049319	190049639
[truncated: 3,231 more rows]

## Sheet: Peaks for promoters
SampleName	PeakID	PeakChromosome	PeakStart	PeakEnd	PeakLength	PeakScore	GeneName	Chr	Strand	PeakToTSS	Accession	PromoterType	TransStart	TransEnd	ProteinName	ProteinID	LocusLinkID	mRNADescription
[truncated: 6,625 more rows]

## Sheet: Summary for CpG Islands
CpGName	CpGLength	IS	Cap	Cor	Cau	PositiveSampleCount	GeneName	Chromosome	Strand	PromoterType	RelativeLocation	CpGRelativeDistanceToTSS	CpGRelativeDistanceToTSE	Accession	TransStart	TransEnd	TranscriptsLength	ProteinID	ProteinName	mRNADescription	cpgNum	gcNum	perCpg	perGc	CpGStart	CpGEnd
[truncated: 2,002 more rows]

[truncated: 2 more sheets: Summary for promoters, Summary]
