# Supplementary material for: Epididymal Region-Specific miRNA Expression and DNA Methylation and Their Roles in Controlling Gene Expression in Rats
Source: PLoS One. 2015 Apr 22;10(4):e0124450. doi: 10.1371/journal.pone.0124450 (PMC4406618; doi:10.1371/journal.pone.0124450)
Supplement: S4 Table — (XLSX) [file pone.0124450.s008.xlsx]

## Sheet: miRNA_Cap
	metric for ranking genes	parameter p=0			parameter p=1			parameter p=1.5			parameter p=2
		ES	p_value	FDR	ES	p_value	FDR	ES	p_value	FDR	ES	p_value	FDR
	Signal2Noise	-0.88	0.598	0.6	-0.85	0.776	0.742	-1	0.005	1	1.03	0.374	0.39
	tTest	-0.86	0.664	0.643	-0.94	0.578	0.697	-1	0.003	1	0.87	0.751	0.717
	Ratio_of_Classes	-0.96	0.483	0.495	1.21	0.227	0.582	-1.27	0.188	0.911	1.54	0.152	0.784
	diff_of_Classes	1.22	0.219	0.635	-0.86	0.713	0.852	-1	0.005	1	-0.96	0.548	0.947
	log2_Ratio_of_Classes	-0.97	0.473	0.459	0.81	0.843	0.805	-1	0.005	1	1.11	0.323	0.669

## Sheet: miRNA_Cau
	metric for ranking genes	parameter p=0			parameter p=1			parameter p=1.5			parameter p=2
		ES	p_value	FDR	ES	p_value	FDR	ES	p_value	FDR	ES	p_value	FDR
	Signal2Noise	1.48	0.078	0.138	-0.86	0.637	0.917	-1	0	1	-1.01	0.443	0.573
	tTest	1.43	0.093	0.176	-0.9	0.595	0.641	-1	0.001	1	-1	0.464	0.615
	Ratio_of_Classes	1.35	0.122	0.241	1.37	0.155	0.768	-0.98	0.368	0.664	1.13	0.304	0.566
	diff_of_Classes	1.02	0.418	0.404	-1.01	0.491	1	-1	0.001	1	-0.99	0.578	1
	log2_Ratio_of_Classes	1.34	0.149	0.262	-0.95	0.527	0.529	-1	0.002	1	-1.11	0.365	0.456

## Sheet: methylation_Cap
	metric for ranking genes	parameter p=0			parameter p=1			parameter p=1.5			parameter p=2
		ES	p_value	FDR	ES	p_value	FDR	ES	p_value	FDR	ES	p_value	FDR
	Signal2Noise	-1.29	0.163	0.252	-1.11	0.268	0.699	-1	0.004	1	-0.78	0.894	0.86
	tTest	-1.22	0.233	0.328	-1.09	0.304	0.766	-1	0.004	1	-0.83	0.807	0.785
	Ratio_of_Classes	-1.51	0.056	0.206	0.6	0.88	0.869	-0.71	0.906	0.901	0.57	0.842	0.845
	diff_of_Classes	-0.82	0.669	0.681	-1.39	0.044	0.286	-1	0.006	1	-1.25	0.174	0.813
	log2_Ratio_of_Classes	-1.57	0.046	0.163	-1.38	0.054	0.256	-1	0.004	1	-1.33	0.104	0.327

## Sheet: methylation_Cau
	metric for ranking genes		parameter p=0			parameter p=1			parameter p=1.5			parameter p=2
		ES	p_value	FDR	ES	p_value	FDR	ES	p_value	FDR	ES	p_value	FDR
	Signal2Noise	1.03	0.396	0.404	-1.06	0.351	0.594	-1	0.002	1	-1.1	0.296	0.605
	tTest	0.82	0.69	0.69	-0.98	0.479	0.825	-1	0.004	1	-1.1	0.301	0.601
	Ratio_of_Classes	1.24	0.2	0.191	1.2	0.24	0.394	-0.97	0.418	0.527	1	0.415	0.52
	diff_of_Classes	1.07	0.336	0.524	-0.84	0.724	0.723	-1	0.006	1	-0.94	0.61	0.747
	log2_Ratio_of_Classes	1.26	0.181	0.182	-0.96	0.521	0.68	-1	0.006	1	-0.93	0.544	0.56
